# Supplementary material for: Cu-catalyzed cascade difluoroalkylation/5-endocyclization/β-fluorine cleavage of ynones
Source: Royal Society of Chemistry journal article supplement (doi:10.1039/d2cc06068j), 2023-01-01
Supplement: d2cc06068j1.pdf [file d2cc06068j1.pdf]

*Supporting Information to*

**Cu-catalyzed cascade difluoroalkylation/5-endo cyclization/ $\beta$ -fluorine cleavage of ynones**

*Jingwen Su, Wenbin Guo, Yi Liu, Lichun Kong, Hanliang Zheng\* and Gangguo Zhu\**

*Key Laboratory of the Ministry of Education for Advanced Catalysis Materials, Department of Chemistry, Zhejiang Normal University, 688 Yingbin Road, Jinhua 321004, P. R. China*

*\*E-Mail: hanliang@zjnu.edu.cn; gangguo@zjnu.cn*

**Contents**

|                                                                       |                |
|-----------------------------------------------------------------------|----------------|
| <b>1. General Information.....</b>                                    | <b>S2</b>      |
| <b>2. Supplementary optimization of the reaction condition.....</b>   | <b>S2</b>      |
| <b>3. General Procedures for Experiments and Analytical Data.....</b> | <b>S3-S15</b>  |
| <b>4. Mechanistic Experiments.....</b>                                | <b>S16-S21</b> |
| <b>5. NMR Spectra.....</b>                                            | <b>S22-S65</b> |
| <b>6. X-Ray Crystallographic Data.....</b>                            | <b>S66-S67</b> |
| <b>7. Computational Data.....</b>                                     | <b>S68-S71</b> |

## 1. General Information

Unless otherwise noted, materials obtained from commercial suppliers were used directly without further purification. Ynones were prepared according to the method reported in the literature.<sup>1</sup> Melting points reported here were measured by a melting point instrument and were uncorrected. <sup>1</sup>H, <sup>13</sup>C, and <sup>19</sup>F NMR spectra were measured on a 600 MHz or 400 MHz NMR spectrometer. Chemical shifts are given in parts per million on the delta ( $\delta$ ) scale, and the coupling constants are given in hertz. <sup>1</sup>H NMR chemical shifts were determined relative to the internal standard tetramethylsilane (TMS) at 0.00 ppm, <sup>13</sup>C NMR shifts were determined relative to the residual solvent peaks of CDCl<sub>3</sub> at  $\delta$  77.00 ppm, and <sup>19</sup>F NMR chemical shifts were determined relative to outside standard CFC1<sub>3</sub> at  $\delta$  0.00 ppm. High-resolution mass spectrometry (HRMS) analysis was carried out using a TOF MS instrument with an ESI source. Flash column chromatography was carried out on the silica gel (200-300 mesh).

## 2. Supplementary optimization of the reaction condition.

Tables S1. Base screening<sup>a</sup>

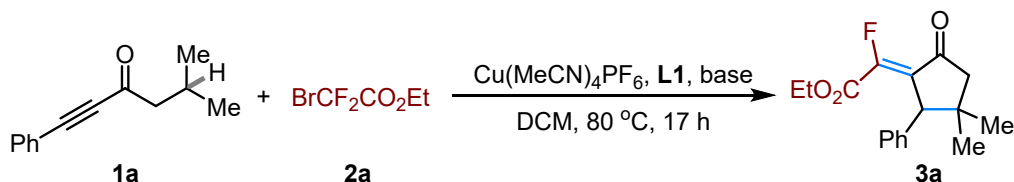

| Entry | Base                            | Yield (%) <sup>b</sup> | Z/E <sup>c</sup> |
|-------|---------------------------------|------------------------|------------------|
| 1     | Na <sub>2</sub> CO <sub>3</sub> | 8                      | 1.5:1            |
| 2     | Cs <sub>2</sub> CO <sub>3</sub> | 58                     | 6.6:1            |
| 3     | Li <sub>2</sub> CO <sub>3</sub> | trace                  | -                |
| 4     | NaHCO <sub>3</sub>              | 8                      | 3.7:1            |
| 5     | KOMe                            | 8                      | 3.0:1            |
| 6     | K <sub>2</sub> HPO <sub>4</sub> | 21                     | 8.2:1            |
| 7     | KH <sub>2</sub> PO <sub>4</sub> | 36                     | 8.6:1            |

<sup>1</sup> (a) Q.-X. Wang, and J. A. May, Formation of  $\beta$ -oxo-N-vinylimidates via intermolecular ester incorporation in Huisgen cyclization/carbene cascade reactions. *Org. Lett.*, 2020, **22**, 9579; (b) T. P. Reddy, J. Gujral, P. Roy, and D. B. Ramachary, Catalytic ynone-amidine formal [4 + 2]-cycloaddition for the regioselective synthesis of tricyclic azepines. *Org. Lett.*, 2020, **22**, 9653.

|   |      |    |       |
|---|------|----|-------|
| 8 | KOAc | 8  | 3.8:1 |
| 9 | KF   | 35 | 7.0:1 |

<sup>a</sup> Reaction conditions: **1a** (0.2 mmol), **2a** (0.7 mmol), base (0.4 mmol), [Cu] (20 mol%), ligand (40 mol%), solvent (2 mL), 80 °C, 17 h. <sup>b</sup> GC yield with 1.0 equivalent naphthene as internal standard.

<sup>c</sup> Determined by <sup>19</sup>F NMR.

### 3. General Procedures for Experiments and Analytical Data

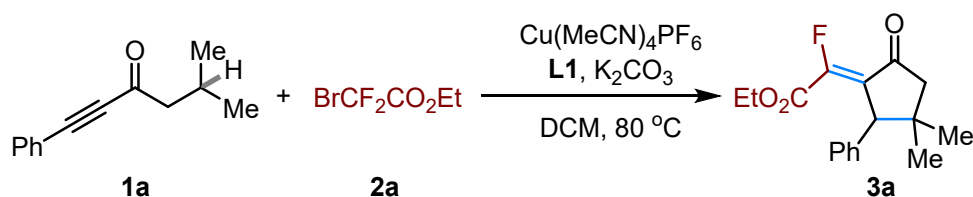

To a mixture of  $\text{Cu}(\text{MeCN})_4\text{PF}_6$  (14.9 mg, 0.04 mmol), **L1** (18.9 mg, 0.08 mmol), **2a** (142.1 mg, 0.7 mmol) and  $\text{K}_2\text{CO}_3$  (55.3 mg, 0.4 mmol) in 2 mL of DCM was added **1a** (37.2 mg, 0.2 mmol) under nitrogen atmosphere. After stirring at 80 °C for 17 h, the reaction mixture was quenched with water, extracted with DCM, washed with brine, dried over anhydrous  $\text{Na}_2\text{SO}_4$ , and concentrated. Column chromatography on silica gel (petroleum ethers/EtOAc = 50:1) gave 42 mg (72% yield) of **3a** as a yellow oil, *Z/E* = 10:1. <sup>1</sup>H NMR (400 MHz,  $\text{CDCl}_3$ )  $\delta$  7.31 – 7.27 (m, 2H), 7.25 – 7.21 (m, 1H), 7.06 – 7.04 (m, 2H), 4.27 (s, 1H), 4.16 – 4.08 (m 2H), 2.51 (d, *J* = 18.0 Hz, 1H), 2.21 (dd, *J* = 18.0, 1.5 Hz, 1H), 1.20 (s, 3H), 1.18 (t, *J* = 7.1 Hz, 3H), 0.77 (s, 3H); <sup>13</sup>C NMR (151 MHz,  $\text{CDCl}_3$ )  $\delta$  204.10, 160.25 (d, *J* = 35.1 Hz), 147.59 (d, *J* = 290.8 Hz), 141.24 (d, *J* = 3.3 Hz), 129.65 (d, *J* = 2.5 Hz), 128.26, 128.19, 126.80, 62.34, 56.36, 51.34, 38.52, 30.80, 25.31, 13.85; <sup>19</sup>F NMR (377 MHz,  $\text{CDCl}_3$ )  $\delta$  -111.12; HRMS (ESI) *m/z*: [*M* + H]<sup>+</sup> Calcd for  $\text{C}_{17}\text{H}_{19}\text{FO}_3 + \text{H}^+$ : 291.1391; Found 291.1393.

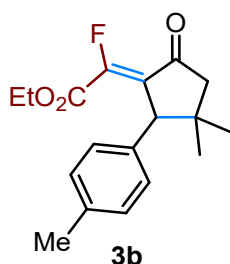

**Compound 3b**: 44 mg, 75% yield, yellow oil, *Z/E* > 20:1; Flash column chromatography conditions: petroleum ethers/EtOAc = 50:1; <sup>1</sup>H NMR (600 MHz,  $\text{CDCl}_3$ )  $\delta$  7.09 (d, *J* = 7.8 Hz, 2H), 6.93 (d, *J*

= 7.8 Hz, 2H), 4.23 (s, 1H), 4.18 – 4.06 (m, 2H), 2.50 (d,  $J = 18.0$  Hz, 1H), 2.31 (s, 3H), 2.19 (dd,  $J = 18.0, 1.5$  Hz, 1H), 1.21 – 1.17 (m, 6H), 0.77 (s, 3H);  $^{13}\text{C}$  NMR (151 MHz,  $\text{CDCl}_3$ )  $\delta$  204.31, 160.29 (d,  $J = 34.8$  Hz), 147.43 (d,  $J = 290.5$  Hz), 138.22 (d,  $J = 3.3$  Hz), 136.36, 129.92, 128.94, 128.05, 62.32, 56.01, 51.29, 38.49, 30.79, 25.30, 21.01, 13.88;  $^{19}\text{F}$  NMR (565 MHz,  $\text{CDCl}_3$ )  $\delta$  -111.52; HRMS (ESI)  $m/z$ :  $[M + \text{H}]^+$  Calcd for  $\text{C}_{18}\text{H}_{21}\text{FO}_3 + \text{H}^+$ : 305.1547; Found 305.1538.

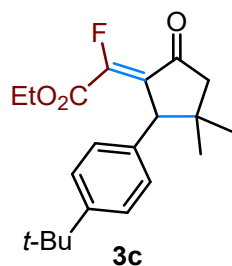

**Compound 3c:** 48 mg, 70% yield, yellow oil,  $Z/E > 20:1$ ; Flash column chromatography conditions: petroleum ethers/EtOAc = 50:1;  $^1\text{H}$  NMR (400 MHz,  $\text{CDCl}_3$ )  $\delta$  7.21 (d,  $J = 8.4$  Hz, 2H), 6.89 (d,  $J = 8.3$  Hz, 2H), 4.17 (s, 1H), 4.09 – 4.01 (m, 2H), 2.45 (d,  $J = 18.0$  Hz, 1H), 2.12 (dd,  $J = 18.0, 1.5$  Hz, 1H), 1.22 (s, 9H), 1.12 (s, 3H), 1.09 (t,  $J = 7.1$  Hz, 3H), 0.70 (s, 3H);  $^{13}\text{C}$  NMR (151 MHz,  $\text{CDCl}_3$ )  $\delta$  204.32, 160.32 (d,  $J = 35.2$  Hz), 149.56, 147.47 (d,  $J = 289.8$  Hz), 138.05 (d,  $J = 3.2$  Hz), 129.84, 127.80, 125.08, 62.29, 55.93, 51.35, 38.56, 34.40, 31.32, 30.69, 25.33, 13.82;  $^{19}\text{F}$  NMR (377 MHz,  $\text{CDCl}_3$ )  $\delta$  -111.52; HRMS (ESI)  $m/z$ :  $[M + \text{H}]^+$  Calcd for  $\text{C}_{21}\text{H}_{27}\text{FO}_3 + \text{H}^+$ : 347.2017; Found 347.2005.

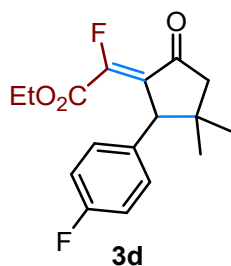

**Compound 3d:** 48 mg, 62% yield, yellow oil,  $Z/E > 20:1$ ; Flash column chromatography conditions: petroleum ethers/EtOAc = 50:1;  $^1\text{H}$  NMR (600 MHz,  $\text{CDCl}_3$ )  $\delta$  7.03 – 6.97 (m, 4H), 4.26 (s, 1H), 4.15 (q,  $J = 7.2$  Hz, 2H), 2.47 (d,  $J = 18.0$  Hz, 1H), 2.21 (d,  $J = 18.0$  Hz, 1H), 1.21 – 1.20 (m, 3H), 1.19 (s, 3H), 0.77 (s, 3H);  $^{13}\text{C}$  NMR (101 MHz,  $\text{CDCl}_3$ )  $\delta$  203.83, 162.86, 160.39 (d,  $J = 6.7$  Hz), 160.01, 147.66 (d,  $J = 292.2$  Hz), 137.06 (t,  $J = 3.4$  Hz), 129.58 (d,  $J = 5.7$  Hz), 115.19 (d,  $J = 21.4$

Hz), 62.44, 55.57, 51.20, 38.47, 30.73, 25.29, 13.88;  $^{19}\text{F}$  NMR (565 MHz,  $\text{CDCl}_3$ )  $\delta$  -110.78, -115.74; HRMS (ESI)  $m/z$ :  $[M + \text{H}]^+$  Calcd for  $\text{C}_{17}\text{H}_{18}\text{F}_2\text{O}_3 + \text{H}^+$ : 309.1297; Found 309.1290.

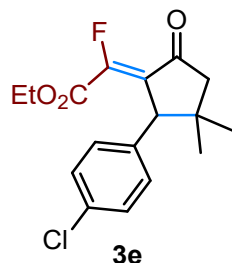

**Compound 3e:** 53 mg, 81% yield, yellow oil,  $Z/E > 20:1$ ; Flash column chromatography conditions: petroleum ethers/EtOAc = 50:1;  $^1\text{H}$  NMR (600 MHz, Chloroform- $d$ )  $\delta$  7.26 (d,  $J = 8.5$  Hz, 2H), 6.99 (d,  $J = 8.5$  Hz, 2H), 4.25 (s, 1H), 4.15 (q,  $J = 7.1$  Hz, 2H), 2.46 (d,  $J = 18.0$  Hz, 1H), 2.22 (dd,  $J = 18.0, 1.5$  Hz, 1H), 1.21 (t,  $J = 7.1$  Hz, 3H), 1.19 (s, 3H), 0.77 (s, 3H);  $^{13}\text{C}$  NMR (151 MHz,  $\text{CDCl}_3$ )  $\delta$  203.63, 160.13 (d,  $J = 34.6$  Hz), 147.68 (d,  $J = 292.7$  Hz), 139.78 (d,  $J = 3.5$  Hz), 132.66, 129.45, 129.30, 128.48, 62.48, 55.72, 51.21, 38.49, 30.78, 25.30, 13.89;  $^{19}\text{F}$  NMR (565 MHz,  $\text{CDCl}_3$ )  $\delta$  -110.56; HRMS (ESI)  $m/z$ :  $[M + \text{H}]^+$  Calcd for  $\text{C}_{17}\text{H}_{18}\text{ClFO}_3 + \text{H}^+$ : 325.1001; Found 325.0995.

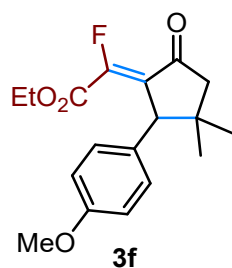

**Compound 3f:** 51 mg, 80% yield, yellow oil,  $Z/E = 12:1$ ; Flash column chromatography conditions: petroleum ethers/EtOAc = 30:1;  $^1\text{H}$  NMR (400 MHz,  $\text{CDCl}_3$ )  $\delta$  6.96 (d,  $J = 8.6$  Hz, 2H), 6.82 (d,  $J = 8.8$  Hz, 2H), 4.22 (s, 1H), 4.16 – 4.11 (m, 2H), 3.78 (s, 3H), 2.49 (d,  $J = 18.0$  Hz, 1H), 2.19 (dd,  $J = 18.0, 1.5$  Hz, 1H), 1.20 (t,  $J = 7.2$  Hz, 3H), 1.18 (s, 3H), 0.77 (s, 3H);  $^{13}\text{C}$  NMR (151 MHz,  $\text{CDCl}_3$ )  $\delta$  204.35, 160.30 (d,  $J = 35.2$  Hz), 158.32, 147.46 (d,  $J = 290.5$  Hz), 133.47 (d,  $J = 3.2$  Hz), 129.98, 129.12, 113.61, 62.35, 55.58, 55.19, 51.26, 38.55, 30.70, 25.29, 13.89;  $^{19}\text{F}$  NMR (377 MHz,  $\text{CDCl}_3$ )  $\delta$  -111.50; HRMS (ESI)  $m/z$ :  $[M + \text{H}]^+$  Calcd for  $\text{C}_{18}\text{H}_{21}\text{FO}_4 + \text{H}^+$ : 321.1497; Found 321.1501.

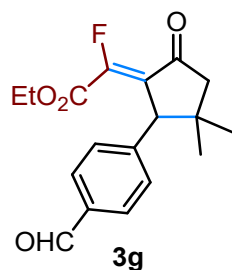

**Compound 3g:** 45 mg, 70% yield, yellow oil, *Z/E* = 16:1; Flash column chromatography conditions: petroleum ethers/EtOAc = 30:1;  $^1\text{H}$  NMR (600 MHz,  $\text{CDCl}_3$ )  $\delta$  9.98 (s, 1H), 7.83 (d,  $J$  = 8.4 Hz, 2H), 7.24 (d,  $J$  = 8.4 Hz, 2H), 4.36 (s, 1H), 4.14 (q,  $J$  = 7.1 Hz, 2H), 2.50 (d,  $J$  = 18.1 Hz, 1H), 2.26 (dd,  $J$  = 18.1, 1.3 Hz, 1H), 1.23 (s, 3H), 1.19 (t,  $J$  = 7.1 Hz, 3H), 0.78 (s, 3H);  $^{13}\text{C}$  NMR (151 MHz,  $\text{CDCl}_3$ )  $\delta$  203.23, 191.65, 160.07 (d,  $J$  = 34.4 Hz), 148.35 (d,  $J$  = 3.5 Hz), 147.87 (d,  $J$  = 293.6 Hz), 135.10, 129.75, 128.90, 128.87, 62.54, 56.42, 51.31, 38.74, 30.89, 25.32, 13.87;  $^{19}\text{F}$  NMR (565 MHz,  $\text{CDCl}_3$ )  $\delta$  -109.94; HRMS (ESI)  $m/z$ :  $[M + \text{H}]^+$  Calcd for  $\text{C}_{18}\text{H}_{19}\text{FO}_4 + \text{H}^+$ : 319.1340; Found 319.1340.

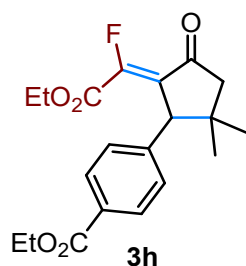

**Compound 3h:** 43 mg, 60% yield, yellow oil, *Z/E* = 11:1; Flash column chromatography conditions: petroleum ethers/EtOAc = 40:1;  $^1\text{H}$  NMR (600 MHz,  $\text{CDCl}_3$ )  $\delta$  7.97 (d,  $J$  = 8.6 Hz, 2H), 7.13 (d,  $J$  = 8.4 Hz, 2H), 4.36 (q,  $J$  = 7.1 Hz, 2H), 4.32 (s, 1H), 4.15 – 4.09 (m, 2H), 2.49 (d,  $J$  = 18.0 Hz, 1H), 2.24 (dd,  $J$  = 18.0, 1.4 Hz, 1H), 1.38 (t,  $J$  = 7.1 Hz, 3H), 1.22 (s, 3H), 1.18 (t,  $J$  = 7.1 Hz, 3H), 0.76 (s, 3H);  $^{13}\text{C}$  NMR (101 MHz,  $\text{CDCl}_3$ )  $\delta$  203.49, 166.26, 160.09 (d,  $J$  = 34.6 Hz), 148.80 (d,  $J$  = 293.6 Hz), 146.40 (d,  $J$  = 3.3 Hz), 129.57, 129.14, 129.06 (d,  $J$  = 3.1 Hz), 128.17, 62.48, 60.98, 56.28, 51.32, 38.62, 30.83, 25.29, 14.32, 13.87;  $^{19}\text{F}$  NMR (565 MHz,  $\text{CDCl}_3$ )  $\delta$  -110.22; HRMS (ESI)  $m/z$ :  $[M + \text{H}]^+$  Calcd for  $\text{C}_{20}\text{H}_{23}\text{FO}_5 + \text{H}^+$ : 363.1602; Found 363.1592.

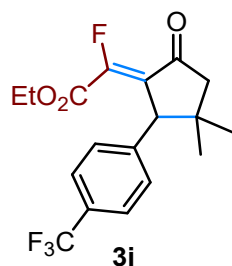

**Compound 3i:** 49 mg, 69% yield, yellow oil, *Z/E* = 11:1; Flash column chromatography conditions: petroleum ethers/EtOAc = 50:1;  $^1\text{H}$  NMR (600 MHz,  $\text{CDCl}_3$ )  $\delta$  7.56 (d,  $J$  = 8.0 Hz, 2H), 7.18 (d,  $J$  = 7.9 Hz, 2H), 4.34 (s, 1H), 4.14 (q,  $J$  = 7.1 Hz, 2H), 2.48 (d,  $J$  = 18.1 Hz, 1H), 2.25 (dd,  $J$  = 18.1, 1.4 Hz, 1H), 1.22 (s, 3H), 1.19 (t,  $J$  = 7.2 Hz, 3H), 0.77 (s, 3H);  $^{13}\text{C}$  NMR (151 MHz,  $\text{CDCl}_3$ )  $\delta$  203.38, 160.08 (d,  $J$  = 34.2 Hz), 147.82 (d,  $J$  = 293.8 Hz), 145.30, 129.13 (q,  $J$  = 32.7 Hz), 128.99 (d,  $J$  = 3.3 Hz), 128.48, 125.29 (d,  $J$  = 3.8 Hz), 124.05 (q,  $J$  = 272.21 Hz), 62.55, 56.10, 51.22, 38.60, 30.84, 25.33, 13.85;  $^{19}\text{F}$  NMR (565 MHz,  $\text{CDCl}_3$ )  $\delta$  -62.50, -110.10; HRMS (ESI)  $m/z$ : [ $M + \text{H}$ ] $^+$  Calcd for  $\text{C}_{18}\text{H}_{18}\text{F}_4\text{O}_3 + \text{H}^+$ : 359.1265; Found 359.1281.

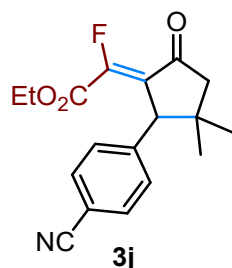

**Compound 3j:** 45 mg, 71% yield, yellow oil, *Z/E* = 10:1; Flash column chromatography conditions: petroleum ethers/EtOAc = 50:1;  $^1\text{H}$  NMR (600 MHz,  $\text{CDCl}_3$ )  $\delta$  7.60 (d,  $J$  = 8.4 Hz, 2H), 7.18 (d,  $J$  = 8.0 Hz, 2H), 4.32 (s, 1H), 4.15 (q,  $J$  = 7.1 Hz, 2H), 2.45 (d,  $J$  = 18.1 Hz, 1H), 2.26 (dd,  $J$  = 18.1, 1.4 Hz, 1H), 1.22 (s, 3H), 1.20 (d,  $J$  = 7.1 Hz, 3H), 0.76 (s, 3H);  $^{13}\text{C}$  NMR (151 MHz,  $\text{CDCl}_3$ )  $\delta$  202.91, 160.01 (d,  $J$  = 34.0 Hz), 147.92 (d,  $J$  = 295.4 Hz), 146.76 (d,  $J$  = 3.5 Hz), 132.15, 128.94, 128.59, 118.55, 110.88, 62.62, 56.32, 51.23, 38.71, 30.88, 25.33, 13.89;  $^{19}\text{F}$  NMR (377 MHz,  $\text{CDCl}_3$ )  $\delta$  -109.62; HRMS (ESI)  $m/z$ : [ $M + \text{H}$ ] $^+$  Calcd for  $\text{C}_{18}\text{H}_{18}\text{FNO}_3 + \text{H}^+$ : 316.1343; Found 316.1333.

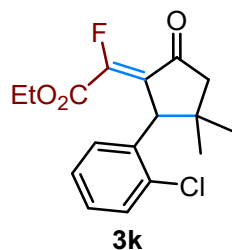

*Compound 3k*: 47 mg, 73% yield, yellow oil, *Z/E* = 14:1; Flash column chromatography conditions: petroleum ethers/EtOAc = 50:1;  $^1\text{H}$  NMR (400 MHz,  $\text{CDCl}_3$ )  $\delta$  7.42 (dd,  $J$  = 5.8, 3.5 Hz, 1H), 7.17 – 7.15 (m, 2H), 6.84 (dd,  $J$  = 5.9, 3.5 Hz, 1H), 4.89 (s, 1H), 4.16 (q,  $J$  = 7.2, 2H), 2.50 (d,  $J$  = 18.1 Hz, 1H), 2.20 (dd,  $J$  = 18.1, 1.4 Hz, 1H), 1.25 (s, 3H), 1.13 (t,  $J$  = 7.1 Hz, 3H), 0.87 (s, 3H);  $^{13}\text{C}$  NMR (101 MHz,  $\text{CDCl}_3$ )  $\delta$  203.81, 160.05 (d,  $J$  = 35.5 Hz), 147.85 (d,  $J$  = 290.3 Hz), 139.93 (d,  $J$  = 3.6 Hz), 134.88, 129.70, 129.40 (d,  $J$  = 3.4 Hz), 127.95, 127.57, 127.07, 62.58, 51.76, 51.52, 39.10, 30.78, 23.85, 13.85;  $^{19}\text{F}$  NMR (377 MHz,  $\text{CDCl}_3$ )  $\delta$  -109.26; HRMS (ESI)  $m/z$ :  $[M + \text{H}]^+$  Calcd for  $\text{C}_{17}\text{H}_{18}\text{ClFO}_3 + \text{H}^+$ : 325.1001; Found 325.0987.

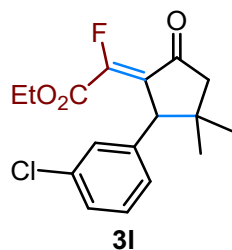

*Compound 3l*: 40 mg, 65% yield, yellow oil, *Z/E* = 12:1; Flash column chromatography conditions: petroleum ethers/EtOAc = 50:1;  $^1\text{H}$  NMR (600 MHz,  $\text{CDCl}_3$ )  $\delta$  7.23 – 7.22 (m, 2H), 7.04 (s, 1H), 6.93 (d,  $J$  = 6.3 Hz, 1H), 4.24 (s, 1H), 4.15 (q,  $J$  = 7.1 Hz, 2H), 2.49 (d,  $J$  = 18.1 Hz, 1H), 2.23 (dd,  $J$  = 18.1, 1.4 Hz, 1H), 1.21 (t,  $J$  = 7.1 Hz, 3H), 1.20 (s, 3H), 0.79 (s, 3H);  $^{13}\text{C}$  NMR (151 MHz,  $\text{CDCl}_3$ )  $\delta$  203.54, 160.11 (d,  $J$  = 35.1 Hz), 147.80 (d,  $J$  = 292.4 Hz), 143.23 (d,  $J$  = 3.6 Hz), 134.20, 129.56, 128.96, 128.30, 127.07, 126.34, 62.54, 56.00, 51.24, 38.55, 30.82, 25.32, 13.86;  $^{19}\text{F}$  NMR (377 MHz,  $\text{CDCl}_3$ )  $\delta$  -110.14; HRMS (ESI)  $m/z$ :  $[M + \text{H}]^+$  Calcd for  $\text{C}_{17}\text{H}_{18}\text{ClFO}_3 + \text{H}^+$ : 325.1001; Found 325.0996.



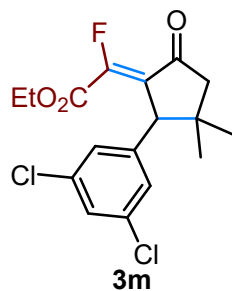

**Compound 3m:** 43 mg, 60% yield, yellow oil, *Z/E* = 10:1; Flash column chromatography conditions: petroleum ethers/EtOAc = 50:1; <sup>1</sup>H NMR (600 MHz, CDCl<sub>3</sub>) δ 7.45 (d, *J* = 2.2 Hz, 1H), 7.16 (dd, *J* = 8.4, 2.2 Hz, 1H), 6.77 (d, *J* = 8.4 Hz, 1H), 4.85 (s, 1H), 4.22 – 4.16 (m, 2H), 2.46 (d, *J* = 18.2 Hz, 1H), 2.23 (dd, *J* = 18.1, 1.4 Hz, 1H), 1.25 (s, 3H), 1.19 (t, *J* = 7.2 Hz, 3H), 0.89 (s, 3H); <sup>13</sup>C NMR (101 MHz, CDCl<sub>3</sub>) δ 202.97, 160.01 (d, *J* = 34.2 Hz), 148.02 (d, *J* = 294.3 Hz), 144.57 (d, *J* = 3.8 Hz), 134.91, 128.33 (d, *J* = 3.5 Hz), 127.19, 126.65, 62.69, 55.78, 51.16, 38.61, 30.84, 25.33, 13.87; <sup>19</sup>F NMR (377 MHz, CDCl<sub>3</sub>) δ -109.25; HRMS (ESI) *m/z*: [*M* + H]<sup>+</sup> Calcd for C<sub>17</sub>H<sub>17</sub>Cl<sub>2</sub>FO<sub>3</sub>+H<sup>+</sup>: 359.0612; Found 325.0603.

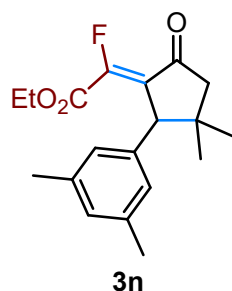

**Compound 3n:** 46 mg, 72% yield, yellow oil, *Z/E* = 12:1; Flash column chromatography conditions: petroleum ethers/EtOAc = 30:1; <sup>1</sup>H NMR (600 MHz, CDCl<sub>3</sub>) δ 6.85 (s, 1H), 6.62 (s, 2H), 4.19 (s, 1H), 4.17 – 4.11 (m, 2H), 2.52 (d, *J* = 18.0 Hz, 1H), 2.27 (s, 6H), 2.18 (dd, *J* = 18.1, 1.5 Hz, 1H), 1.20 (t, *J* = 7.2 Hz, 3H), 1.18 (s, 3H), 0.77 (s, 3H); <sup>13</sup>C NMR (151 MHz, CDCl<sub>3</sub>) δ 204.54, 160.34 (d, *J* = 34.9 Hz), 147.40 (d, *J* = 289.8 Hz), 141.04 (d, *J* = 3.2 Hz), 137.57, 129.90, 128.45, 126.09, 62.33, 56.23, 51.30, 38.45, 30.88, 25.33, 21.38, 13.83; <sup>19</sup>F NMR (565 MHz, CDCl<sub>3</sub>) δ -111.60; HRMS (ESI) *m/z*: [*M* + H]<sup>+</sup> Calcd for C<sub>19</sub>H<sub>23</sub>FO<sub>3</sub>+H<sup>+</sup>: 319.1704; Found 319.1696.

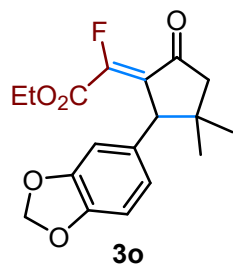

**Compound 3o:** 51 mg, 77% yield, yellow solid, mp 124-126 °C, *Z/E* = 10:1; Flash column chromatography conditions: petroleum ethers/EtOAc = 30:1; <sup>1</sup>H NMR (400 MHz, CDCl<sub>3</sub>) δ 6.72 (d, *J* = 8.0 Hz, 1H), 6.54 (d, *J* = 1.8 Hz, 1H), 6.49 (dd, *J* = 8.0, 1.8 Hz, 1H), 5.93 (s, 2H), 4.20 (s, 1H), 4.22 – 4.12 (m, 2H), 2.49 (d, *J* = 18.1 Hz, 1H), 2.18 (dd, *J* = 18.0, 1.5 Hz, 1H), 1.23 (t, *J* = 7.2 Hz, 3H), 1.17 (s, 3H), 0.81 (s, 3H); <sup>13</sup>C NMR (151 MHz, CDCl<sub>3</sub>) δ 204.11, 160.25 (d, *J* = 34.9 Hz), 147.54 (d, *J* = 291.7 Hz), 147.51, 146.44 (d, *J* = 41.3 Hz), 135.16 (d, *J* = 4.1 Hz), 129.72, 121.19, 108.77, 108.04, 101.04, 62.40, 55.98, 51.19, 38.57, 30.81, 25.29, 13.93; <sup>19</sup>F NMR (377 MHz, CDCl<sub>3</sub>) δ -111.09; HRMS (ESI) *m/z*: [*M* + H]<sup>+</sup> Calcd for C<sub>18</sub>H<sub>19</sub>FO<sub>5</sub>+H<sup>+</sup>: 335.1289; Found 335.1278.

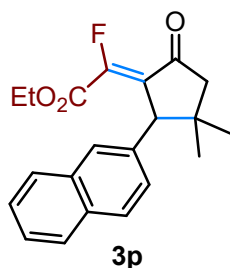

**Compound 3p:** 27 mg, 40% yield, yellow oil, *Z/E* = 10:1; Flash column chromatography conditions: petroleum ethers/EtOAc = 20:1; <sup>1</sup>H NMR (400 MHz, CDCl<sub>3</sub>) δ 7.82 – 7.76 (m, 3H), 7.49 – 7.43 (m, 3H), 7.26 – 7.23 (m, 1H), 4.46 (s, 1H), 4.12 – 4.05 (m, 2H), 2.60 (d, *J* = 18.1 Hz, 1H), 2.25 (dd, *J* = 18.0, 1.4 Hz, 1H), 1.26 (s, 3H), 1.14 (t, *J* = 7.1 Hz, 3H), 0.80 (s, 3H); <sup>13</sup>C NMR (101 MHz, CDCl<sub>3</sub>) δ 204.24, 160.23 (d, *J* = 34.9 Hz), 147.70 (d, *J* = 291.3 Hz), 139.01, 133.21, 132.32, 129.82 (d, *J* = 2.7 Hz), 127.82, 127.79, 127.60, 127.34, 126.29, 126.16, 125.80, 62.39, 56.42, 51.36, 38.79, 30.95, 25.40, 13.84; <sup>19</sup>F NMR (377 MHz, CDCl<sub>3</sub>) δ -110.87. HRMS (ESI) *m/z*: [*M* + H]<sup>+</sup> Calcd for C<sub>21</sub>H<sub>21</sub>FO<sub>3</sub>+H<sup>+</sup>: 341.1547; Found 341.1547.

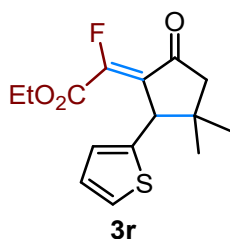

**Compound 3r:** 30 mg, 51% yield, yellow oil, *Z/E* = 10:1; Flash column chromatography conditions: petroleum ethers/EtOAc = 30:1;  $^1\text{H NMR}$  (400 MHz,  $\text{CDCl}_3$ )  $\delta$  7.15 (dd,  $J = 5.1, 1.2$  Hz, 1H), 6.93 (dd,  $J = 5.1, 3.5$  Hz, 1H), 6.76 (dt,  $J = 3.5, 0.8$  Hz, 1H), 4.57 (s, 1H), 4.21 (q,  $J = 7.2$  Hz, 2H), 2.61 (d,  $J = 18.1$  Hz, 1H), 2.21 (dd,  $J = 18.1, 1.6$  Hz, 1H), 1.25 (t,  $J = 7.1$  Hz, 3H), 1.18 (s, 3H), 0.91 (s, 3H);  $^{13}\text{C NMR}$  (101 MHz,  $\text{CDCl}_3$ )  $\delta$  203.26, 160.21 (d,  $J = 34.8$  Hz), 147.82 (d,  $J = 292.0$  Hz), 143.42 (d,  $J = 4.1$  Hz), 129.47 (d,  $J = 3.5$  Hz), 126.59, 125.24, 123.59, 62.53, 51.58, 50.89, 38.60, 30.09, 24.92, 13.92;  $^{19}\text{F NMR}$  (377 MHz,  $\text{CDCl}_3$ )  $\delta$  -111.12; HRMS (ESI)  $m/z$ :  $[M + \text{H}]^+$  Calcd for  $\text{C}_{15}\text{H}_{17}\text{FO}_3\text{S} + \text{H}^+$ : 297.0955; Found 297.0959.

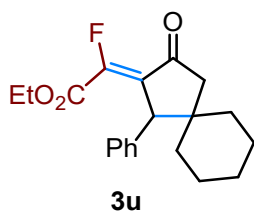

**Compound 3u:** 41 mg, 62% yield, colorless oil, *Z/E* = 8:1; Flash column chromatography conditions: petroleum ethers/EtOAc = 40:1;  $^1\text{H NMR}$  (600 MHz,  $\text{CDCl}_3$ )  $\delta$  7.29 – 7.26 (m, 2H), 7.23 – 7.20 (m, 1H), 7.06 (d,  $J = 7.5$  Hz, 2H), 4.32 (s, 1H), 4.16 (q,  $J = 7.1$  Hz, 2H), 2.51 (d,  $J = 18.5$  Hz, 1H), 2.43 (d,  $J = 18.5$  Hz, 1H), 1.59 – 1.39 (m, 5H), 1.31 – 1.19 (m, 6H), 1.15 – 1.11 (m, 2H);  $^{13}\text{C NMR}$  (101 MHz,  $\text{CDCl}_3$ )  $\delta$  204.34, 160.31 (d,  $J = 35.0$  Hz), 147.45 (d,  $J = 290.5$  Hz), 140.55 (d,  $J = 3.6$  Hz), 129.86 (d,  $J = 2.7$  Hz), 128.58, 128.18, 126.77, 62.33, 56.32, 47.22, 42.11, 38.62, 34.71, 25.60, 23.15, 22.45, 13.90;  $^{19}\text{F NMR}$  (565 MHz,  $\text{CDCl}_3$ )  $\delta$  -111.67; HRMS (ESI)  $m/z$ :  $[M + \text{H}]^+$  Calcd for  $\text{C}_{20}\text{H}_{23}\text{FO}_3 + \text{H}^+$ : 331.1704; Found 337.1694.

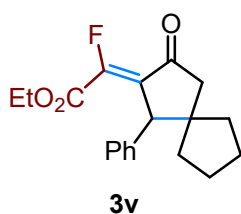

**Compound 3v:** 38 mg, 60% yield, yellow solid, *Z/E* = 8:1; Flash column chromatography conditions: petroleum ethers/EtOAc = 40:1; <sup>1</sup>H NMR (400 MHz, CDCl<sub>3</sub>) δ 7.29 (t, *J* = 7.3 Hz, 2H), 7.25 – 7.21 (m, 1H), 7.08 – 7.06 (m, 2H), 4.37 (s, 1H), 4.17 (q, *J* = 7.1 Hz, 2H), 2.63 (d, *J* = 18.2 Hz, 1H), 2.29 (dd, *J* = 18.2, 1.6 Hz, 1H), 1.82 – 1.63 (m, 4H), 1.42 – 1.35 (m, 1H), 1.25 (s, 2H), 1.21 (t, *J* = 7.1 Hz, 3H), 1.11 – 1.04 (m, 1H); <sup>13</sup>C NMR (151 MHz, CDCl<sub>3</sub>) δ 204.11, 160.29 (d, *J* = 34.8 Hz), 146.87 (d, *J* = 291.3 Hz), 141.81 (d, *J* = 3.5 Hz), 129.88 (d, *J* = 2.4 Hz), 128.29, 128.06, 126.77, 62.36, 54.60, 50.53, 49.01, 40.71, 34.60, 26.92, 23.55 (d, *J* = 5.0 Hz), 13.90; <sup>19</sup>F NMR (565 MHz, CDCl<sub>3</sub>) δ -112.12; HRMS (ESI) *m/z*: [*M* + H]<sup>+</sup> Calcd for C<sub>19</sub>H<sub>21</sub>FO<sub>3</sub>+H<sup>+</sup>: 317.1547; Found 317.1537.

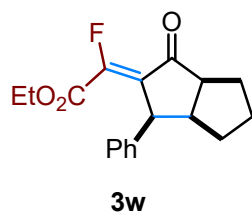

**Compound 3w:** 23 mg, 38% yield, yellow solid, *Z/E* = 11:1; *dr* = 3:1; Flash column chromatography conditions: petroleum ethers/EtOAc = 50:1; <sup>1</sup>H NMR (400 MHz, Chloroform-*d*) δ 7.31 – 7.27 (m, 2H), 7.22 – 7.18 (m, 1H), 7.15 – 7.13 (m, 2H), 4.52 (s, 1H), 4.19 – 4.14 (m, 2H), 2.95 – 2.89 (m, 1H), 2.76 – 2.44 (m, 1H), 2.24 – 1.84 (m, 4H), 1.43 – 1.22 (m, 2H), 1.17 (t, *J* = 7.1 Hz, 3H); <sup>13</sup>C NMR (101 MHz, Chloroform-*d*) δ 208.66, 160.37 (d, *J* = 35.0 Hz), 147.46 (d, *J* = 291.0 Hz), 144.85 (d, *J* = 3.6 Hz), 128.75, 128.18 (d, *J* = 9.1 Hz), 126.69, 126.53, 62.43, 52.06, 49.54, 48.86, 34.37, 29.78, 25.97, 13.84; <sup>19</sup>F NMR (377 MHz, Chloroform-*d*) δ -110.41; HRMS (ESI) *m/z*: [*M* + H]<sup>+</sup> Calcd for C<sub>18</sub>H<sub>19</sub>FO<sub>3</sub>+H<sup>+</sup>: 303.1391; Found 303.1399.

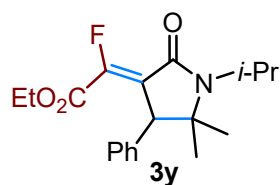

**Compound 3y:** 31 mg, 46% yield, white solid, mp 121-123 °C, *Z/E* = 14:1; Flash column chromatography conditions: petroleum ethers/EtOAc = 20:1; <sup>1</sup>H NMR (400 MHz, CDCl<sub>3</sub>) δ 7.28 – 7.21 (m, 3H), 7.11 (d, *J* = 6.7 Hz, 2H), 4.29 (s, 1H), 4.13 (q, *J* = 7.1 Hz, 2H), 3.50 – 3.43 (m, 1H),

1.51 (d,  $J = 6.8$  Hz, 3H), 1.45 (d,  $J = 6.8$  Hz, 3H), 1.37 (s, 3H), 1.19 (t,  $J = 7.1$  Hz, 3H), 0.83 (s, 3H);  $^{13}\text{C}$  NMR (101 MHz,  $\text{CDCl}_3$ )  $\delta$  164.43, 160.43 (d,  $J = 33.6$  Hz), 147.15 (d,  $J = 281.4$  Hz), 140.64 (d,  $J = 3.6$  Hz), 128.31, 128.02, 127.98, 127.15, 63.50, 61.94, 53.87, 45.32, 30.09, 23.85, 20.22, 19.93, 13.94;  $^{19}\text{F}$  NMR (377 MHz,  $\text{CDCl}_3$ )  $\delta$  -121.15; HRMS (ESI)  $m/z$ :  $[M + \text{H}]^+$  Calcd for  $\text{C}_{19}\text{H}_{24}\text{FNO}_3 + \text{H}^+$ : 334.1813; Found 334.1817.

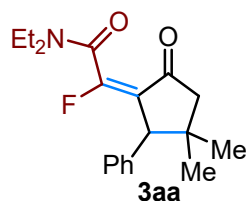

**Compound 3aa:** 33 mg, 52% yield, yellow oil,  $Z/E = 1:5$ ; Flash column chromatography conditions: petroleum ethers/EtOAc = 20:1;  $^1\text{H}$  NMR (600 MHz, Chloroform- $d$ )  $\delta$  7.30 (t,  $J = 7.4$  Hz, 2H), 7.25 – 7.22 (m, 1H), 7.10 – 7.09 (m, 2H), 3.92 (d,  $J = 3.3$  Hz, 1H), 3.53 – 3.43 (m, 2H), 3.20 – 3.25 (m, 2H), 2.43 (d,  $J = 17.6$  Hz, 1H), 2.25 (d,  $J = 17.6$  Hz, 1H), 1.24 (t,  $J = 7.2$  Hz, 3H), 1.19 (s, 3H), 1.12 (t,  $J = 7.2$  Hz, 3H), 0.73 (s, 3H);  $^{13}\text{C}$  NMR (151 MHz, Chloroform- $d$ )  $\delta$  204.23 (d,  $J = 14.9$  Hz), 160.66 (d,  $J = 29.8$  Hz), 157.65 (d,  $J = 291.5$  Hz), 139.08, 128.29, 128.24, 127.04, 121.25 (d,  $J = 9.1$  Hz), 55.12, 52.74, 42.69, 39.16, 38.80, 29.61, 24.96, 14.17, 12.18;  $^{19}\text{F}$  NMR (377 MHz, Chloroform- $d$ )  $\delta$  -96.10, -98.87; HRMS (ESI)  $m/z$ :  $[M + \text{H}]^+$  Calcd for  $\text{C}_{19}\text{H}_{24}\text{FNO}_2 + \text{H}^+$ : 318.1864; Found 318.1866.

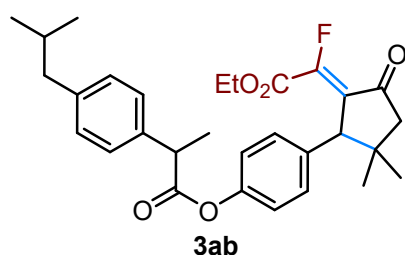

**Compound 3ab:** 50 mg, 51% yield, yellow oil,  $Z/E = 11:1$ ; Flash column chromatography conditions: petroleum ethers/EtOAc = 30:1;  $^1\text{H}$  NMR (400 MHz,  $\text{CDCl}_3$ )  $\delta$  7.28 (d,  $J = 8.1$  Hz, 2H), 7.14 (d,  $J = 8.1$  Hz, 2H), 7.01 (d,  $J = 8.6$  Hz, 2H), 6.94 (d,  $J = 8.7$  Hz, 2H), 4.26 (s, 1H), 4.16 – 4.08 (m, 2H), 3.92 (q,  $J = 7.2$  Hz, 1H), 2.49 – 2.44 (m, 3H), 2.20 (dd,  $J = 17.9, 1.4$  Hz, 1H), 1.86 (dt,  $J = 13.5, 6.8$  Hz, 1H), 1.59 (d,  $J = 7.1$  Hz, 3H), 1.18 (t,  $J = 7.2$  Hz, 6H), 0.91 (d,  $J = 6.6$  Hz, 6H), 0.76 (s, 3H);  $^{13}\text{C}$  NMR (101 MHz,  $\text{CDCl}_3$ )  $\delta$  203.87, 173.15, 160.15 (d,  $J = 34.9$  Hz), 149.67, 147.70 (d,

$J = 291.7$  Hz), 140.87, 138.66 (d,  $J = 3.4$  Hz), 137.16, 129.53, 129.42 (d,  $J = 2.8$  Hz), 128.94, 127.20, 121.25, 62.44, 55.73, 51.25, 45.25, 45.05, 38.51, 30.71, 30.20, 25.29, 22.40, 18.46, 13.88;  $^{19}\text{F}$  NMR (377 MHz,  $\text{CDCl}_3$ )  $\delta$  -110.71; HRMS (ESI)  $m/z$ :  $[M + \text{H}]^+$  Calcd for  $\text{C}_{30}\text{H}_{35}\text{FO}_5 + \text{H}^+$ : 495.2541; Found 495.2549.

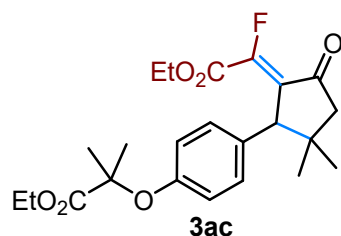

**Compound 3ac:** 48 mg, 57% yield, yellow oil,  $Z/E = 16:1$ ; Flash column chromatography conditions: petroleum ethers/EtOAc = 20:1;  $^1\text{H}$  NMR (400 MHz,  $\text{CDCl}_3$ )  $\delta$  6.92 (d,  $J = 8.6$  Hz, 2H), 6.78 (d,  $J = 8.7$  Hz, 2H), 4.26 - 4.21 (m, 3H), 4.18 - 4.09 (m, 2H), 2.48 (d,  $J = 18.0$  Hz, 1H), 2.19 (dd,  $J = 17.9, 1.4$  Hz, 1H), 1.58 (s, 6H), 1.24 (t,  $J = 7.1$  Hz, 3H), 1.19 (t,  $J = 7.1$  Hz, 6H), 0.76 (s, 3H);  $^{13}\text{C}$  NMR (101 MHz,  $\text{CDCl}_3$ )  $\delta$  204.15, 174.16, 160.25 (d,  $J = 35.3$  Hz), 154.22, 147.56 (d,  $J = 290.0$  Hz), 135.00, 129.71, 128.81, 118.99, 79.18, 62.31, 61.40, 55.59, 51.28, 38.49, 30.66, 25.37 (d,  $J = 10.1$  Hz), 25.24, 13.96 (d,  $J = 19.6$  Hz);  $^{19}\text{F}$  NMR (377 MHz,  $\text{CDCl}_3$ )  $\delta$  -111.09; HRMS (ESI)  $m/z$ :  $[M + \text{H}]^+$  Calcd for  $\text{C}_{23}\text{H}_{29}\text{FO}_6 + \text{H}^+$ : 421.2021; Found 421.2023.

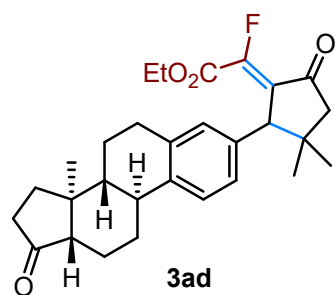

**Compound 3ad:** 59 mg, 61% yield, yellow oil,  $Z/E = 16:1$ ; Flash column chromatography conditions: petroleum ethers/EtOAc = 30:1;  $^1\text{H}$  NMR (400 MHz,  $\text{CDCl}_3$ )  $\delta$  7.16 (d,  $J = 8.1$  Hz, 1H), 6.82 (d,  $J = 8.1$  Hz, 1H), 6.70 (s, 1H), 4.20 (s, 1H), 4.14 (q,  $J = 7.1$  Hz, 2H), 2.85 - 2.83 (m, 2H), 2.52 - 2.45 (m, 2H), 2.19 - 1.91 (m, 6H), 1.64 - 1.43 (m, 6H), 1.40 (s, 1H), 1.24 - 1.17 (m, 6H), 0.90 (s, 3H), 0.78 (d,  $J = 1.5$  Hz, 3H);  $^{13}\text{C}$  NMR (101 MHz,  $\text{CDCl}_3$ )  $\delta$  204.46, 160.35 (d,  $J = 35.0$  Hz), 147.31 (d,  $J = 292.2$  Hz), 138.56, 138.20, 136.24, 129.99, 128.38, 125.99, 125.09, 125.06,

62.33, 55.94, 51.20, 50.54, 47.97, 44.26 (d,  $J = 1.9$  Hz), 38.50, 38.07, 35.84, 31.60, 30.83, 29.44 (d,  $J = 3.1$  Hz), 26.91, 26.51, 25.60, 25.36 (d,  $J = 2.9$  Hz), 21.58, 13.88;  $^{19}\text{F}$  NMR (377 MHz,  $\text{CDCl}_3$ )  $\delta$  -111.76 (d,  $J = 10.5$  Hz); HRMS (ESI)  $m/z$ :  $[M + \text{H}]^+$  Calcd for  $\text{C}_{29}\text{H}_{35}\text{FNO}_4 + \text{H}^+$ : 427.2592; Found 427.2594.

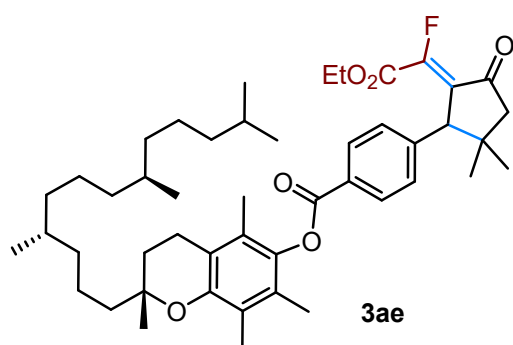

**Compound 3ae:** 87 mg, 58% yield, yellow oil,  $Z/E = 8:1$ ; Flash column chromatography conditions: petroleum ethers/EtOAc = 30:1;  $^1\text{H}$  NMR (400 MHz,  $\text{CDCl}_3$ )  $\delta$  8.18 (d,  $J = 8.4$  Hz, 2H), 7.23 (d,  $J = 8.1$  Hz, 2H), 4.39 (s, 1H), 4.18 (q,  $J = 7.1$  Hz, 2H), 2.62 (t,  $J = 6.8$  Hz, 2H), 2.54 (d,  $J = 18.1$  Hz, 1H), 2.27 (dd,  $J = 18.0, 1.4$  Hz, 1H), 2.12 (s, 3H), 2.05 (s, 3H), 2.01 (s, 3H), 1.60 – 1.03 (m, 35H), 0.87 (d,  $J = 6.7$  Hz, 12H);  $^{13}\text{C}$  NMR (101 MHz,  $\text{CDCl}_3$ )  $\delta$  203.47, 164.86, 160.18 (d,  $J = 34.3$  Hz), 148.31 (d,  $J = 242.0$  Hz), 146.37, 140.57, 130.20, 129.15, 128.45, 128.28, 126.88, 125.12, 123.16, 117.51, 75.11, 62.56, 56.38, 51.30, 39.39, 38.75, 37.46, 37.30, 32.82, 30.93, 28.00, 25.41, 24.83, 24.47, 22.75, 22.66, 21.05, 20.65, 19.78, 19.69, 13.91, 13.10, 12.26, 11.88;  $^{19}\text{F}$  NMR (377 MHz,  $\text{CDCl}_3$ )  $\delta$  -110.22; HRMS (ESI)  $m/z$ :  $[M + \text{H}]^+$  Calcd for  $\text{C}_{47}\text{H}_{67}\text{FO}_6 + \text{H}^+$ : 747.4994; Found 747.5004.

### 3. Mechanistic Experiments

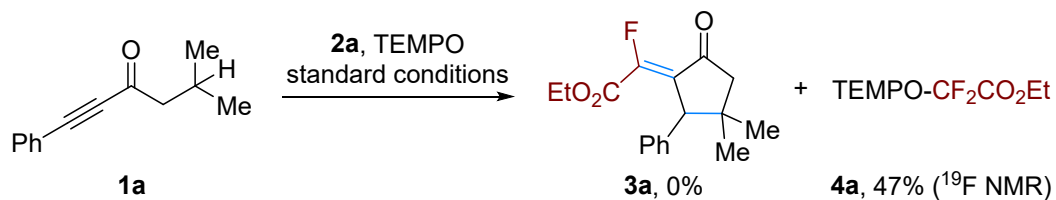

To a mixture of  $\text{Cu}(\text{MeCN})_4\text{PF}_6$  (14.9 mg, 0.04 mmol), **L1** (18.9 mg, 0.08 mmol), **2a** (142.1 mg, 0.7 mmol), TEMPO (125 mg, 0.8 mmol) and  $\text{K}_2\text{CO}_3$  (55.3 mg, 0.4 mmol) in 2 mL of DCM was added **1a** (37.2 mg, 0.2 mmol) under nitrogen atmosphere. After stirring at 80 °C for 17 h, the reaction mixture was quenched with water, extracted with DCM, washed with brine, dried over anhydrous  $\text{Na}_2\text{SO}_4$ , and concentrated to give **4a** in 47%  $^{19}\text{F}$  NMR yield using  $\text{PhCF}_3$  as the internal standard.

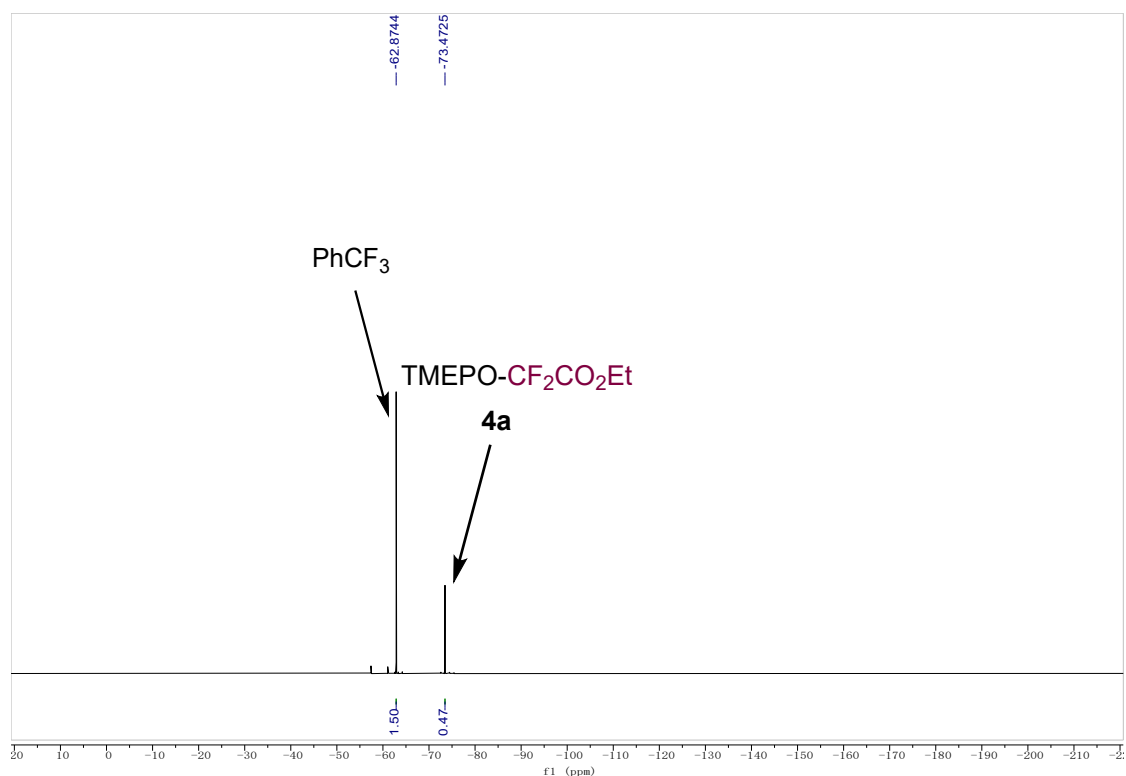



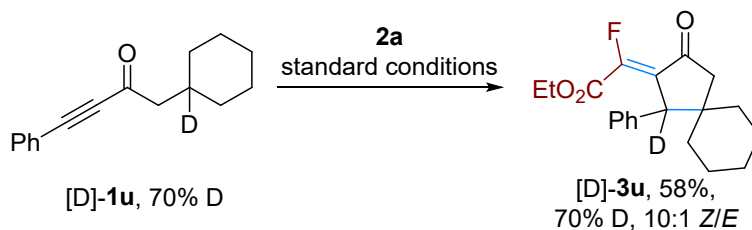

To a mixture of  $\text{Cu}(\text{MeCN})_4\text{PF}_6$  (14.9 mg, 0.04 mmol), **L1** (18.9 mg, 0.08 mmol), **2a** (142.1 mg, 0.7 mmol) and  $\text{K}_2\text{CO}_3$  (55.3 mg, 0.4 mmol) in 2 mL of DCM was added **[D]-1u** (45.4 mg, 0.2 mmol) under nitrogen atmosphere. After stirring at 80 °C for 17 h, the reaction mixture was quenched with water, extracted with DCM, washed with brine, dried over anhydrous  $\text{Na}_2\text{SO}_4$ . Column chromatography on silica gel (petroleum ethers/EtOAc = 40:1) gave 38 mg (58% yield) of **[D]-3u**, 70% D, as yellow oil;  $^1\text{H NMR}$  (400 MHz,  $\text{CDCl}_3$ )  $\delta$  7.23 (d,  $J = 6.9$  Hz, 1H), 7.19 (d,  $J = 7.2$  Hz, 0H), 7.03 (d,  $J = 7.4$  Hz, 1H), 4.29 (s, 0H), 4.12 (q,  $J = 7.2$  Hz, 1H), 2.48 (d,  $J = 18.6$  Hz, 0H), 2.40 (d,  $J = 18.3$  Hz, 0H), 1.53 – 1.31 (m, 4H), 1.22 – 1.09 (m, 3H), 0.89 – 0.84 (m, 1H);  $^{13}\text{C NMR}$  (151 MHz,  $\text{CDCl}_3$ )  $\delta$  204.32, 160.30 (d,  $J = 35.1$  Hz), 147.42 (d,  $J = 290.5$  Hz), 140.54 (d,  $J = 3.5$  Hz), 129.85 (d,  $J = 2.7$  Hz), 128.57, 128.17, 126.76, 62.33, 56.32, 47.20, 42.10, 38.61, 34.70, 25.60, 23.15, 22.45, 13.91;  $^{19}\text{F NMR}$  (565 MHz,  $\text{CDCl}_3$ )  $\delta$  -111.70; HRMS (ESI)  $m/z$ :  $[\text{M} + \text{H}]^+$  Calcd for  $\text{C}_{20}\text{H}_{22}\text{DFO}_3 + \text{H}^+$ : 332.1767; Found 332.1765.

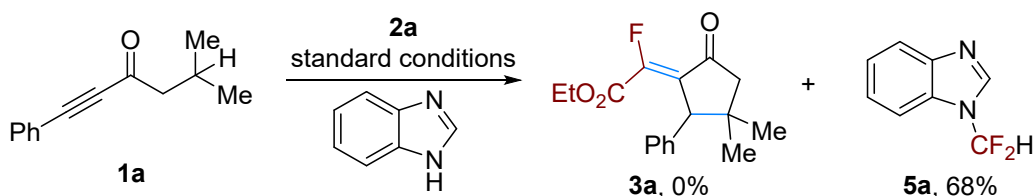

To a mixture of  $\text{Cu}(\text{MeCN})_4\text{PF}_6$  (14.9 mg, 0.04 mmol), **L1** (18.9 mg, 0.08 mmol), **2a** (142.1 mg, 0.7 mmol), benzimidazole (118 mg, 1.0 mmol) and  $\text{K}_2\text{CO}_3$  (55.3 mg, 0.4 mmol) in 2 mL of DCM was added **1a** (37.2 mg, 0.2 mmol) under nitrogen atmosphere. After stirring at 80 °C for 17 h, the reaction mixture was quenched with water, extracted with DCM, washed with brine, dried over anhydrous  $\text{Na}_2\text{SO}_4$ . Column chromatography on silica gel (petroleum ethers/EtOAc = 10:1) gave 23 mg (68% yield) of **5a**; as yellow oil;  $^1\text{H NMR}$  (600 MHz,  $\text{CDCl}_3$ )  $\delta$  8.12 (s, 1H), 7.86 – 7.83 (m, 1H), 7.62 – 7.60 (m, 1H), 7.44 – 7.34 (m, 3H);  $^{13}\text{C NMR}$  (151 MHz,  $\text{CDCl}_3$ )  $\delta$  143.91, 139.07, 130.55, 124.81, 124.17, 120.98, 111.08, 108.97 (t,  $J = 250.0$  Hz);  $^{19}\text{F NMR}$  (377 MHz,  $\text{CDCl}_3$ )  $\delta$  -93.70; HRMS (ESI)  $m/z$ :  $[\text{M} + \text{H}]^+$  Calcd for  $\text{C}_8\text{H}_6\text{F}_2\text{N}_2 + \text{H}^+$ : 169.0572; Found 169.0570.

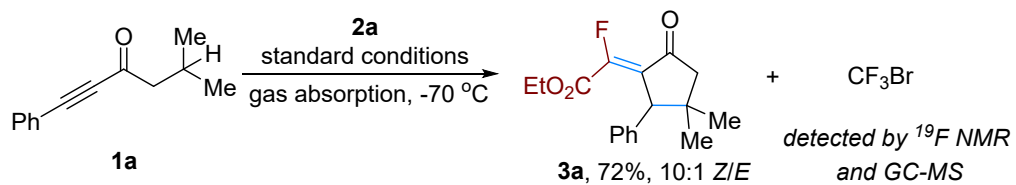

To a mixture of  $\text{Cu}(\text{MeCN})_4\text{PF}_6$  (14.9 mg, 0.04 mmol), **L1** (18.9 mg, 0.08 mmol), **2a** (142.1 mg, 0.7 mmol) and  $\text{K}_2\text{CO}_3$  (55.3 mg, 0.4 mmol) in 2 mL of  $\text{CD}_3\text{CN}$  was added **1a** (37.2 mg, 0.2 mmol) under nitrogen atmosphere. After completion of the reaction, the gas in the reaction vessel was bubbled into a sealed tube with  $\text{CDCl}_3$  cooled to  $-70\text{ }^\circ\text{C}$  and then subjected to  $^{19}\text{F}$  NMR and analysis using  $\text{PhCF}_3$  as the internal standard and GC-MS analysis, the signal of  $\text{CF}_3\text{Br}$  was detected at low temperature.

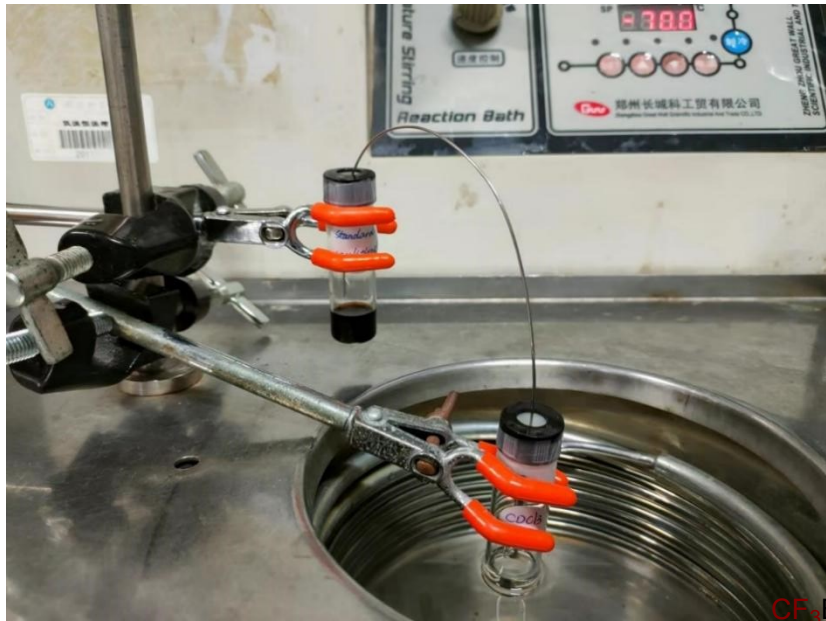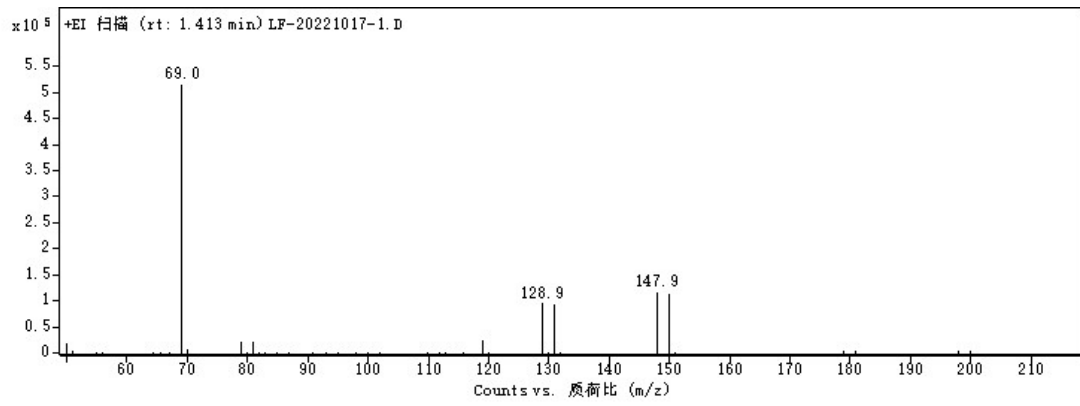

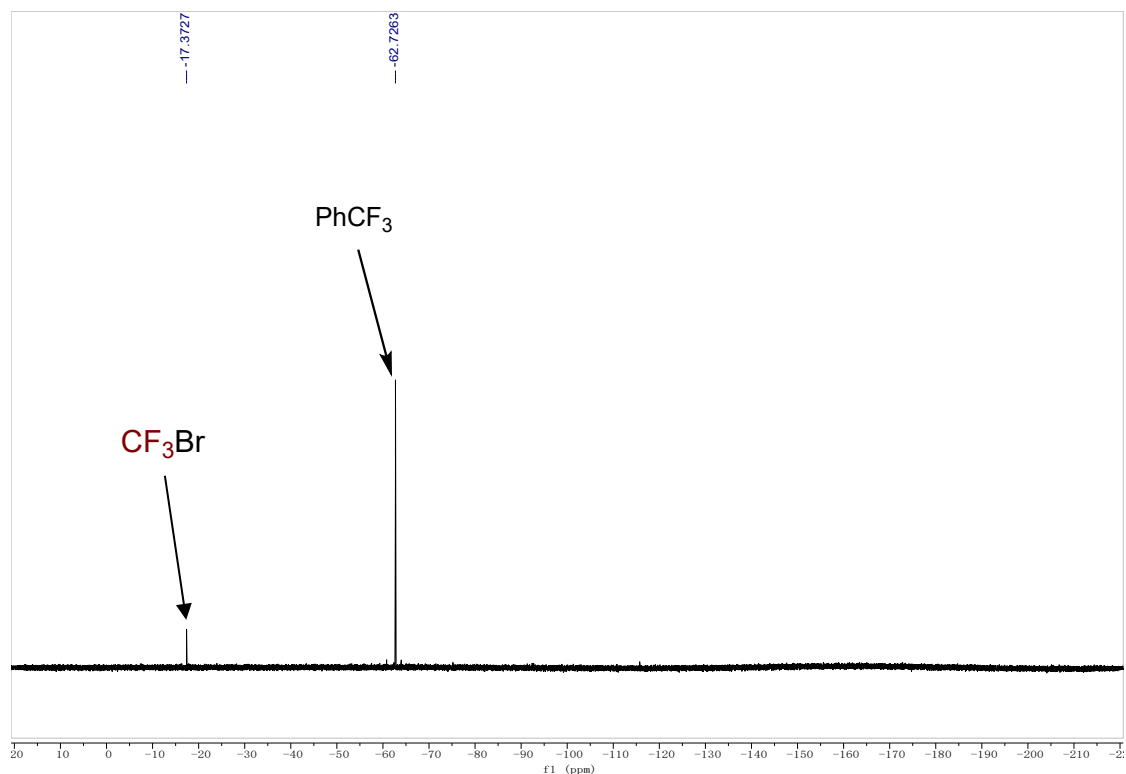

### Determination of the KIE Values

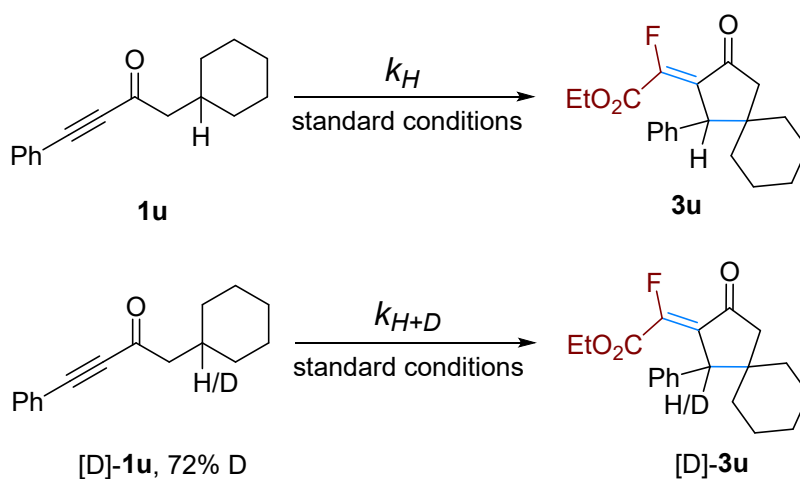

The method to calculate KIE is according to the reported method<sup>2</sup> through parallel reactions of **1u** and **[D]-1u** (72% D) using the general procedure with *N,N*-Dimethyltrifluoroacetamide as the internal standard.

<sup>2</sup> a) X.-H. Yang, R. Davison, S.-Z. Nie, Cruz, F. A., T. M. McGinnis and V. M. Dong, Catalytic hydrothiolation: counterion-controlled regioselectivity. *J. Am. Chem. Soc.* 2019, **141**, 3006; b) C. Obradors, R. M. Martinez and R. A. Shenvi, Ph(*i*-PrO) SiH<sub>2</sub>: An exceptional reductant for metal-catalyzed hydrogen atom transfers, *J. Am. Chem. Soc.* **138**, 4962-4971 (2016).

|                     |    |     |     |     |     |
|---------------------|----|-----|-----|-----|-----|
| time (min)          | 15 | 30  | 45  | 60  | 75  |
| yield of <i>H</i>   | 8% | 14% | 20% | 26% | 30% |
| yield of <i>H+D</i> | 5% | 8%  | 11% | 14% | 18% |

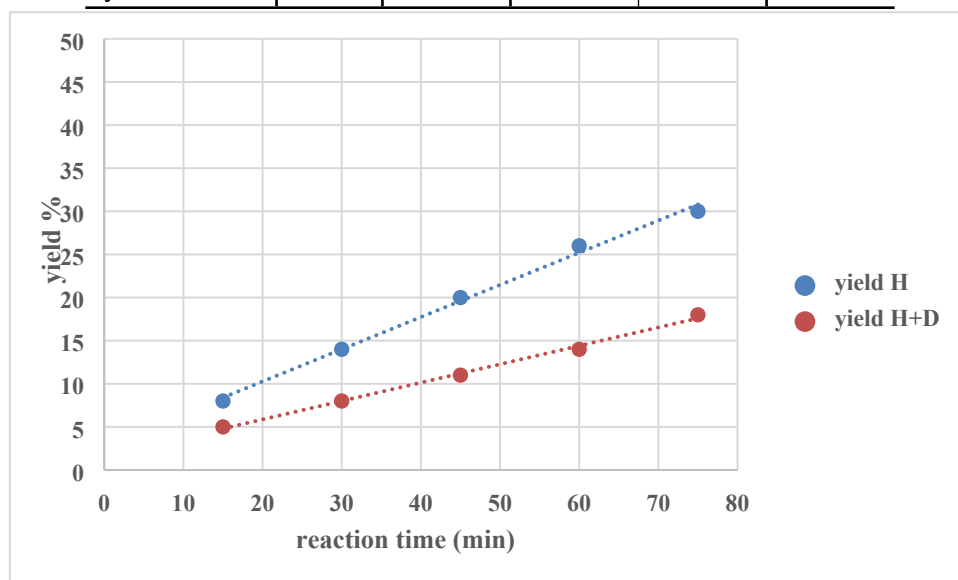

Adjusted initial rates:

$$k_H = 0.3733$$

$$k_H * 28\% + k_D * 72\% = 0.2133$$

$$k_D = 0.1511$$

$$\text{KIE} = k_H/k_D = 2.47$$

Competitive reactions of **1u** and [D]-**1u** (72% D) were conducted under the standard conditions with *N,N*-Dimethyltrifluoroacetamide as the internal standard.

|                   |    |    |     |     |     |
|-------------------|----|----|-----|-----|-----|
| time (min)        | 15 | 30 | 45  | 60  | 75  |
| yield of <i>H</i> | 4% | 9% | 12% | 16% | 19% |
| yield of <i>D</i> | 1% | 3% | 4%  | 6%  | 8%  |

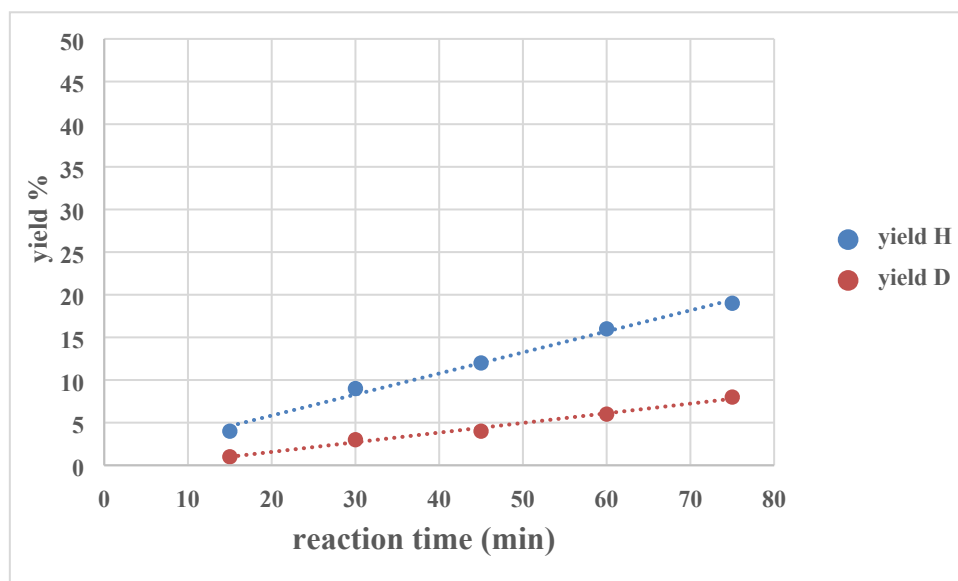

$$\text{KIE} = k_{\text{H}}/k_{\text{D}} = 2.18$$

---

<sup>2</sup> Frisch, M. J.; Trucks, G. W.; Schlegel, H. B.; Scuseria, G. E.; Robb, M. A.; Cheeseman, J. R.; Scalmani, G.; Barone, V.; Petersson, G. A.; Nakatsuji, H.; Li, X.; Caricato, M.; Marenich, A. V.; Bloino, J.; Janesko, B. G.; Gomperts, R.; Mennucci, B.; Hratchian, H. P.; Ortiz, J. V.; Izmaylov, A. F.; Sonnenberg, J. L.; Williams-Young, D.; Ding, F.; Lipparini, F. Egidi, F.; Goings, J.; Peng, B.; Petrone, A.; Henderson, T.; Ranasinghe, D.; Zakrzewski, V. G.; Gao, J.; Rega, N.; Zheng, G.; Liang, W.; Hada, M.; Ehara, M.; Toyota, K.; Fukuda, R.; Hasegawa, J.; Ishida, M.; Nakajima, T.; Honda, Y.; Kitao, O.; Nakai, H.; Vreven, T.; Throssell, K.; Montgomery, Jr., J. A.; Peralta, J. E.; Ogliaro, F.; Bearpark, M. J.; Heyd, J. J.; Brothers, E. N.; Kudin, K. N.; Staroverov, V. N.; Keith, T. A.; Kobayashi, R.; Normand, J.; Raghavachari, K.; Rendell, A. P.; Burant, J. C.; Iyengar, S. S.; Tomasi, J.; Cossi, M.; Millam, J. M.; Klene, M.; Adamo, C.; Cammi, R.; Ochterski, J. W.; Martin, R. L.; Morokuma, K.; Farkas, O.; Foresman, J. B.; and Fox, D. J. *Gaussian 16, Revision A.03*, Gaussian, Inc., Wallingford CT, 2016.

#### 4. NMR Spectra

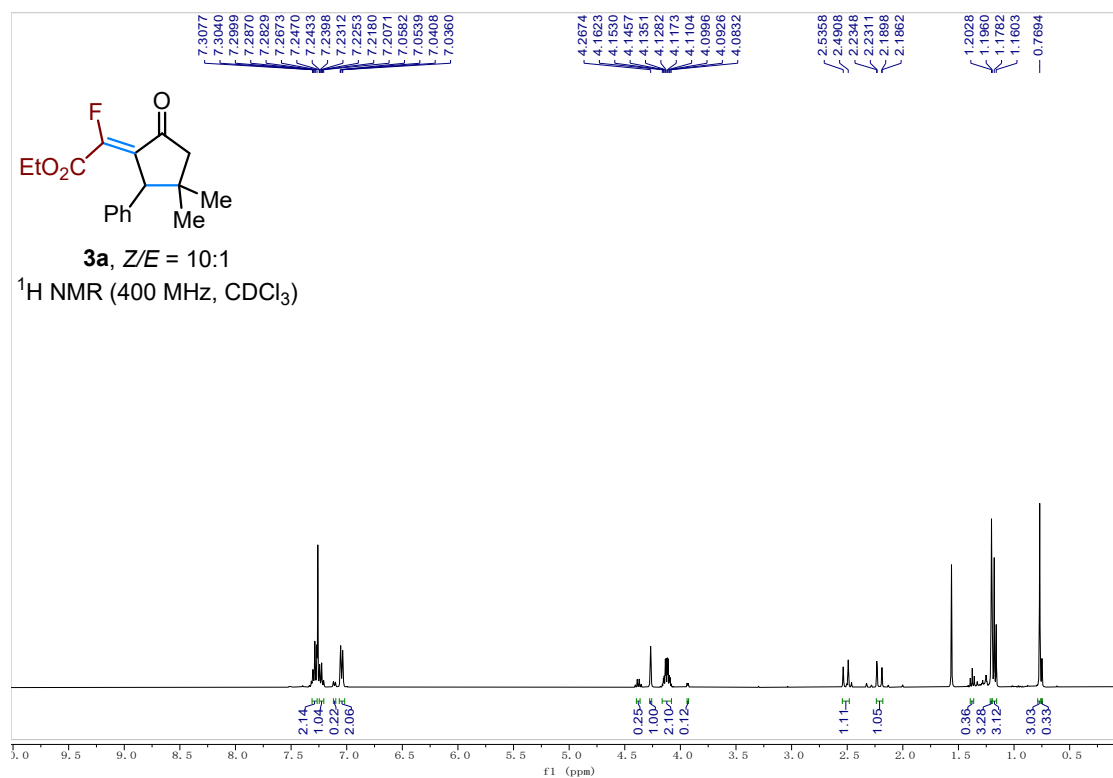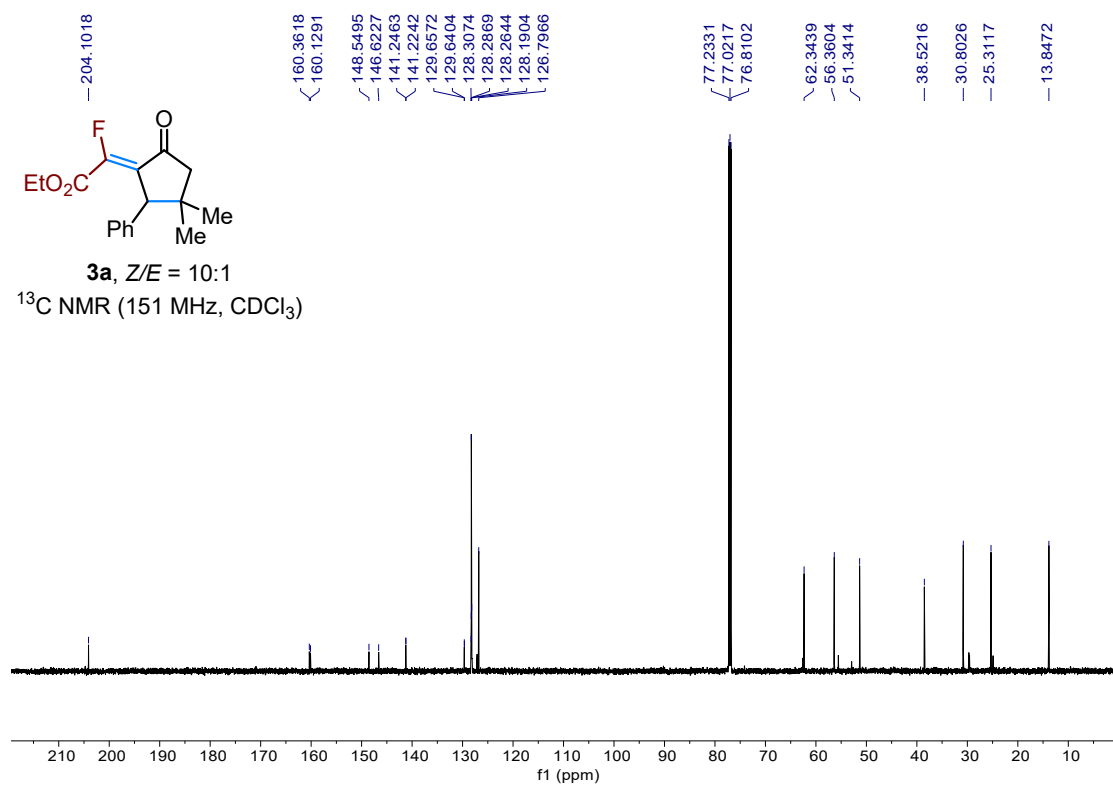

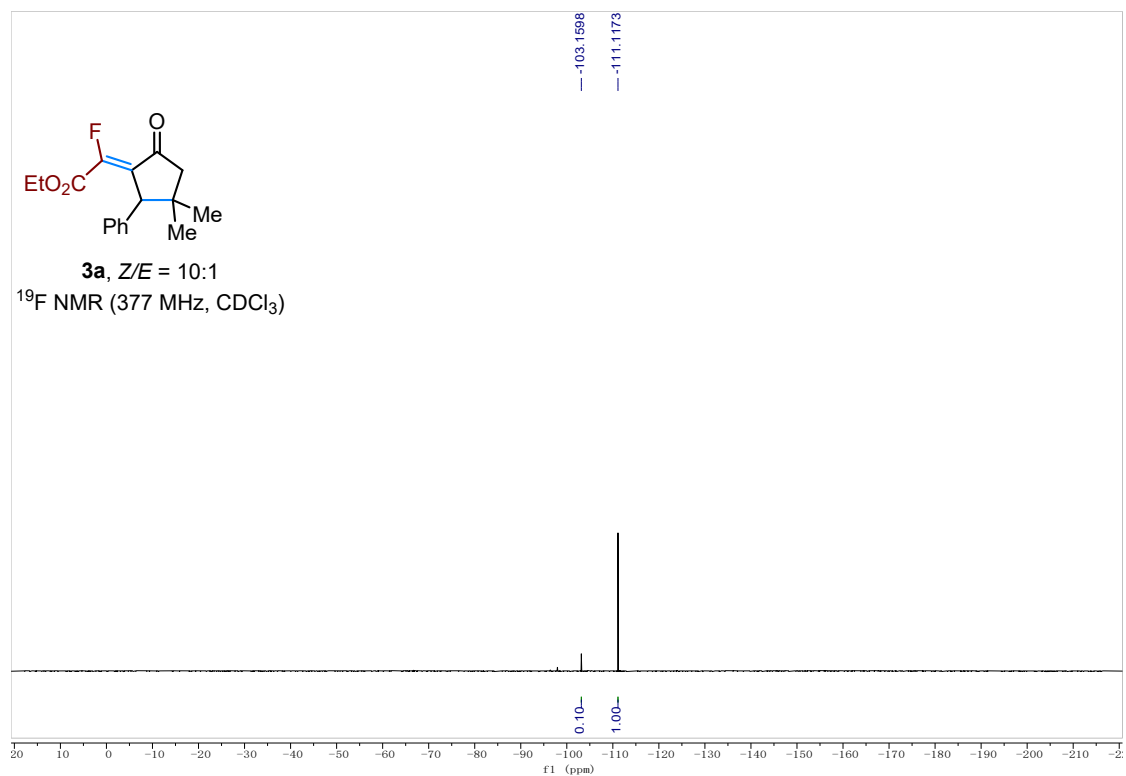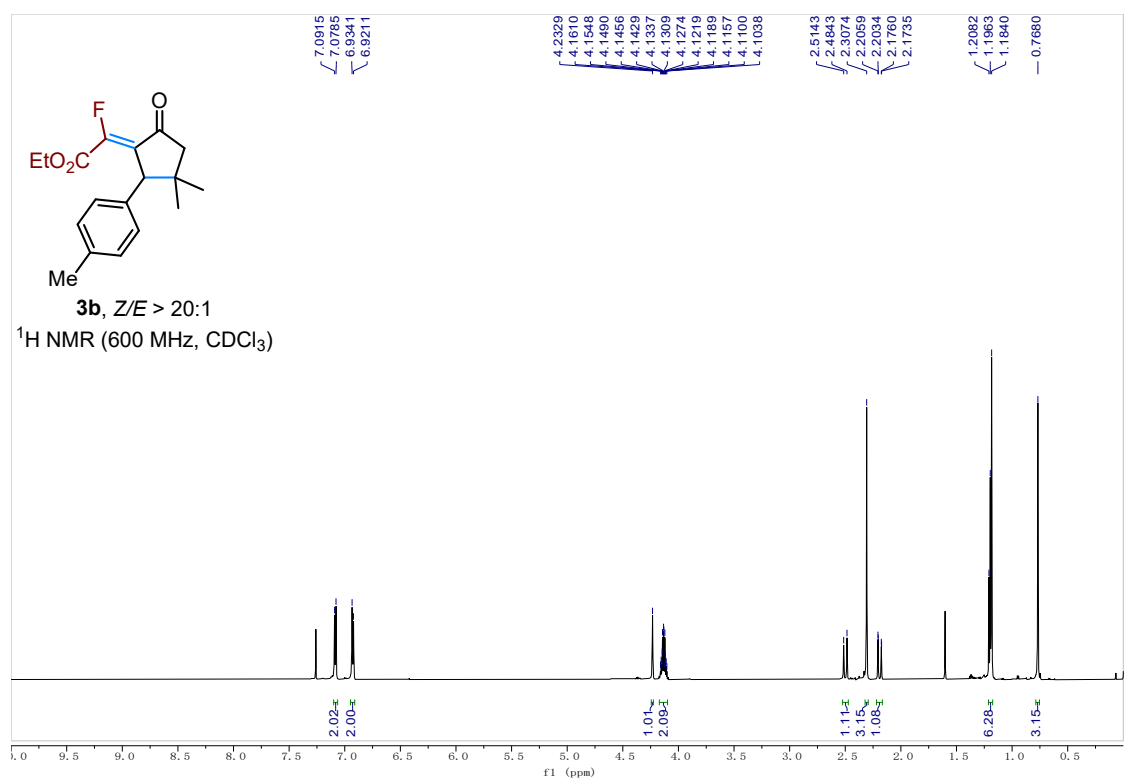



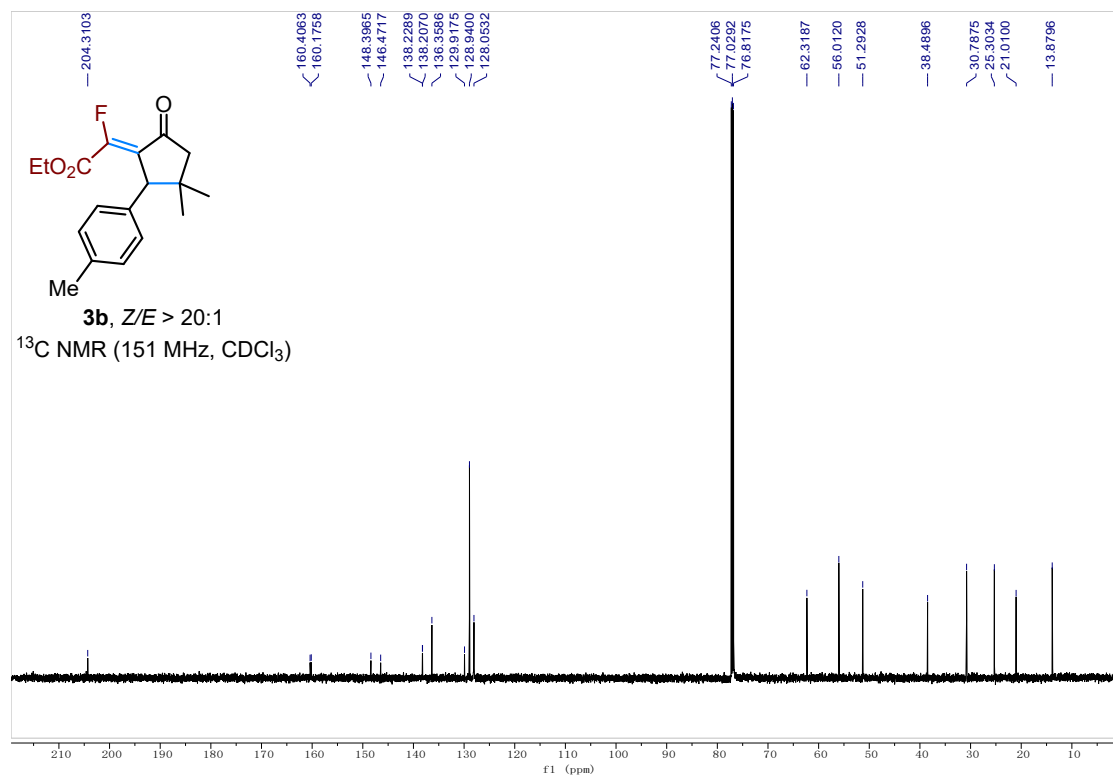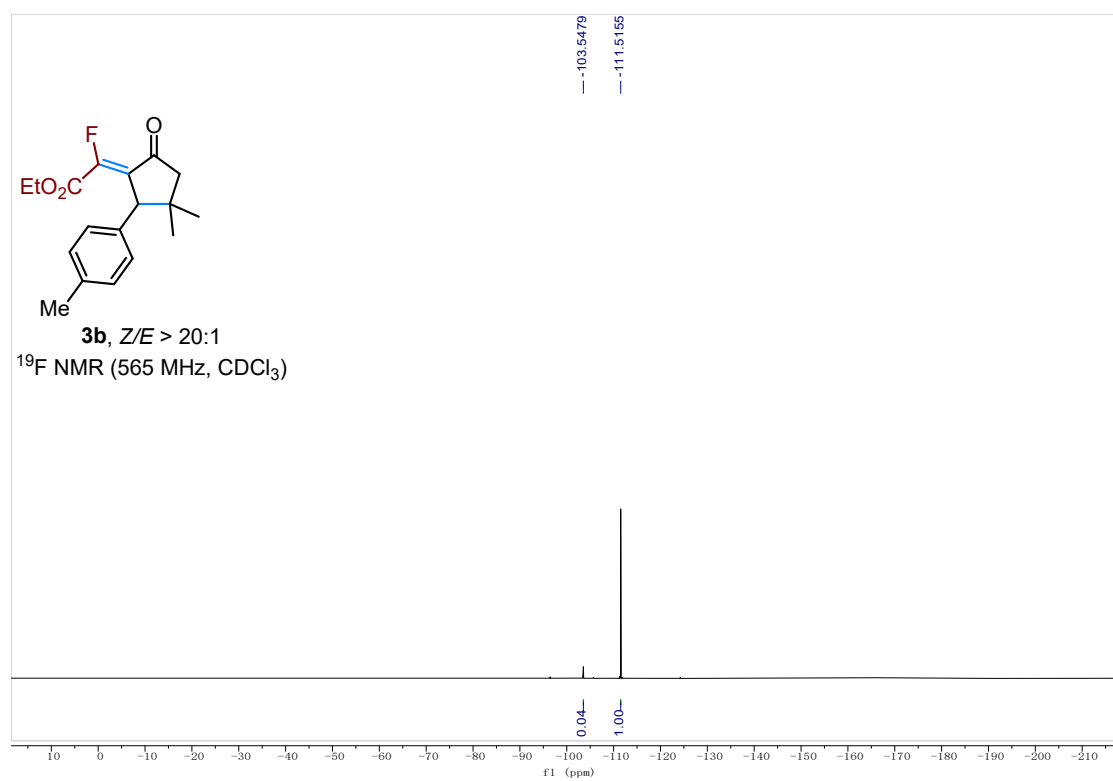

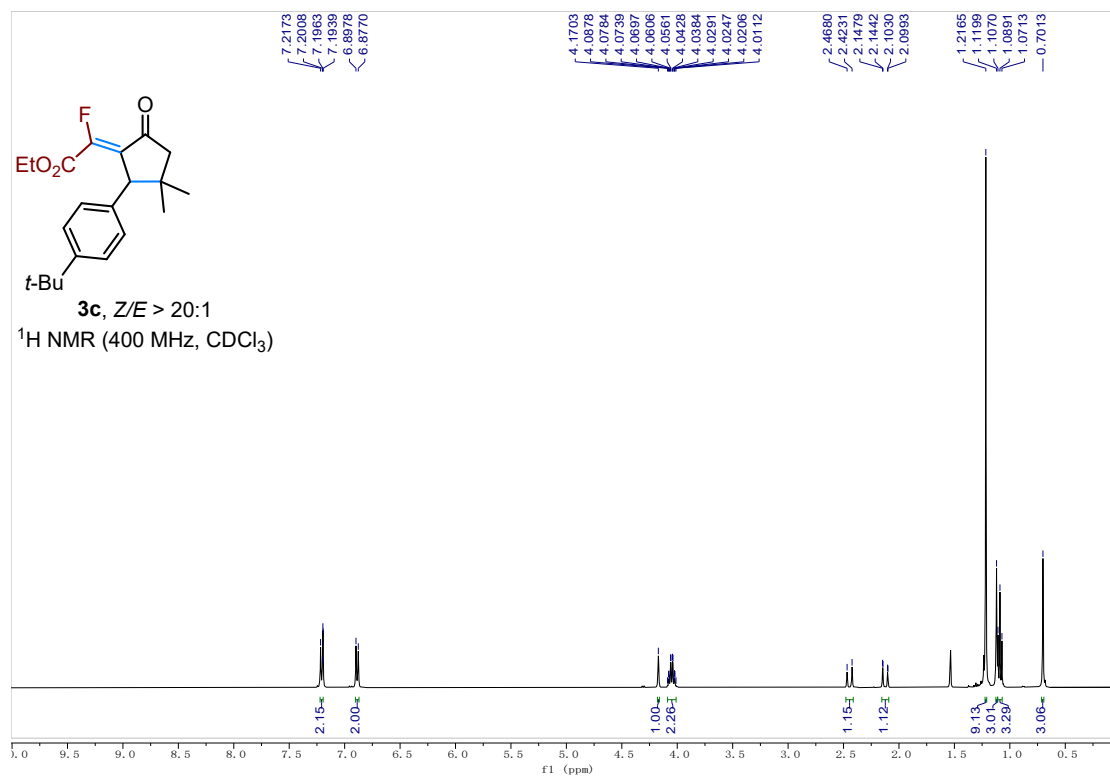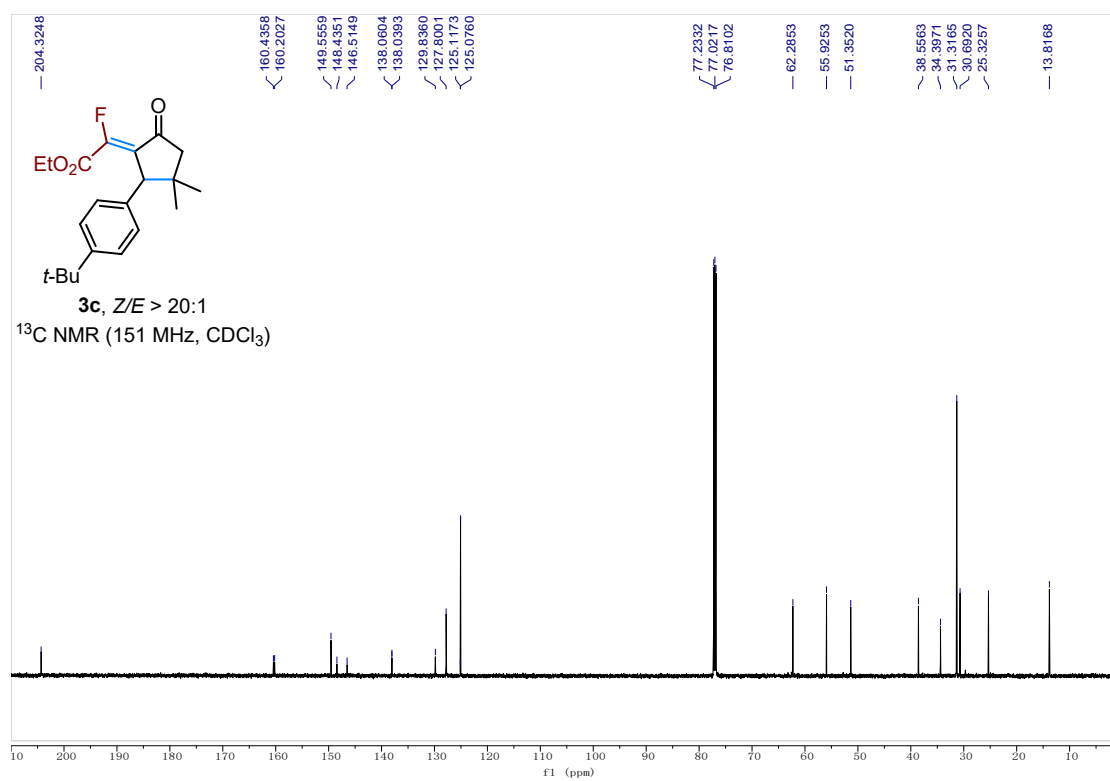

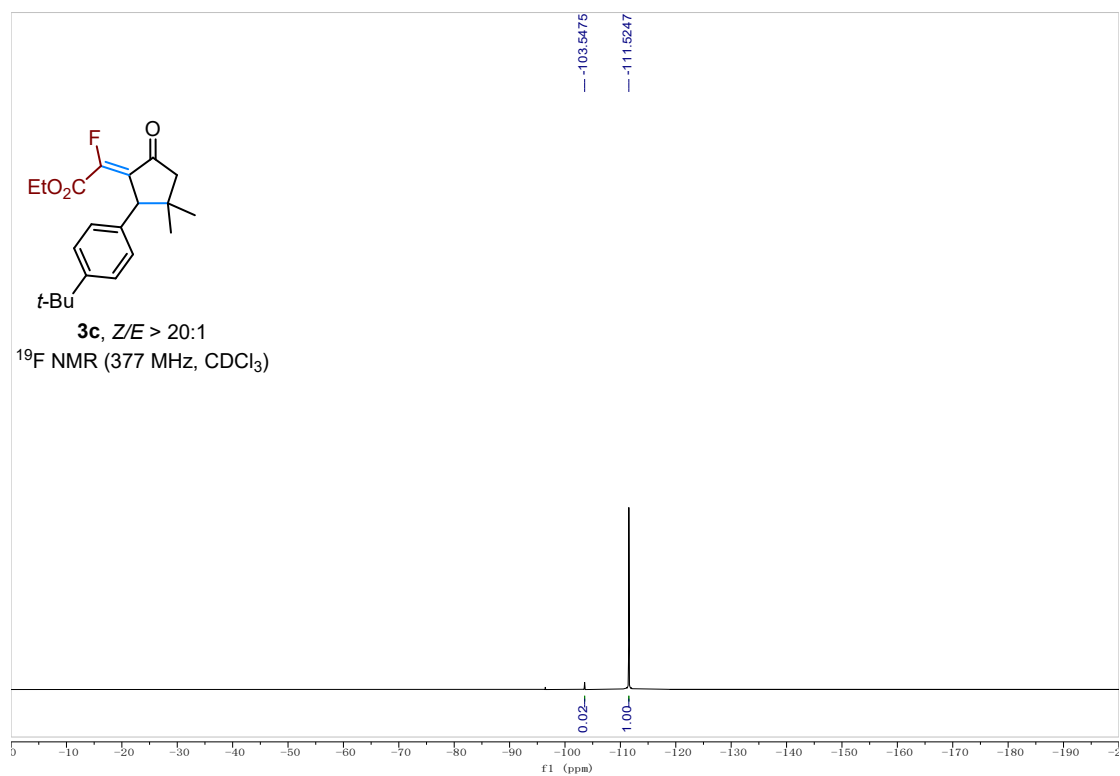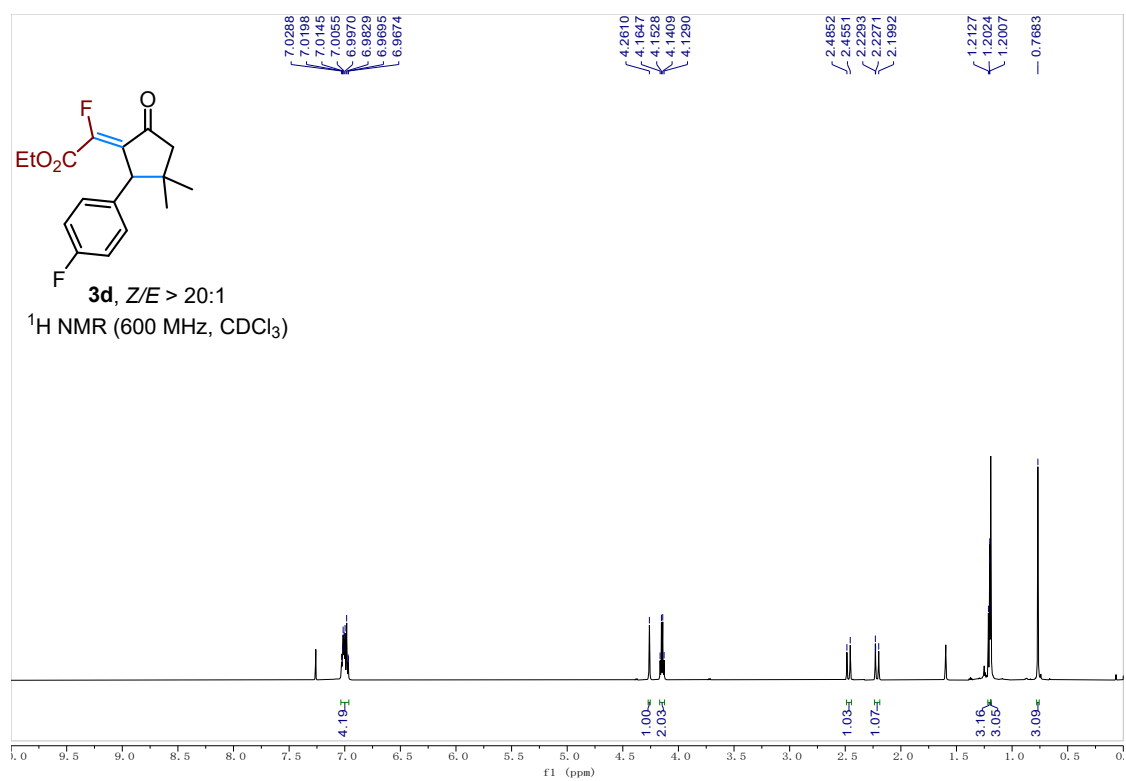

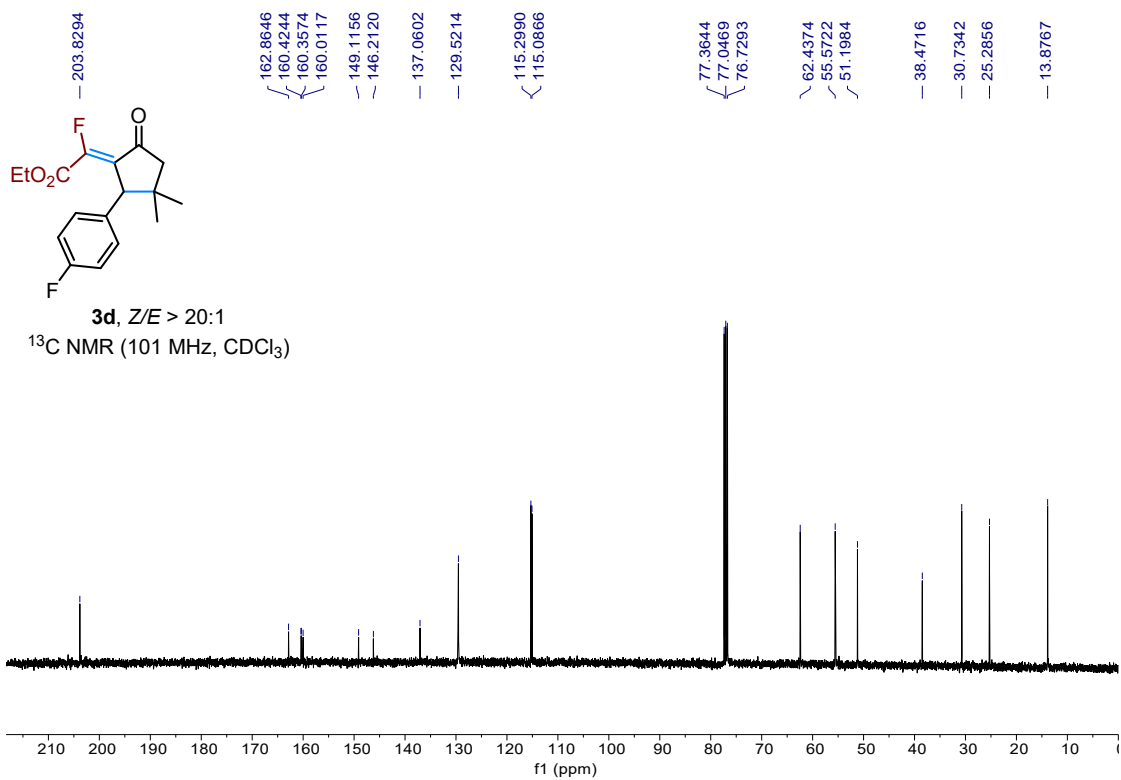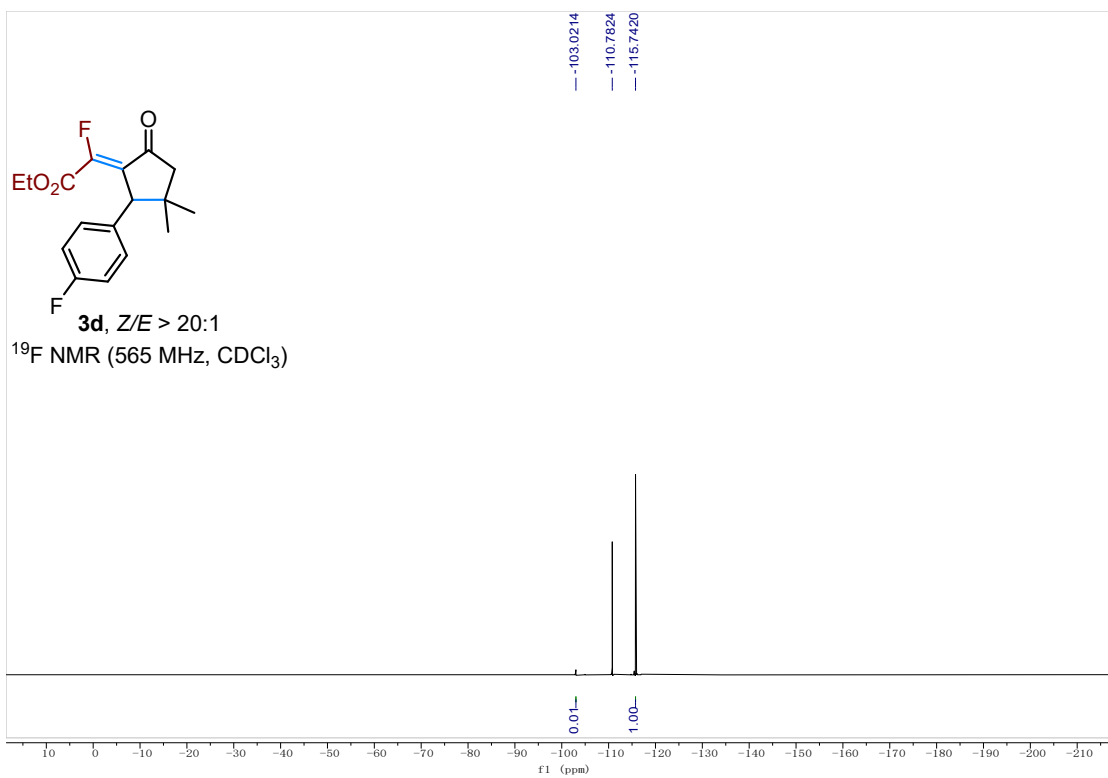

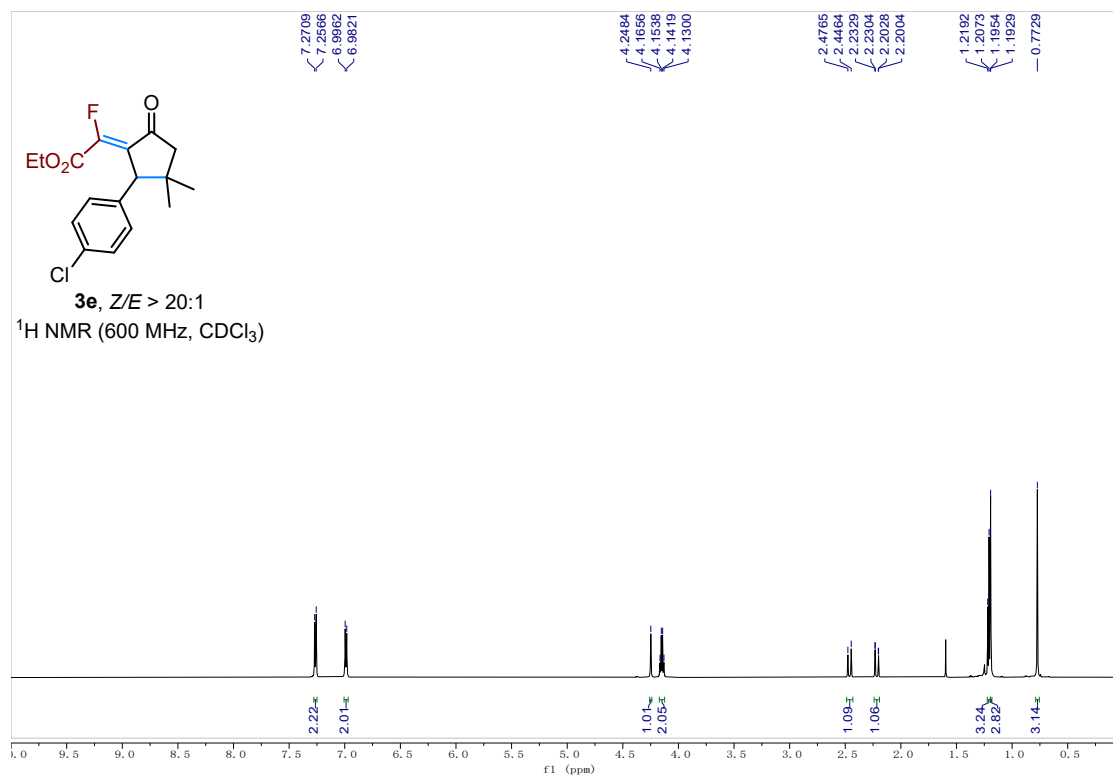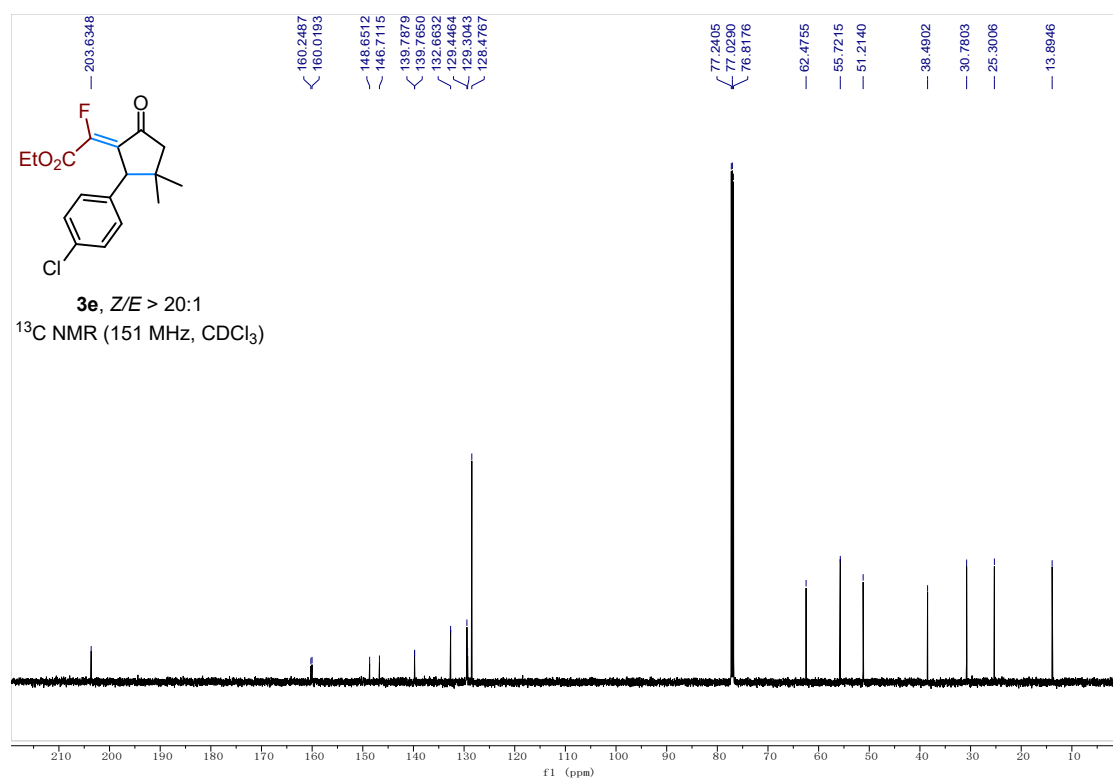

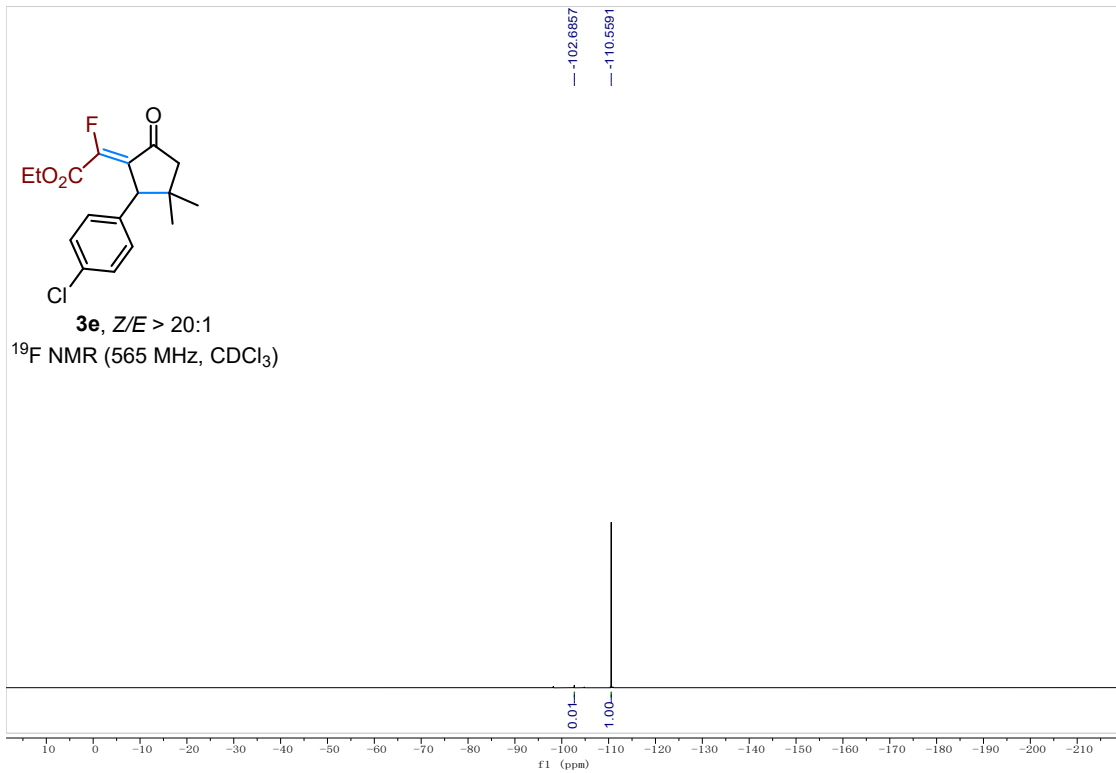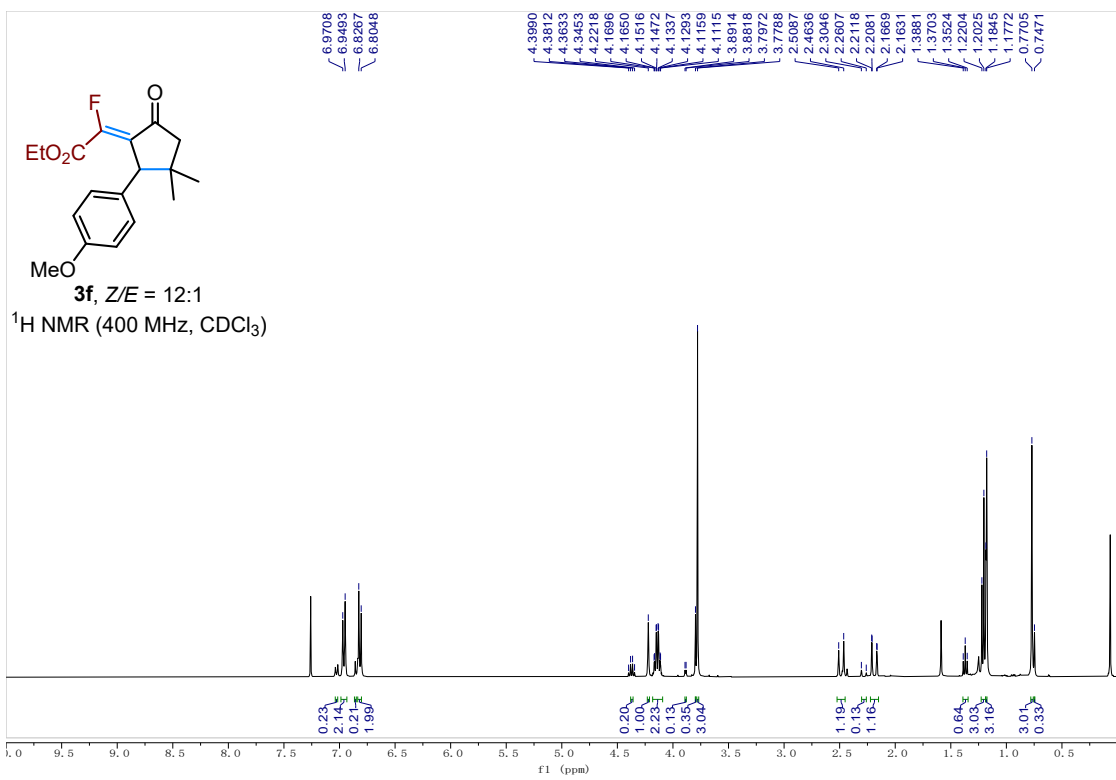

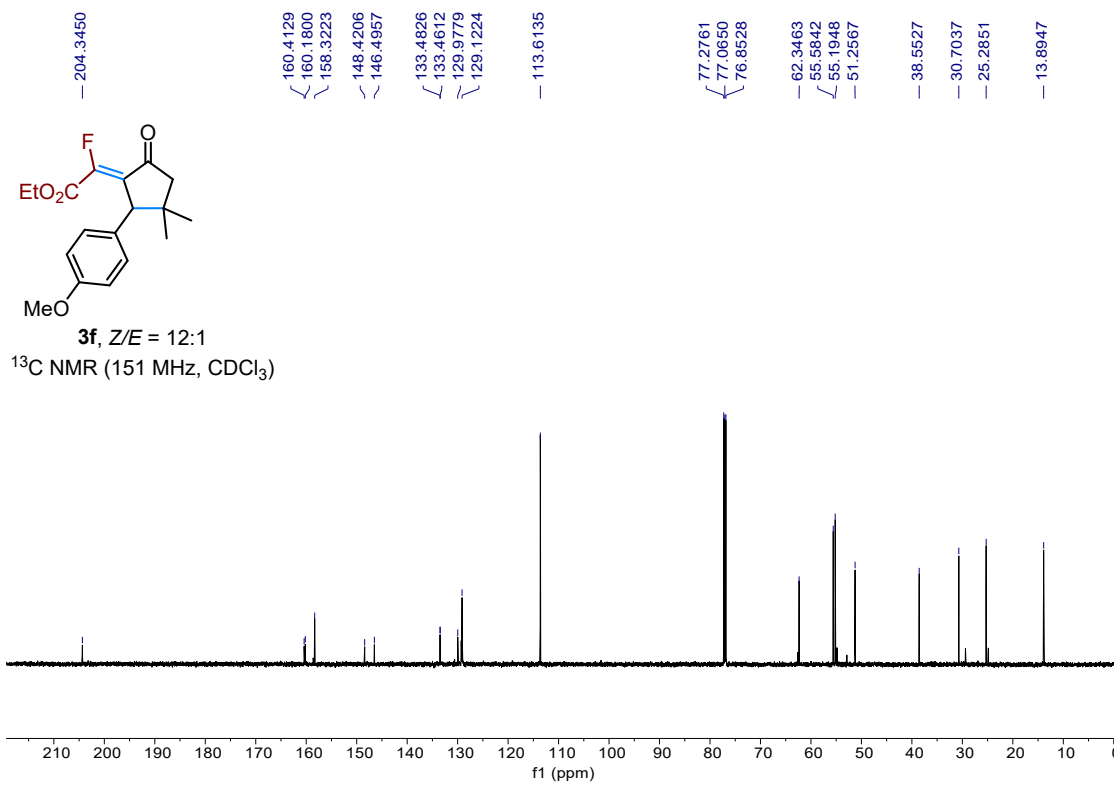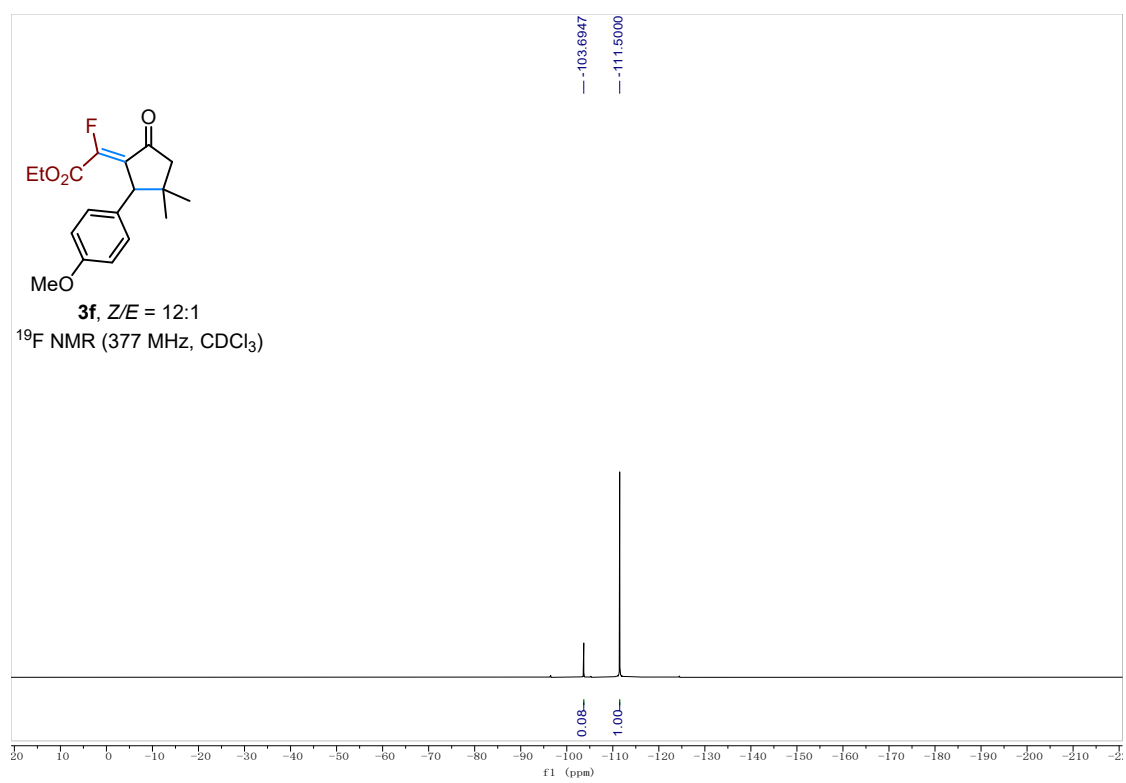

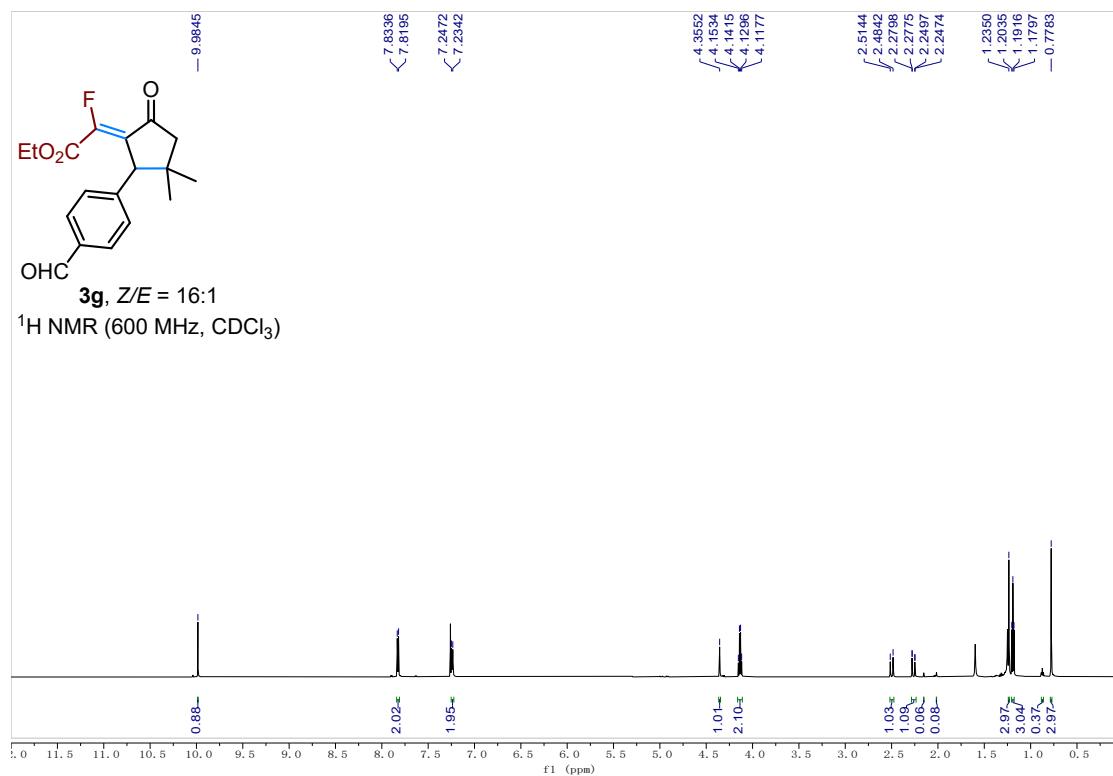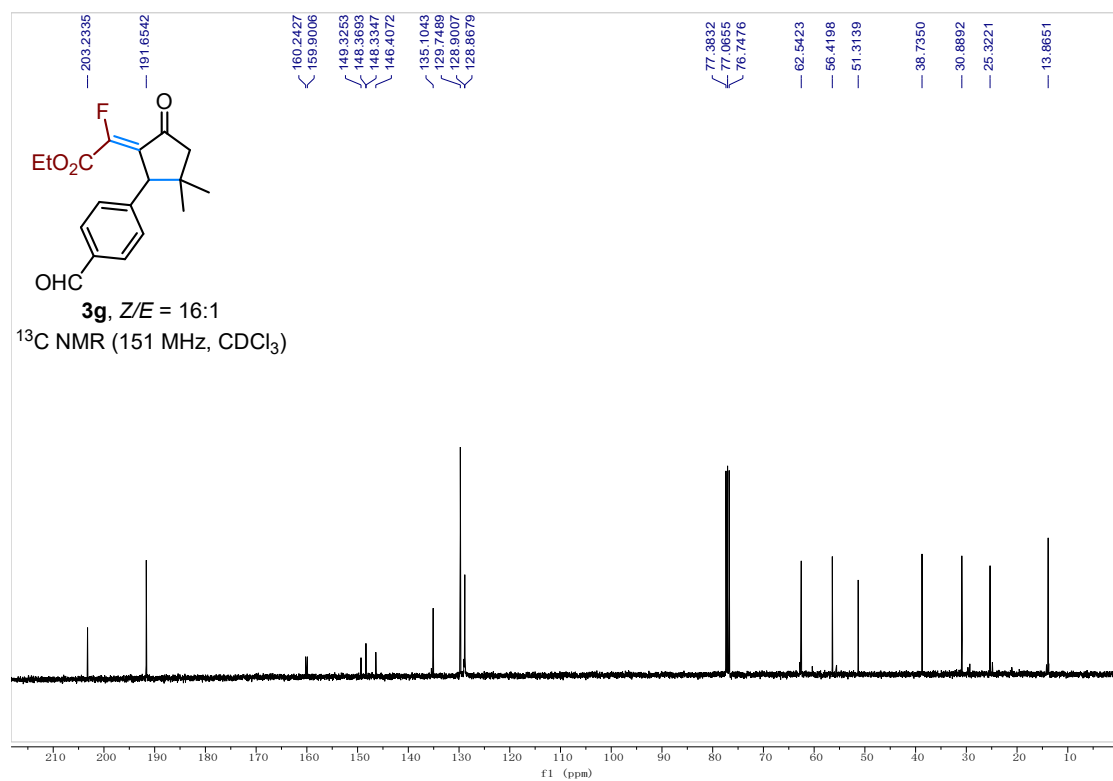



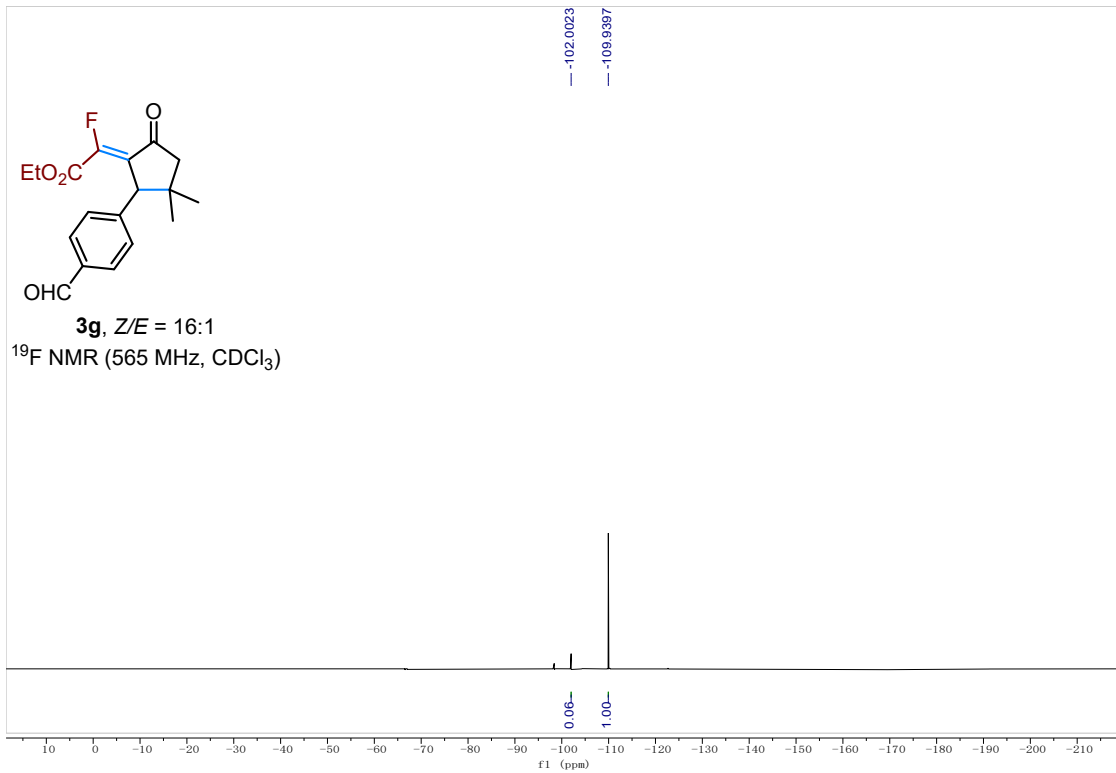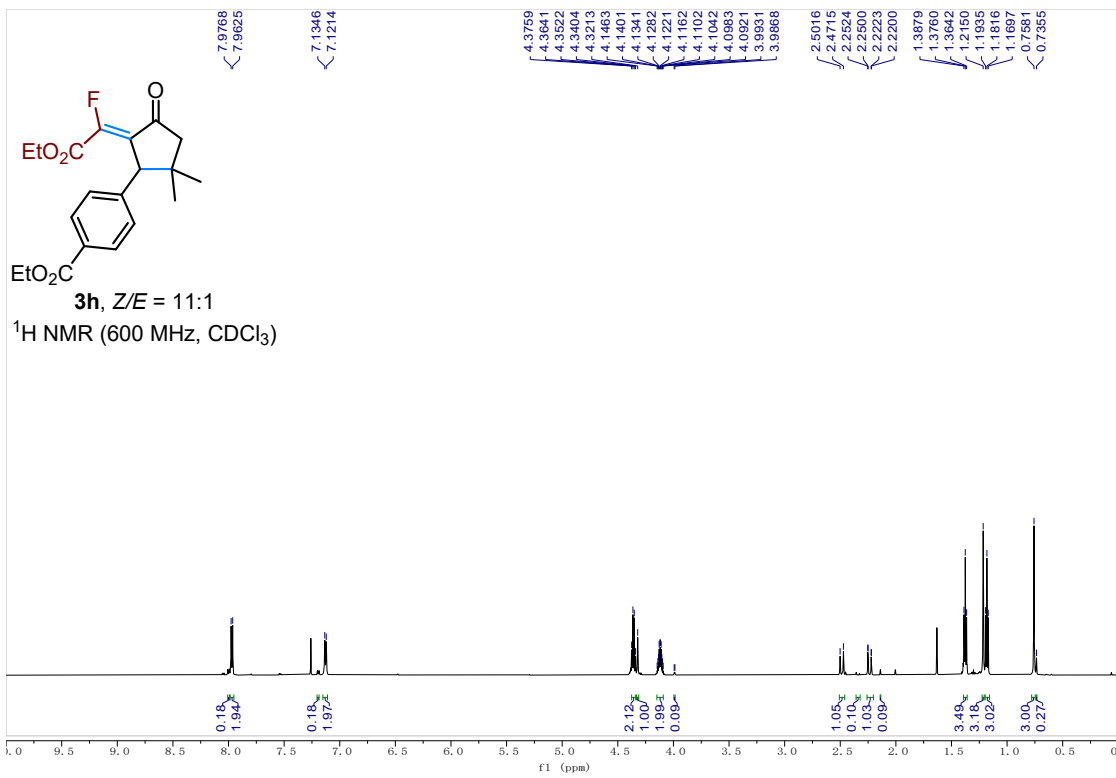

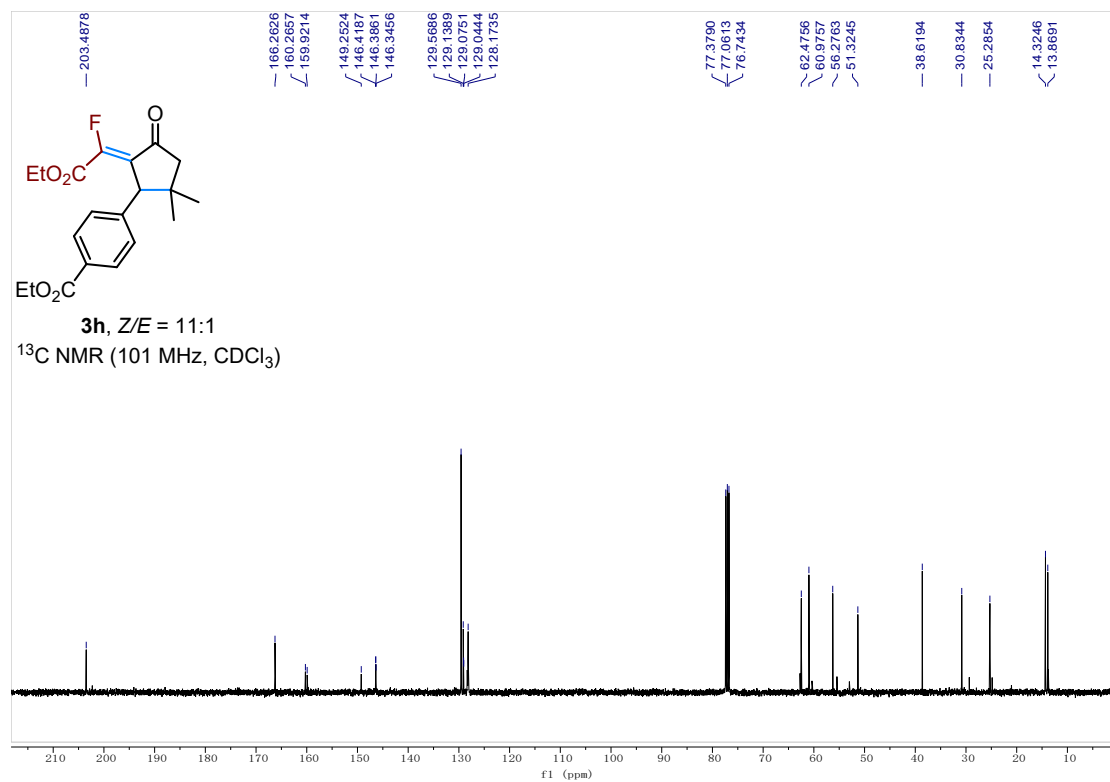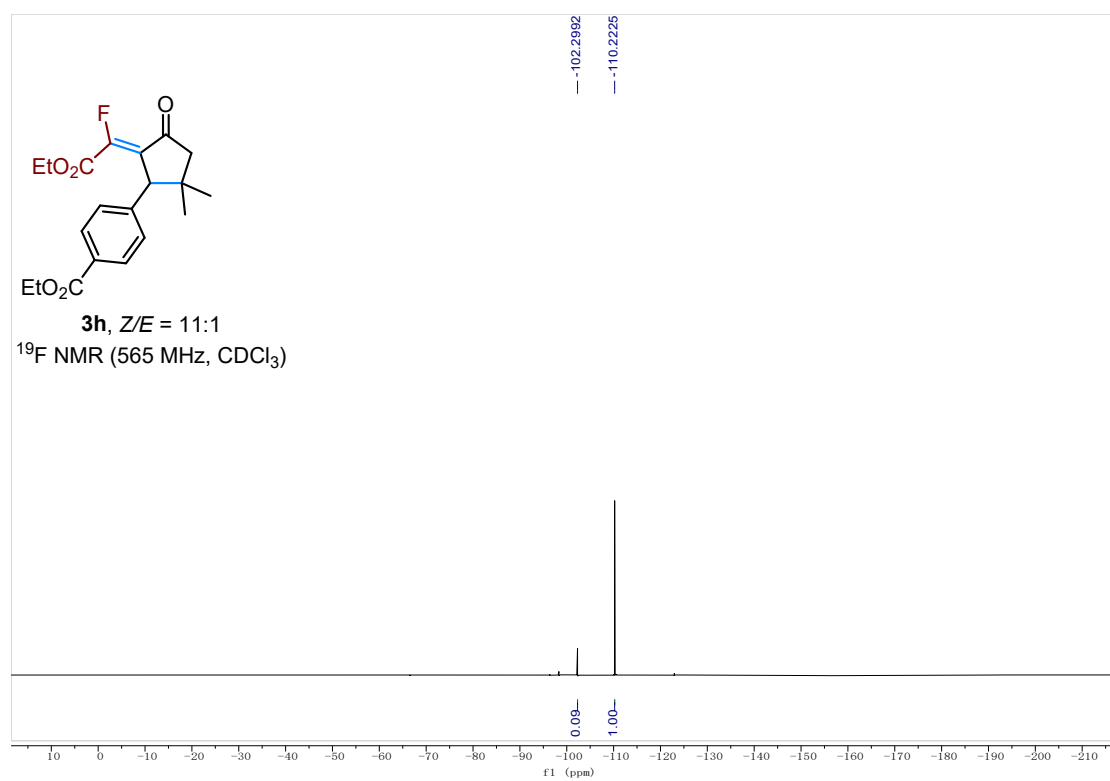

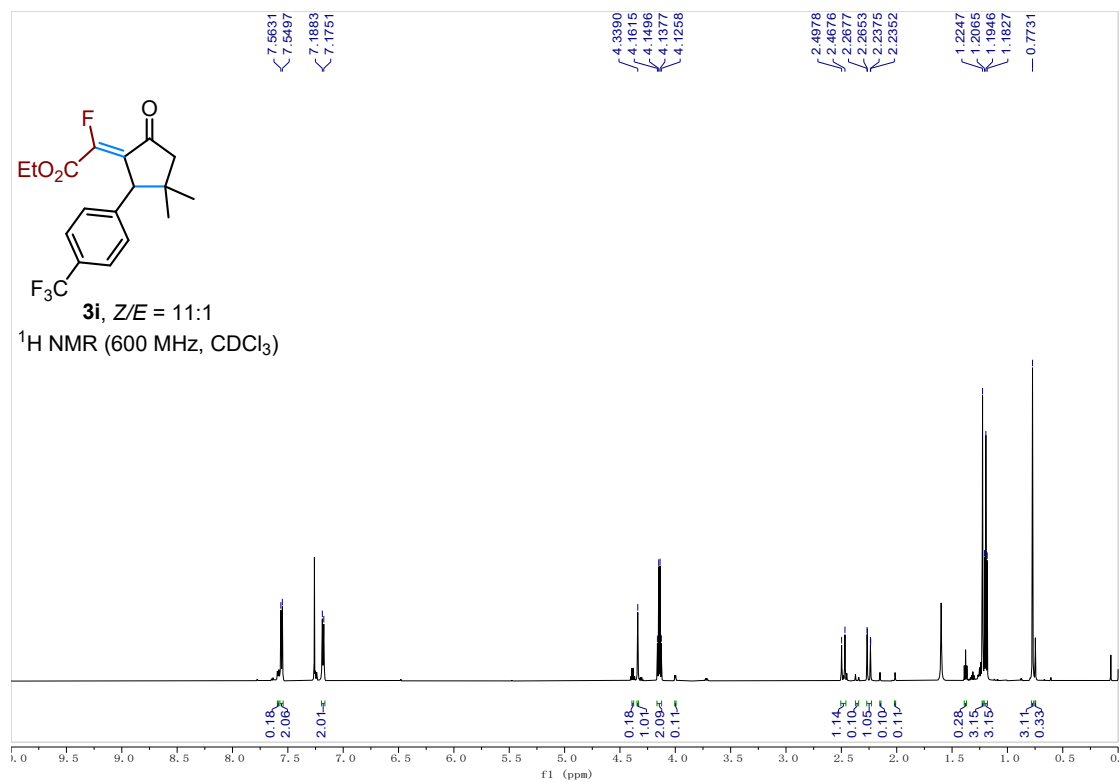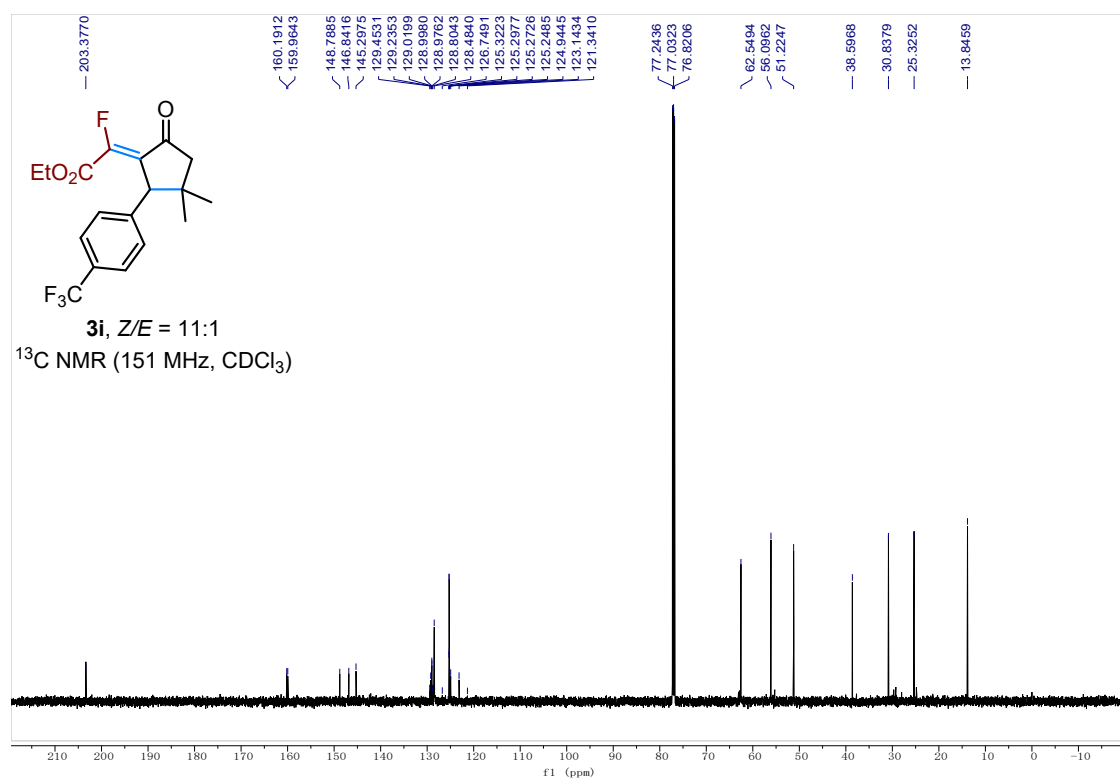

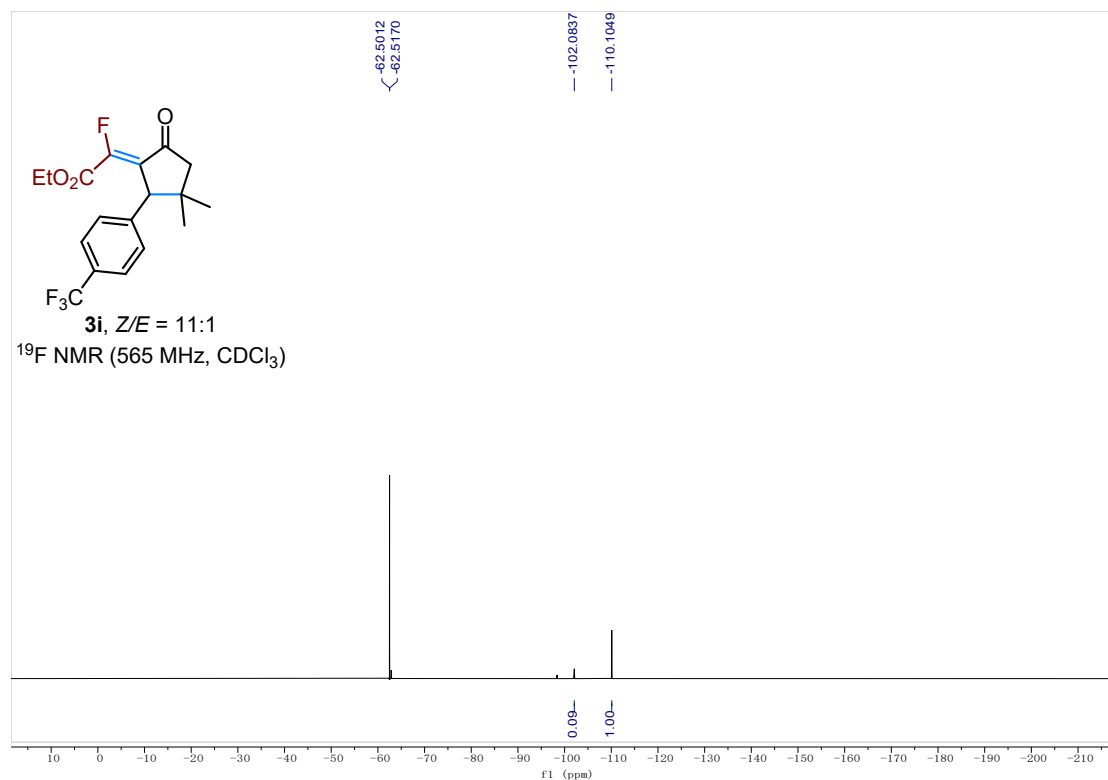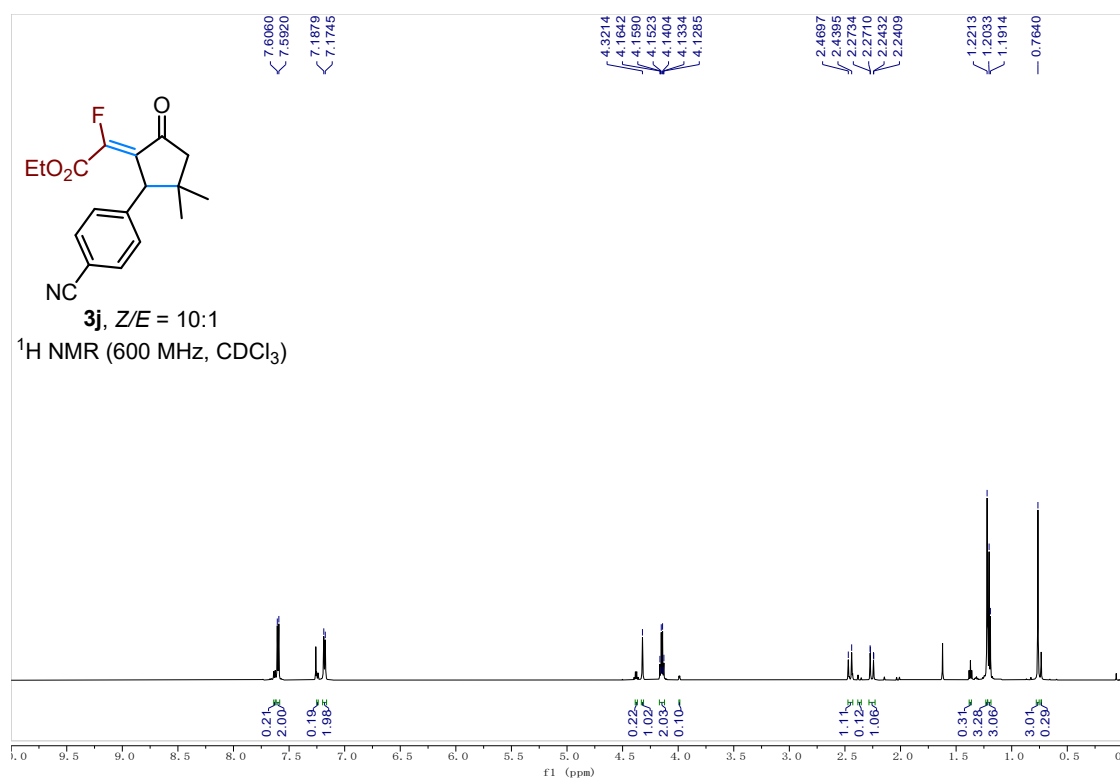

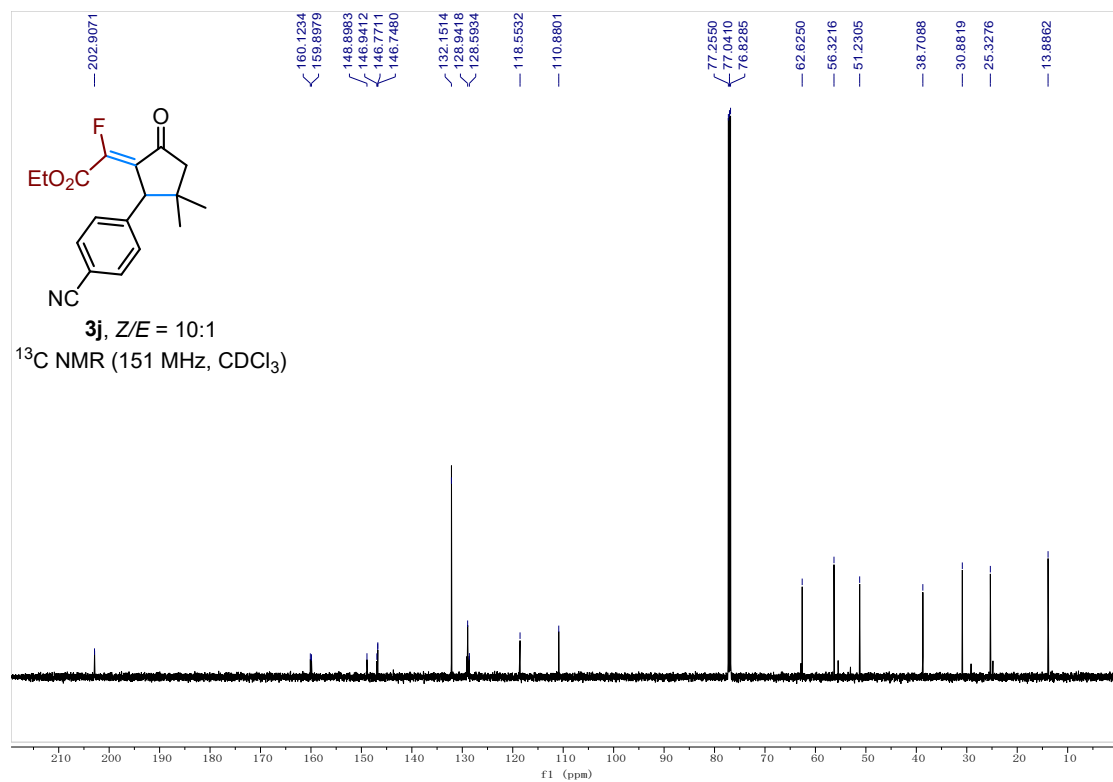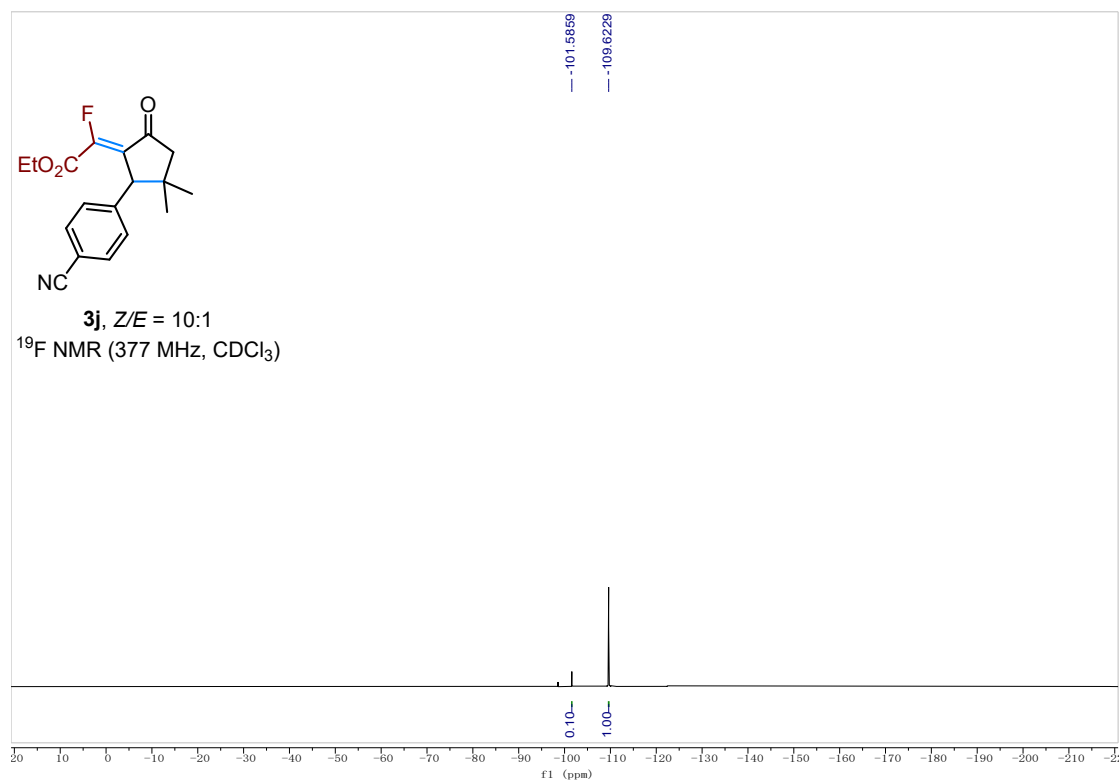

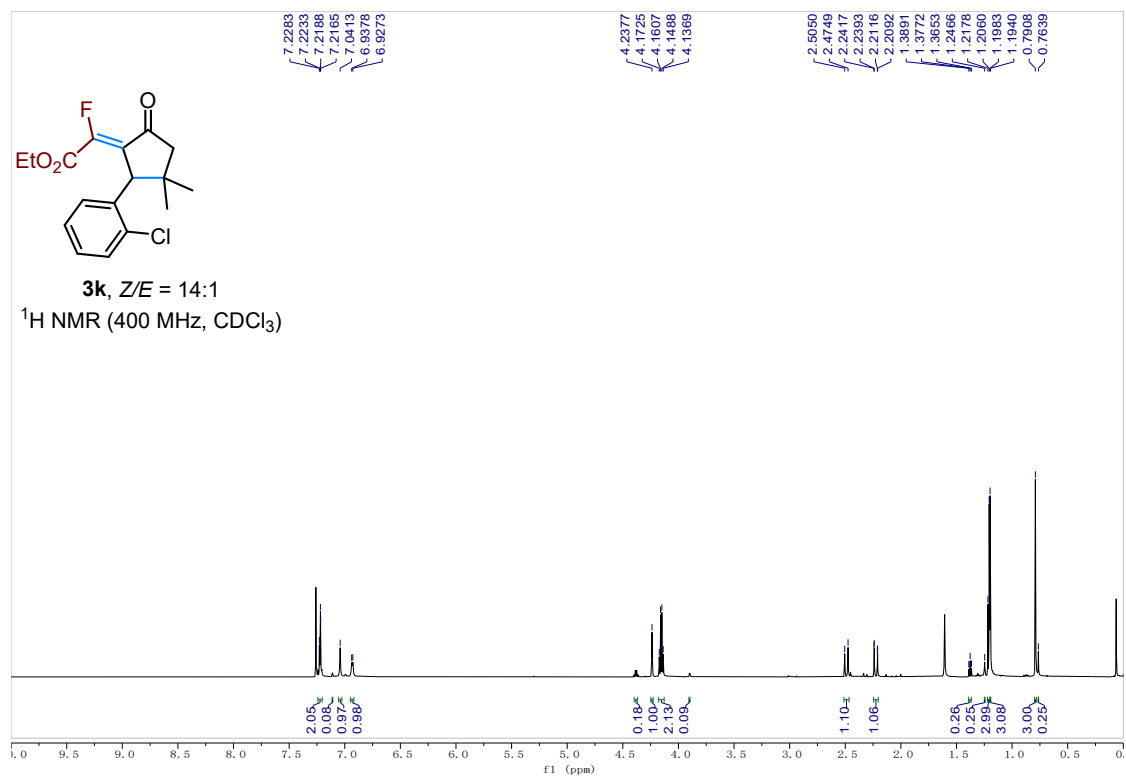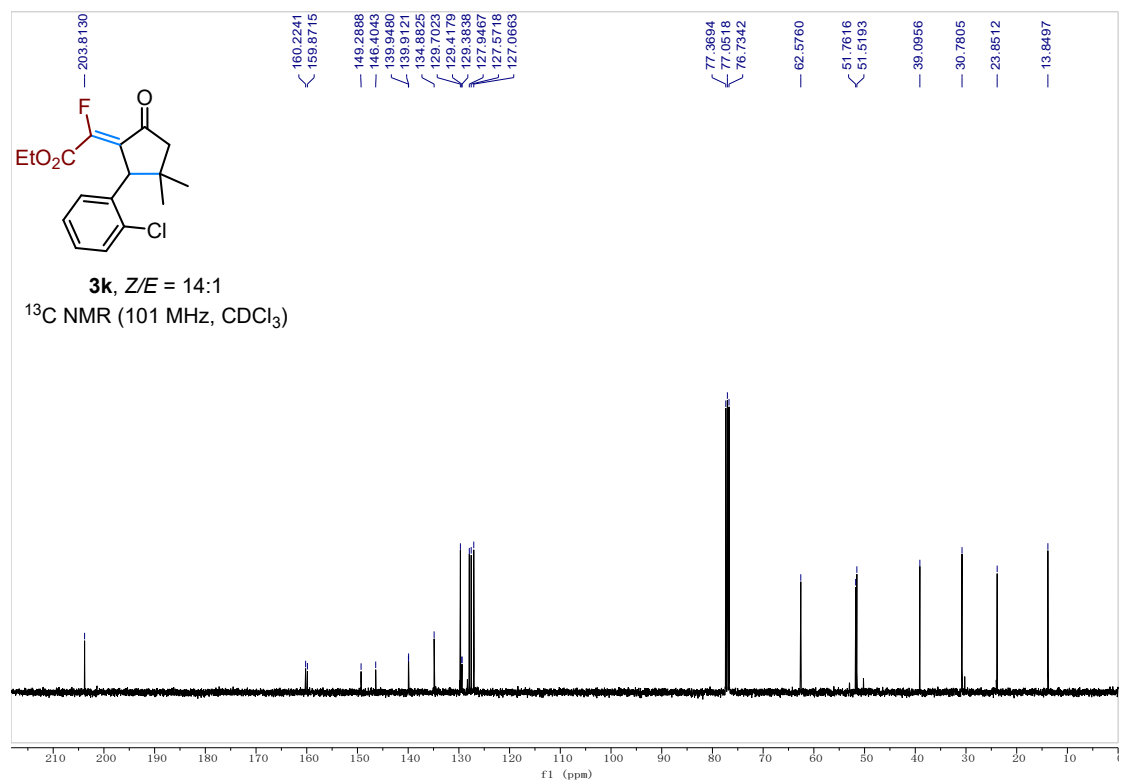

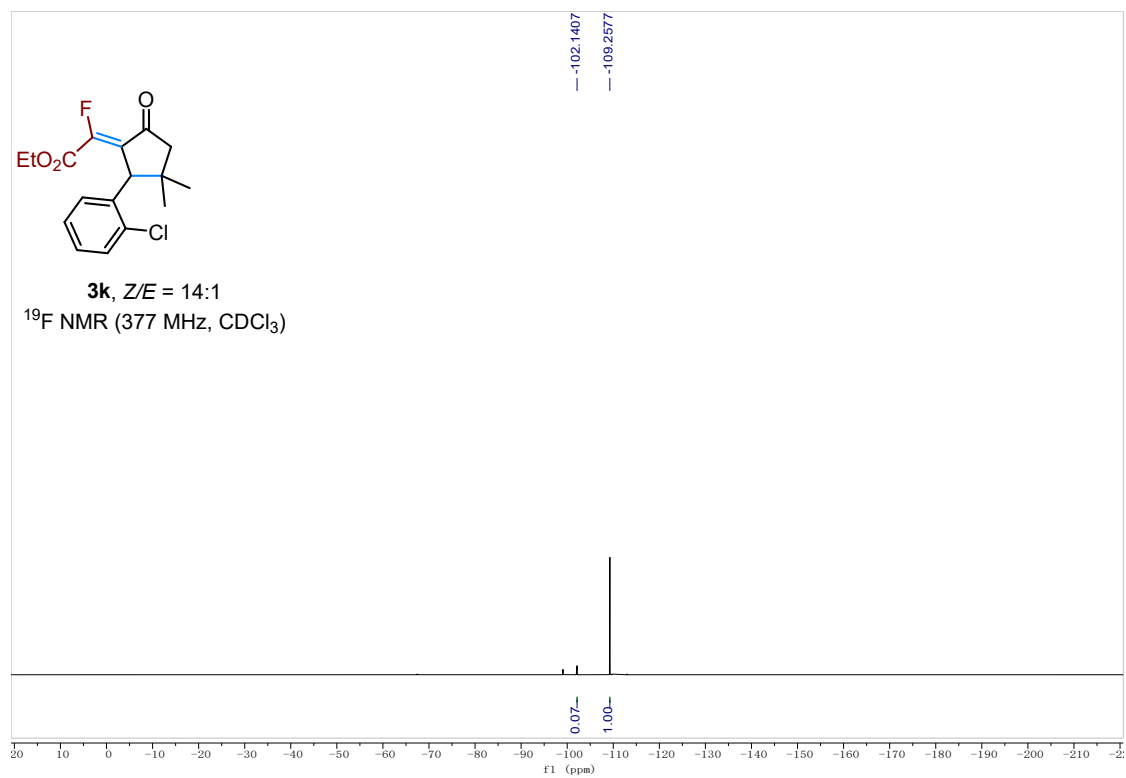

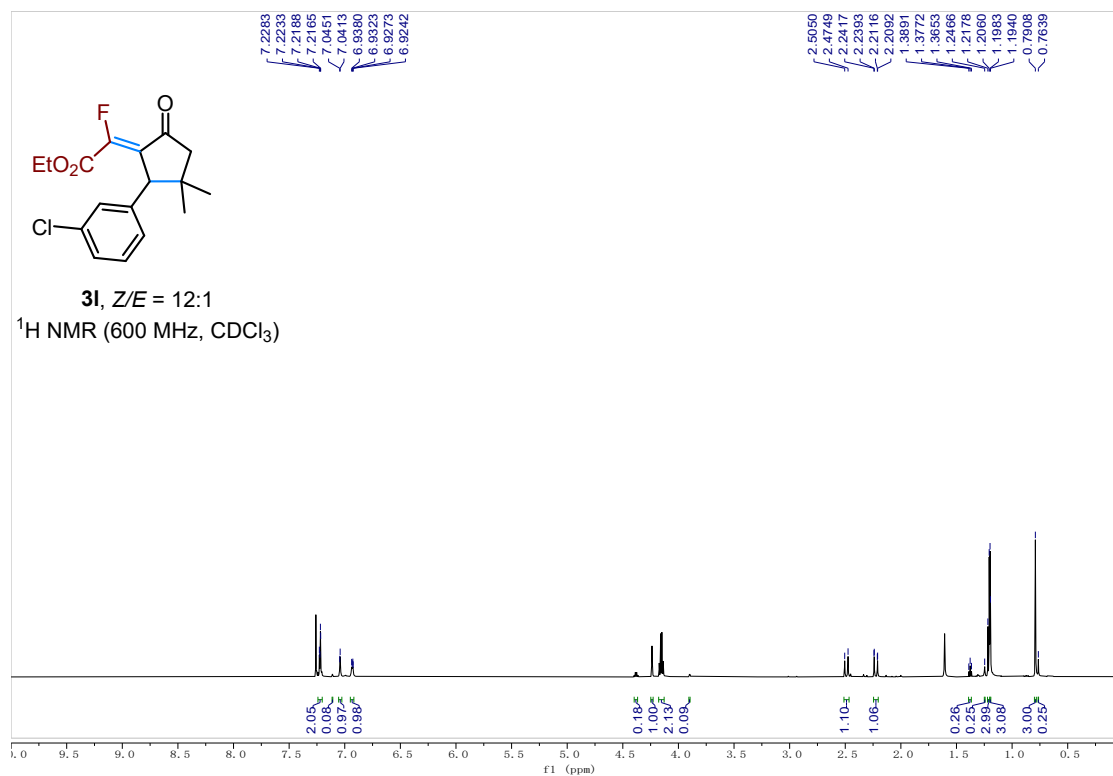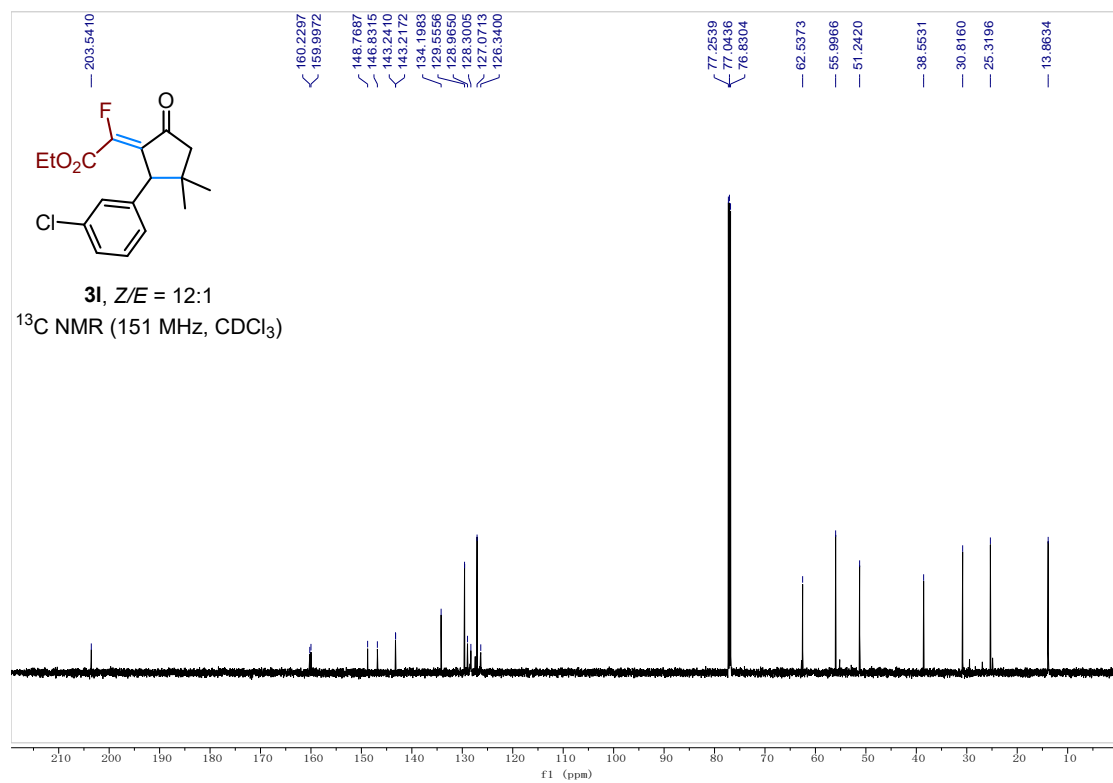



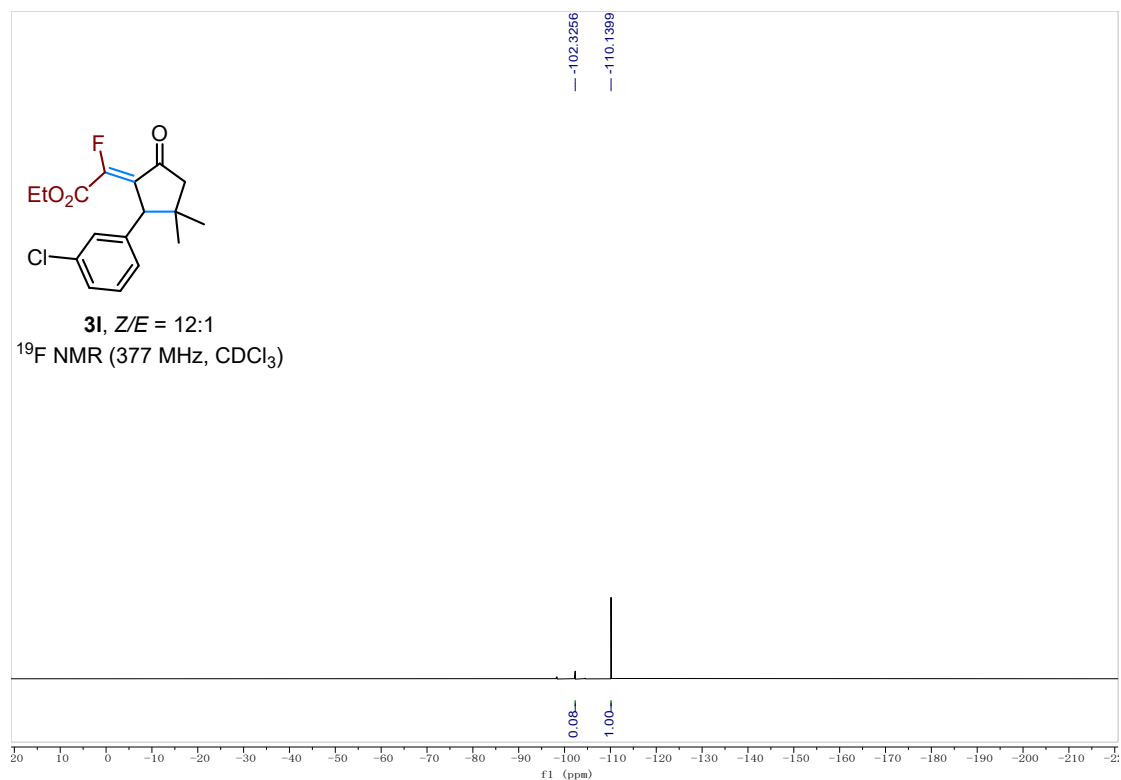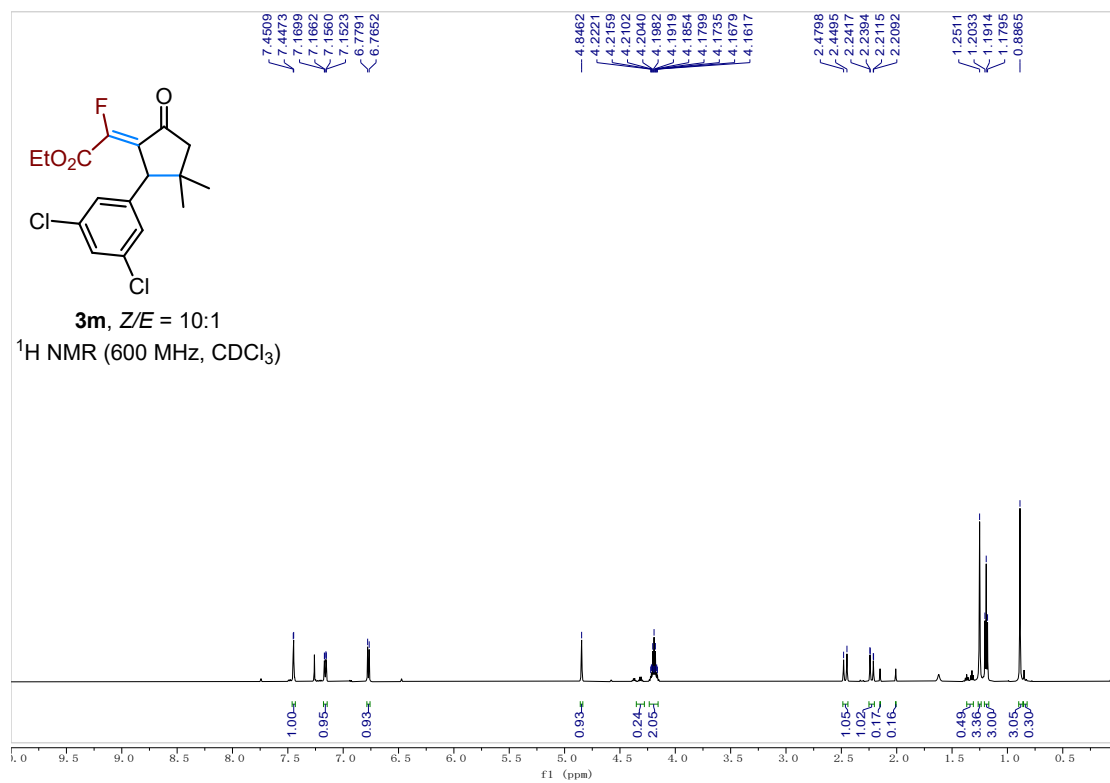

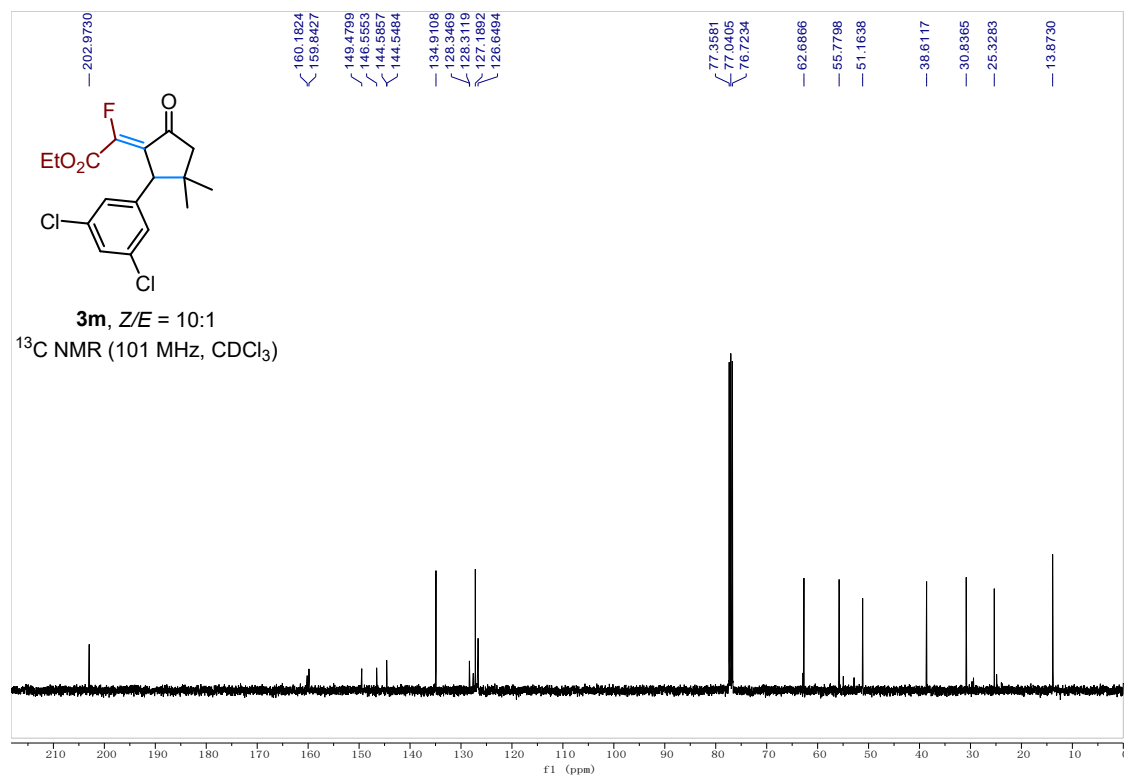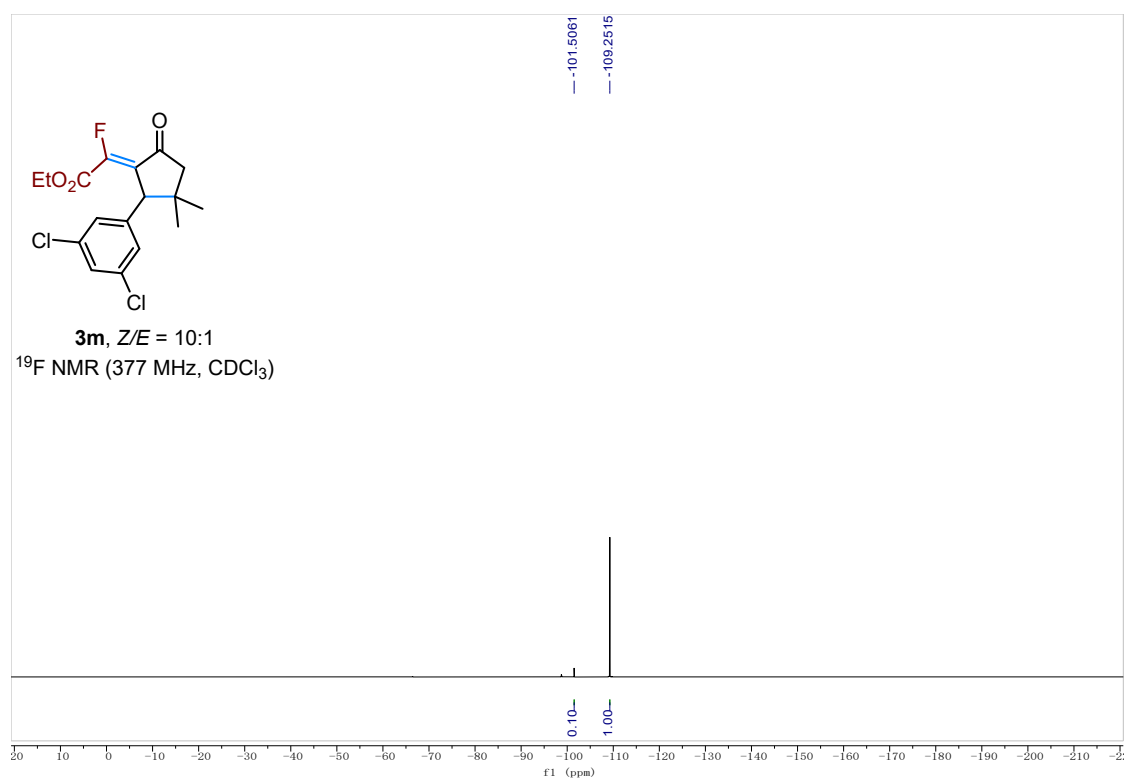

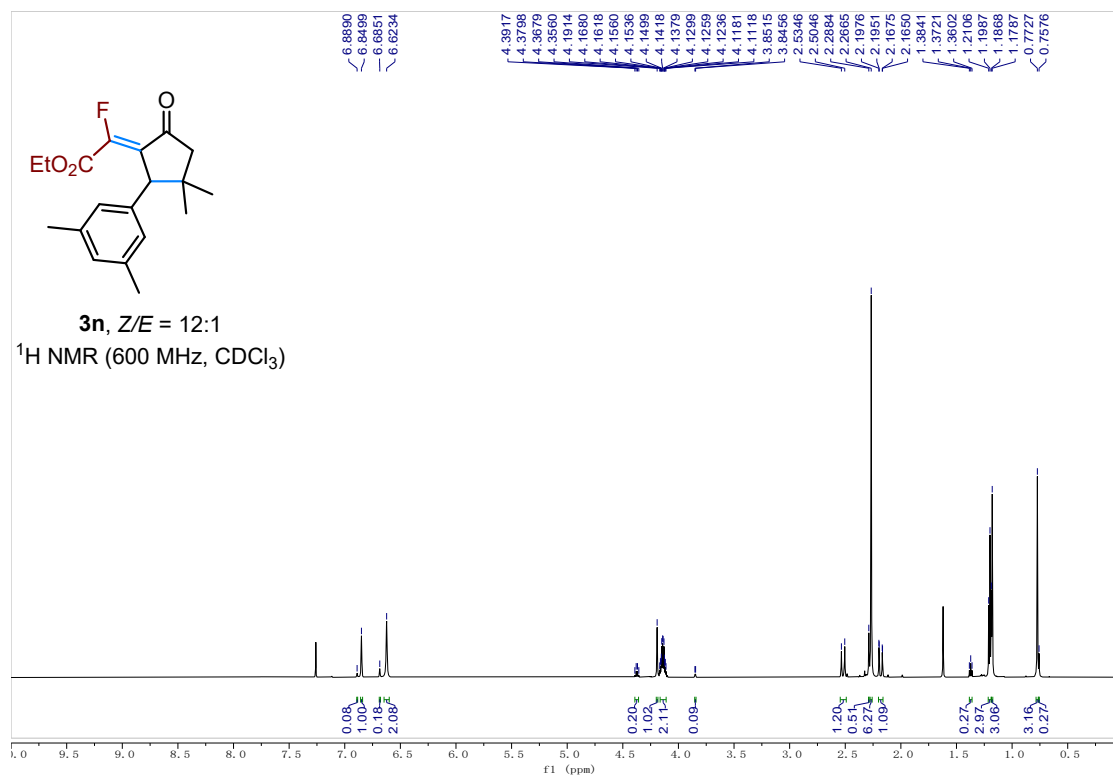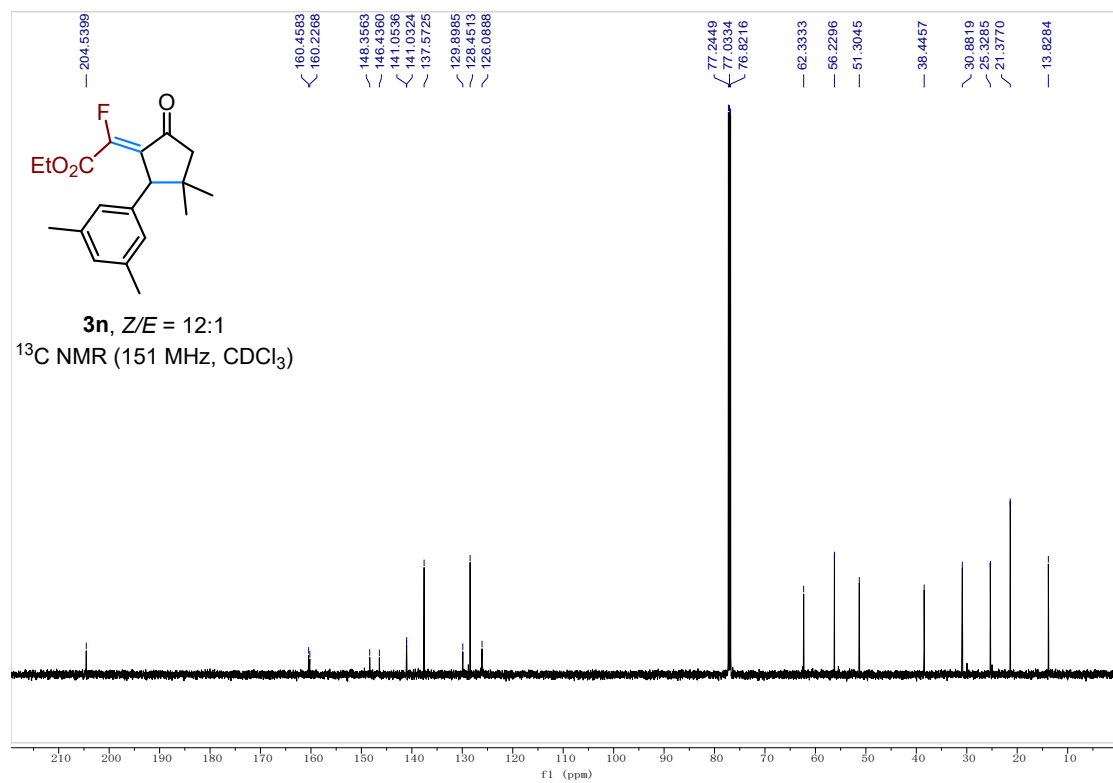

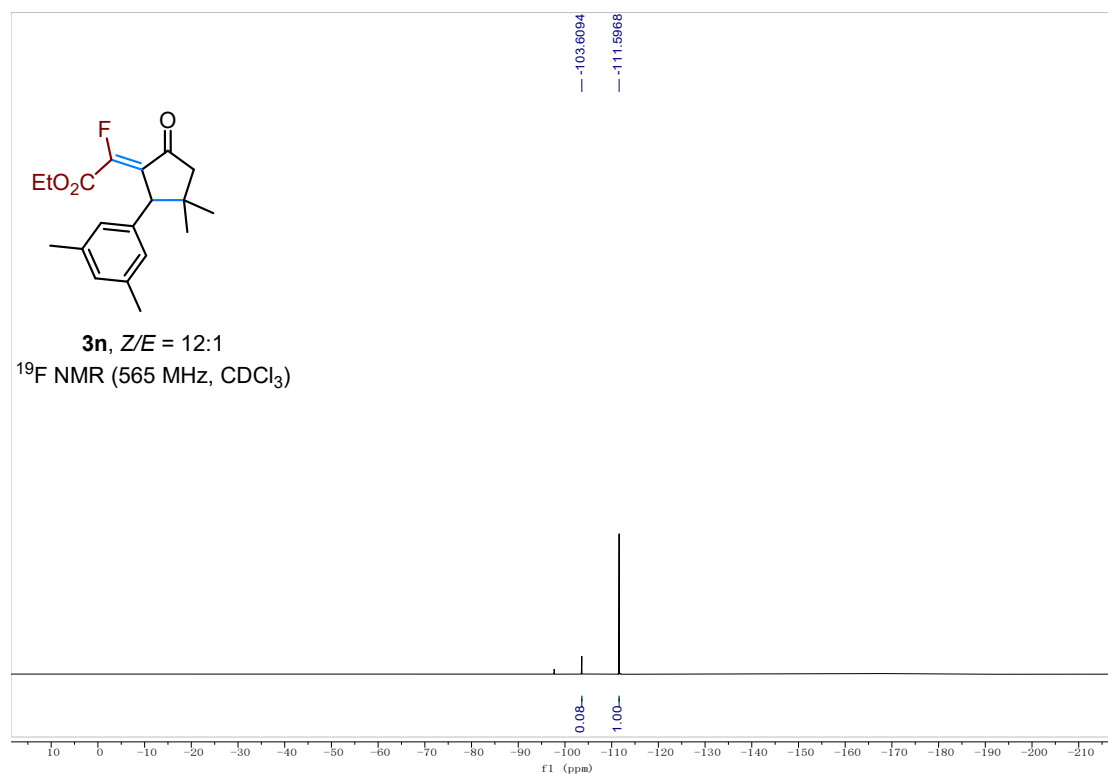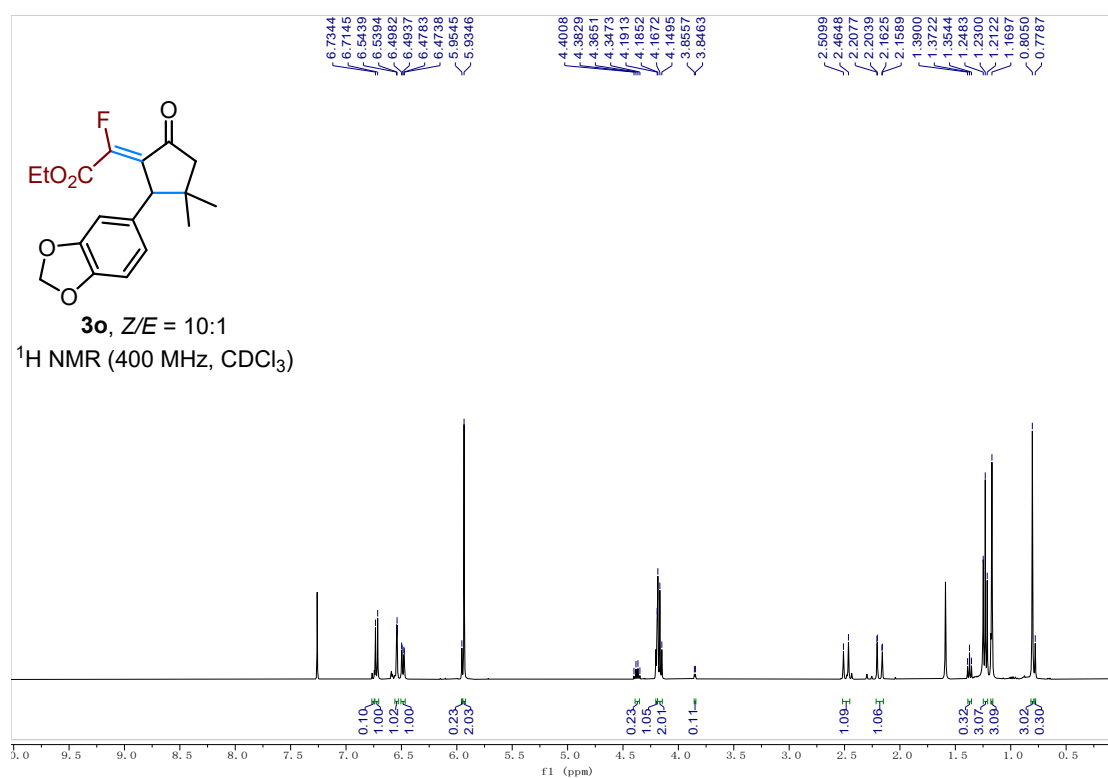

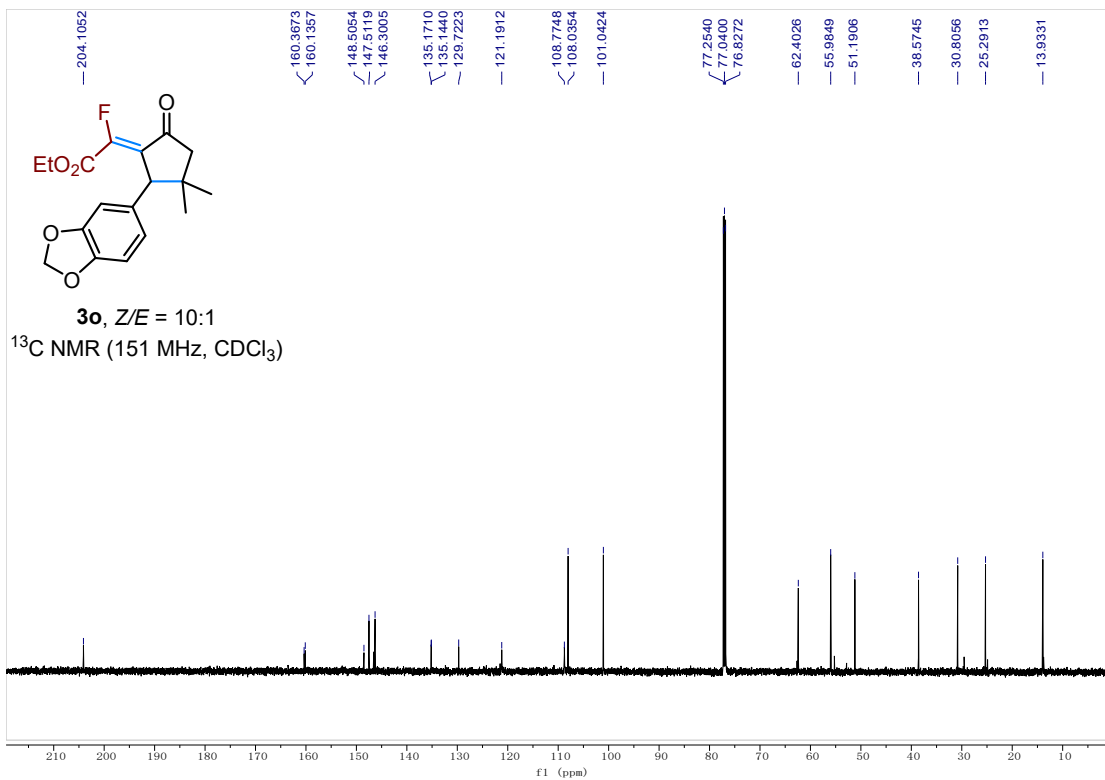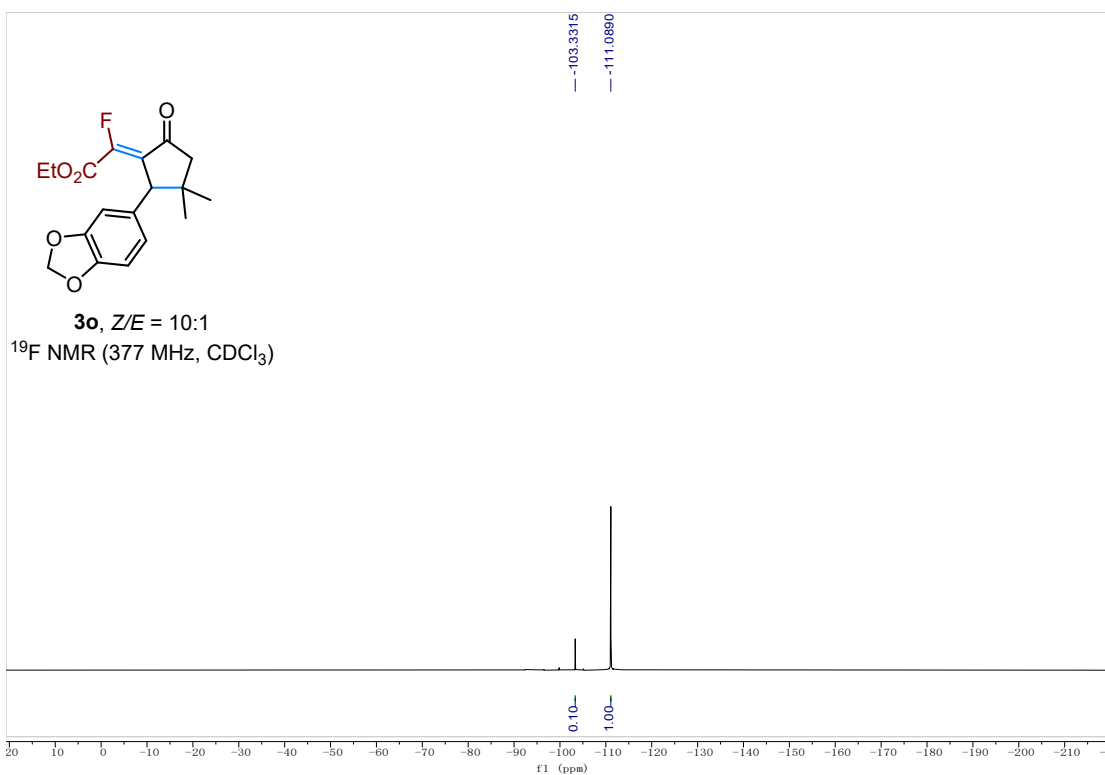

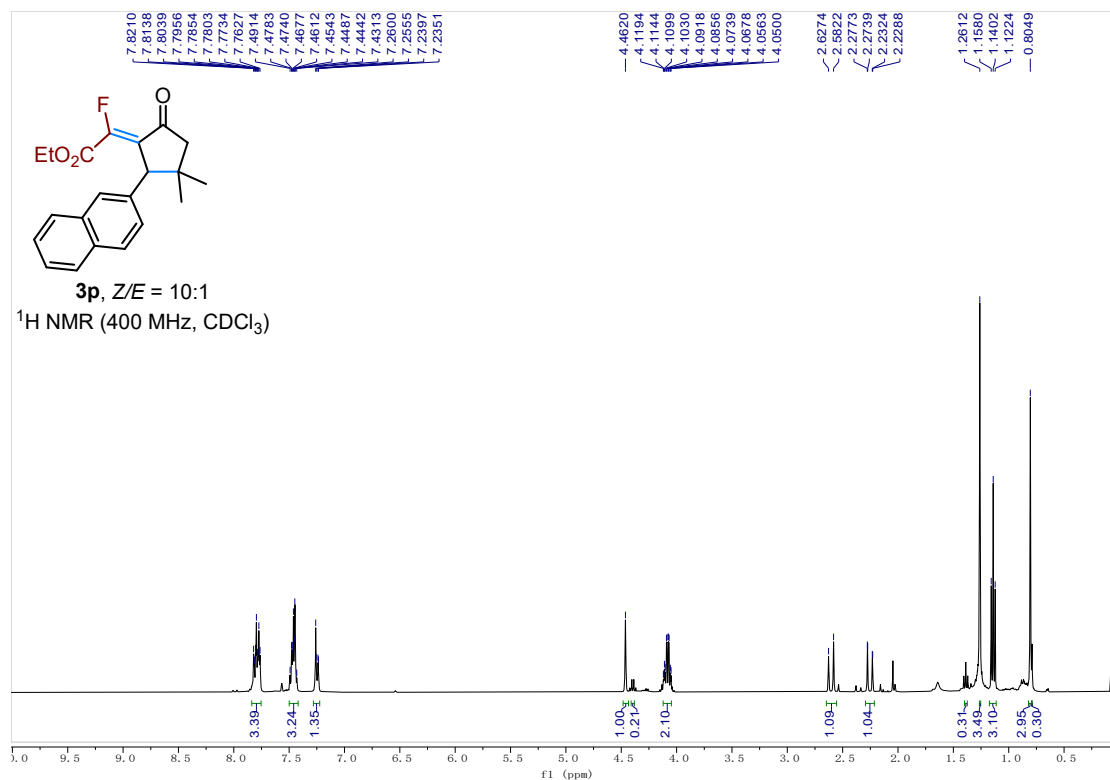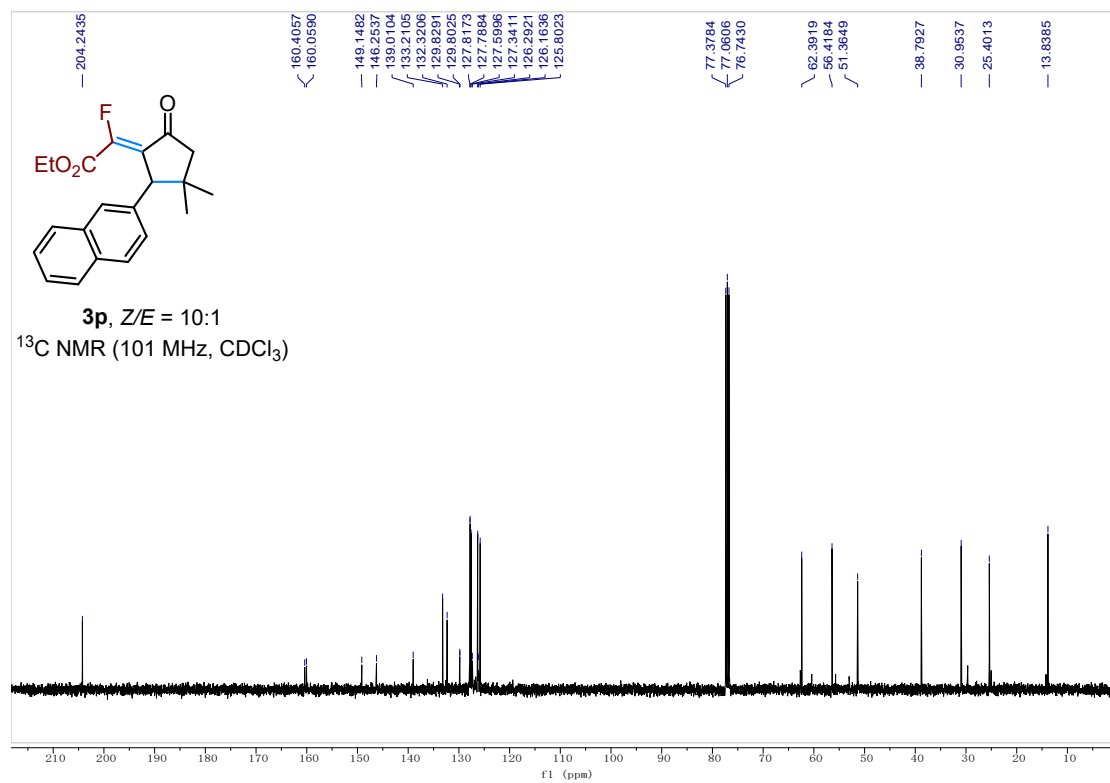

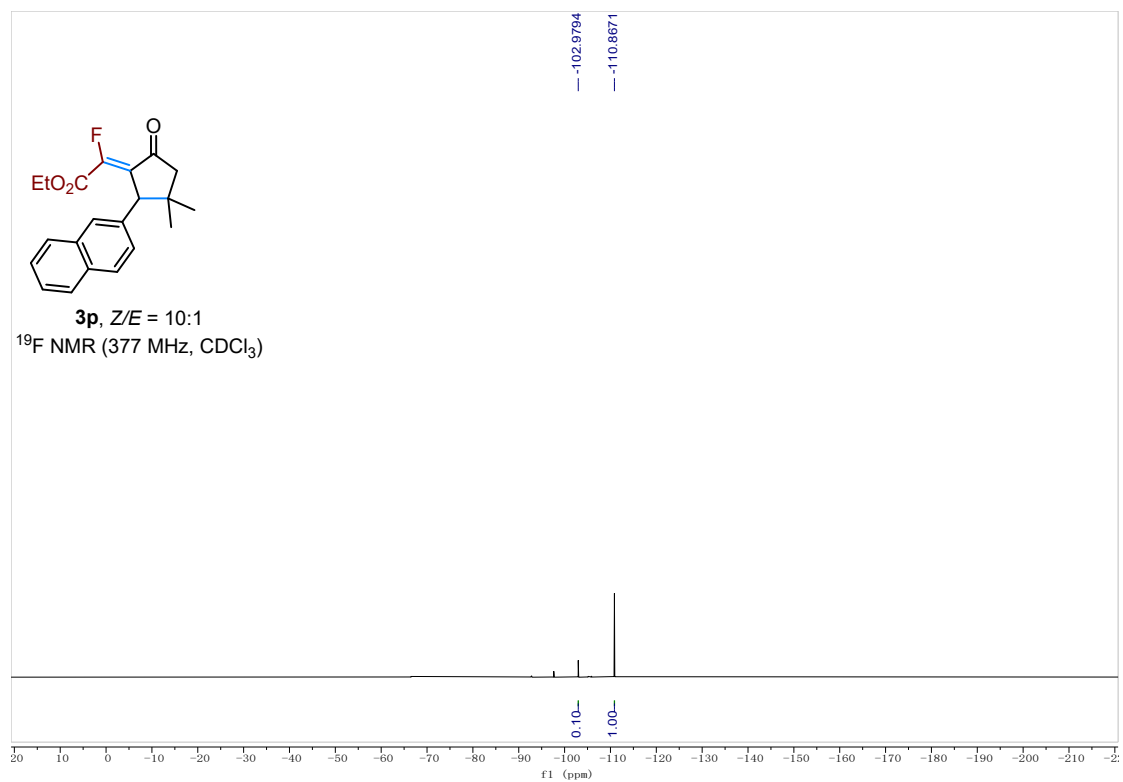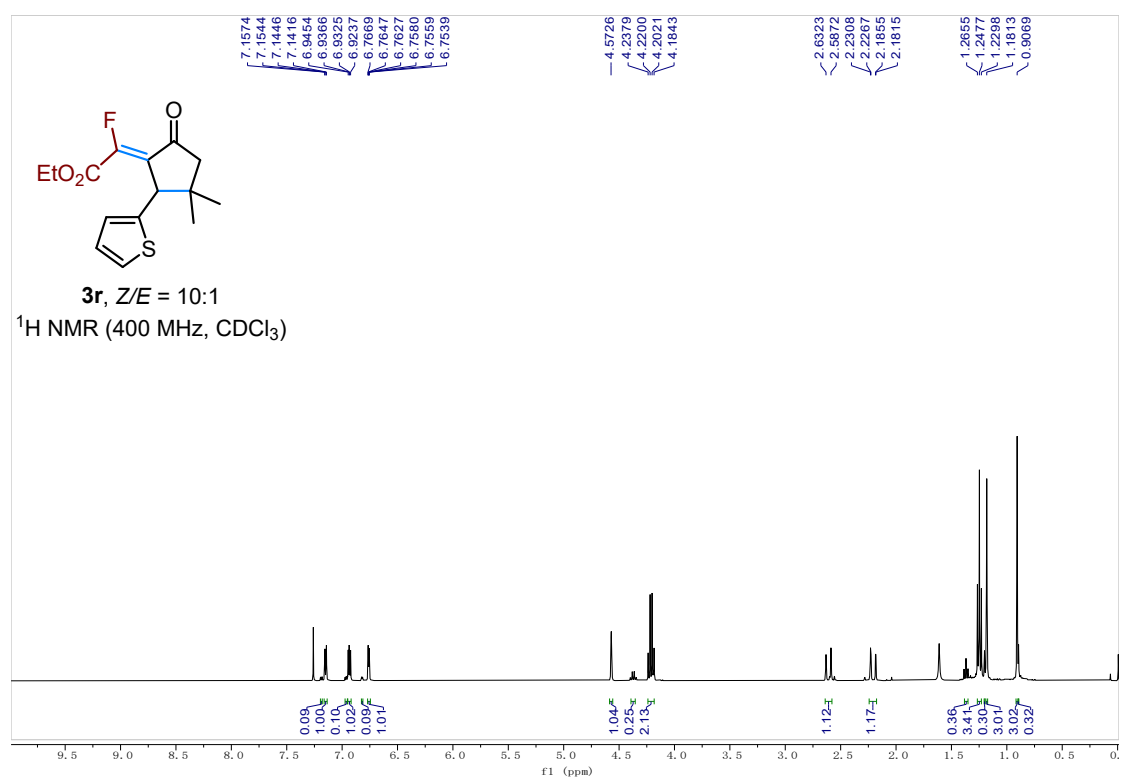

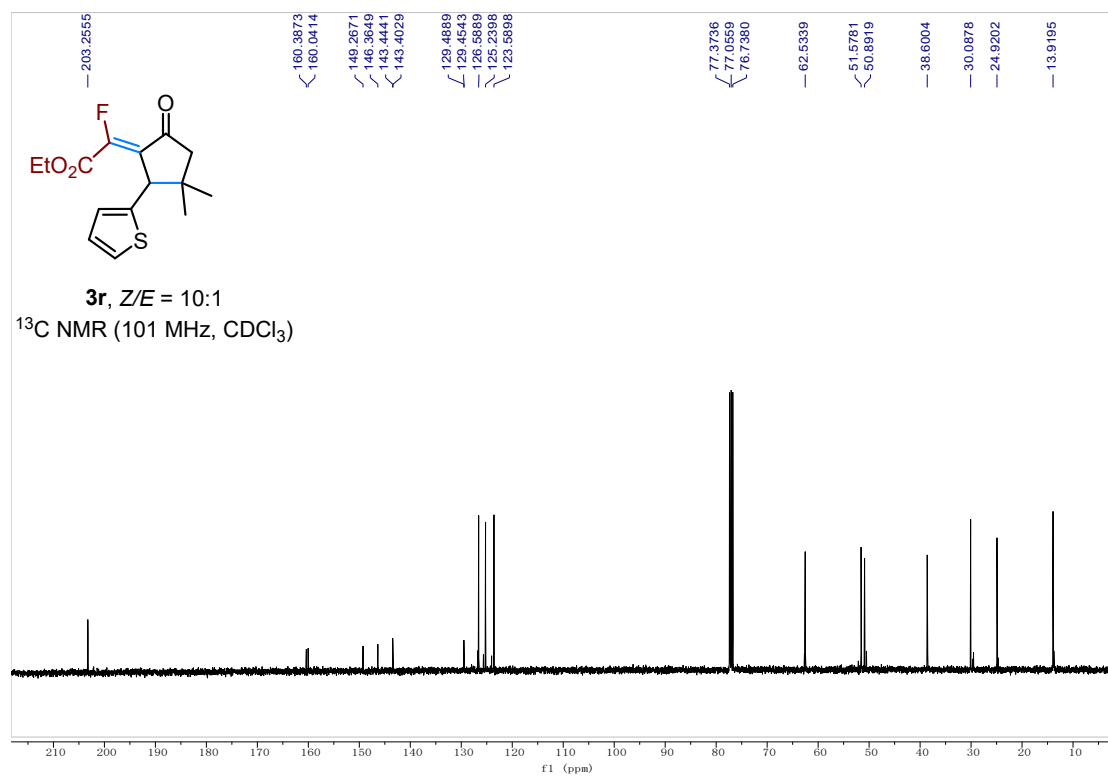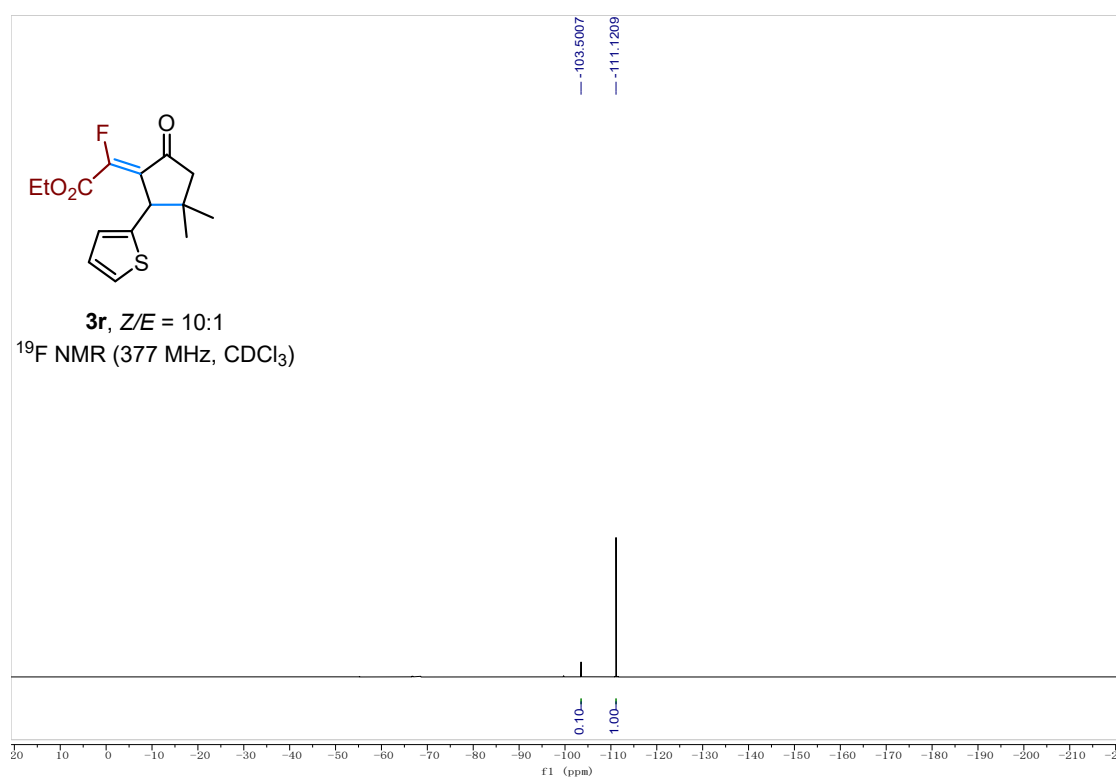



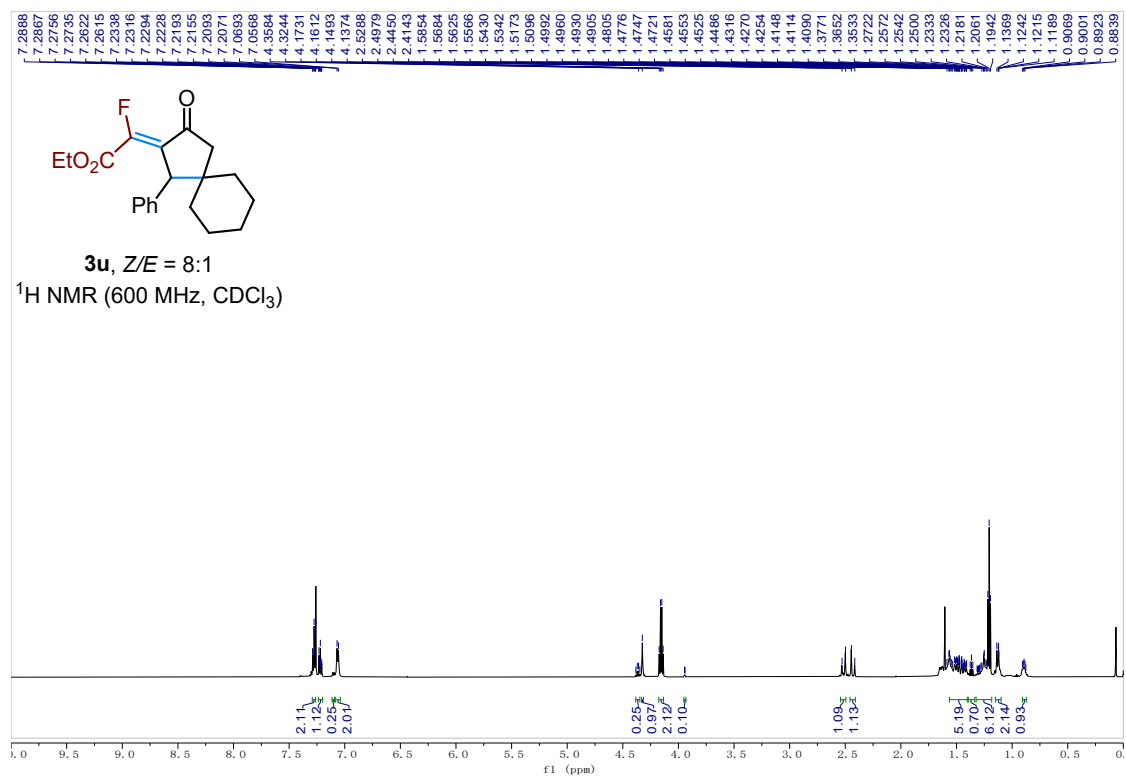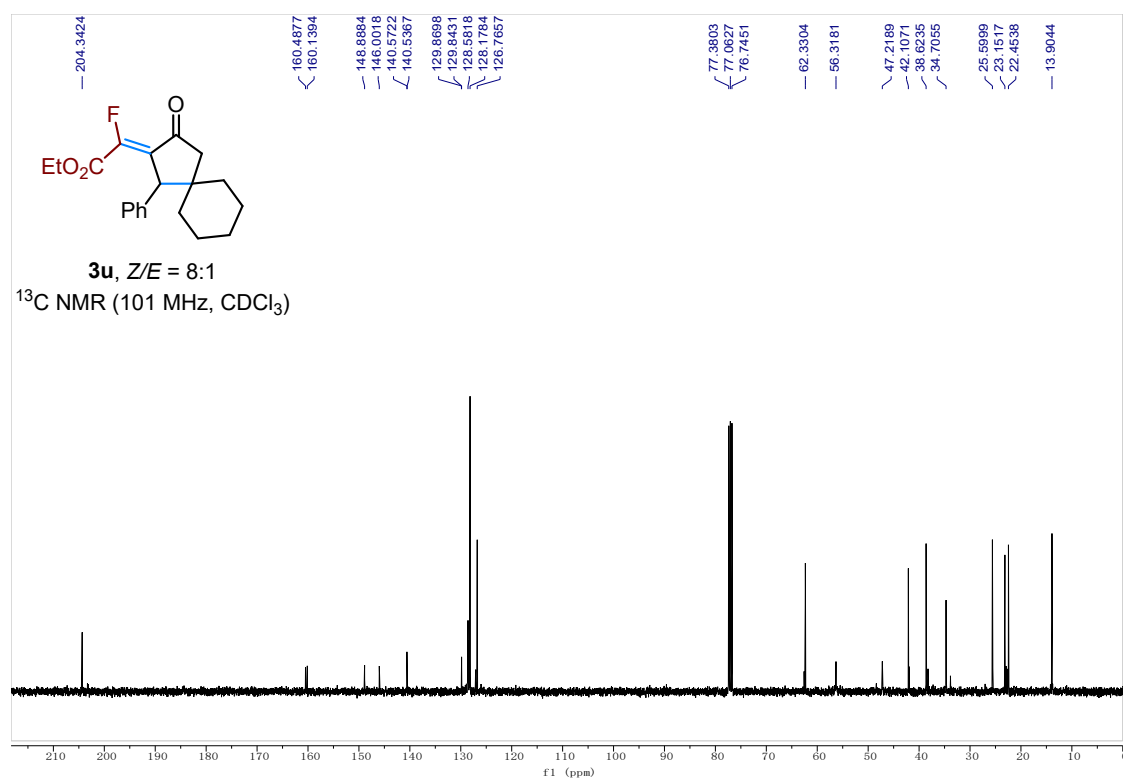

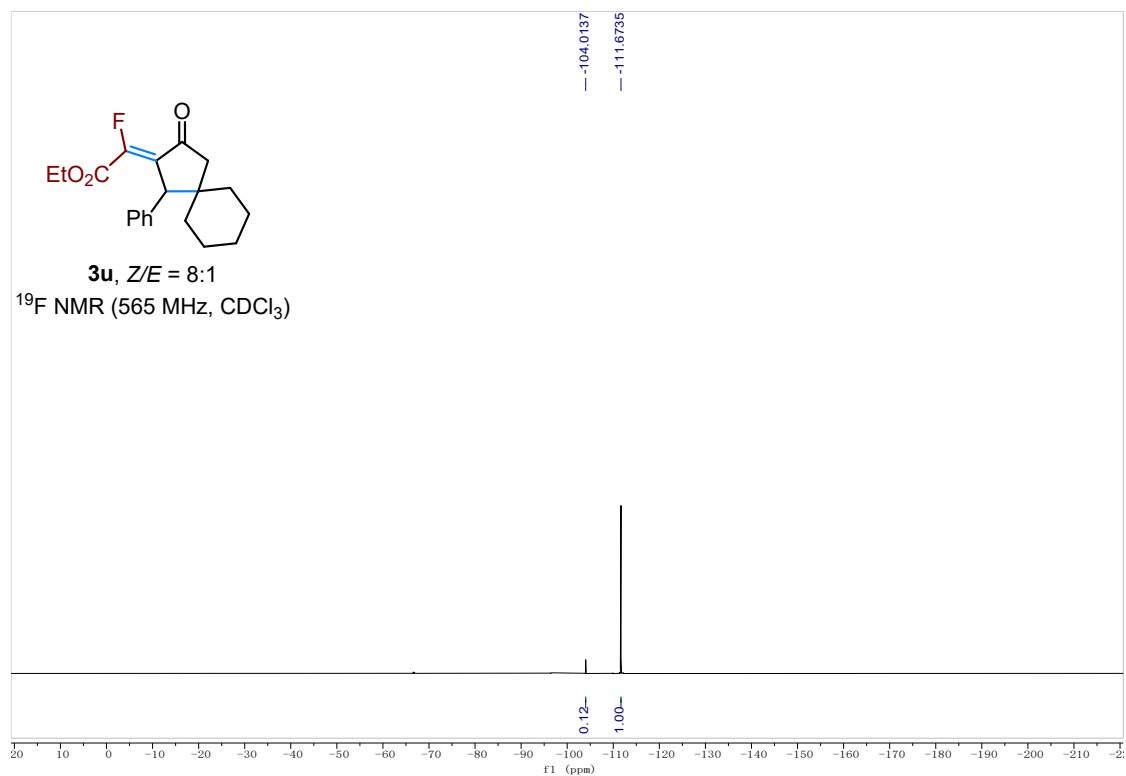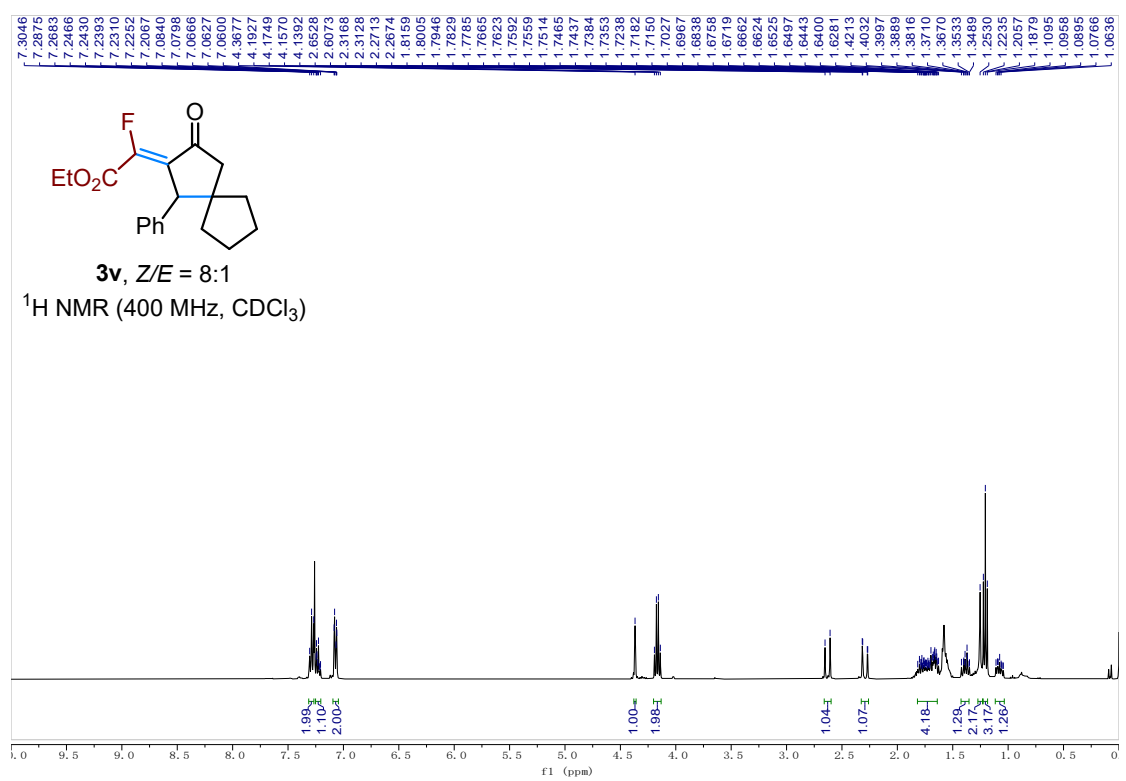

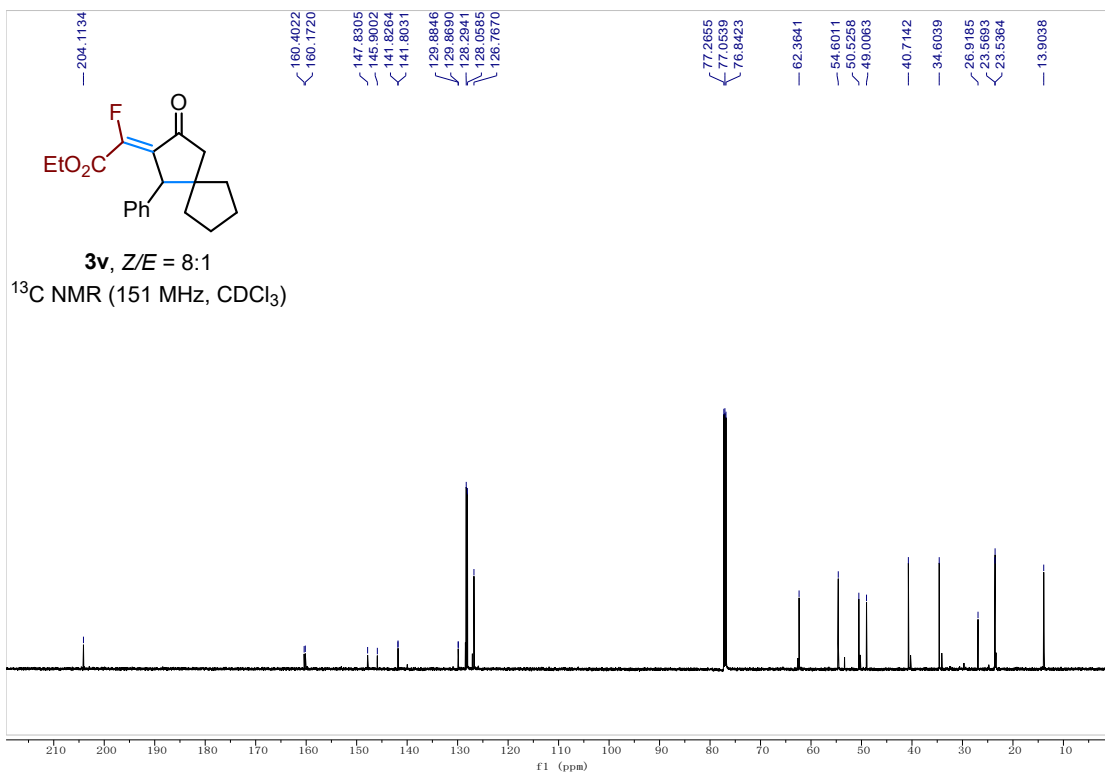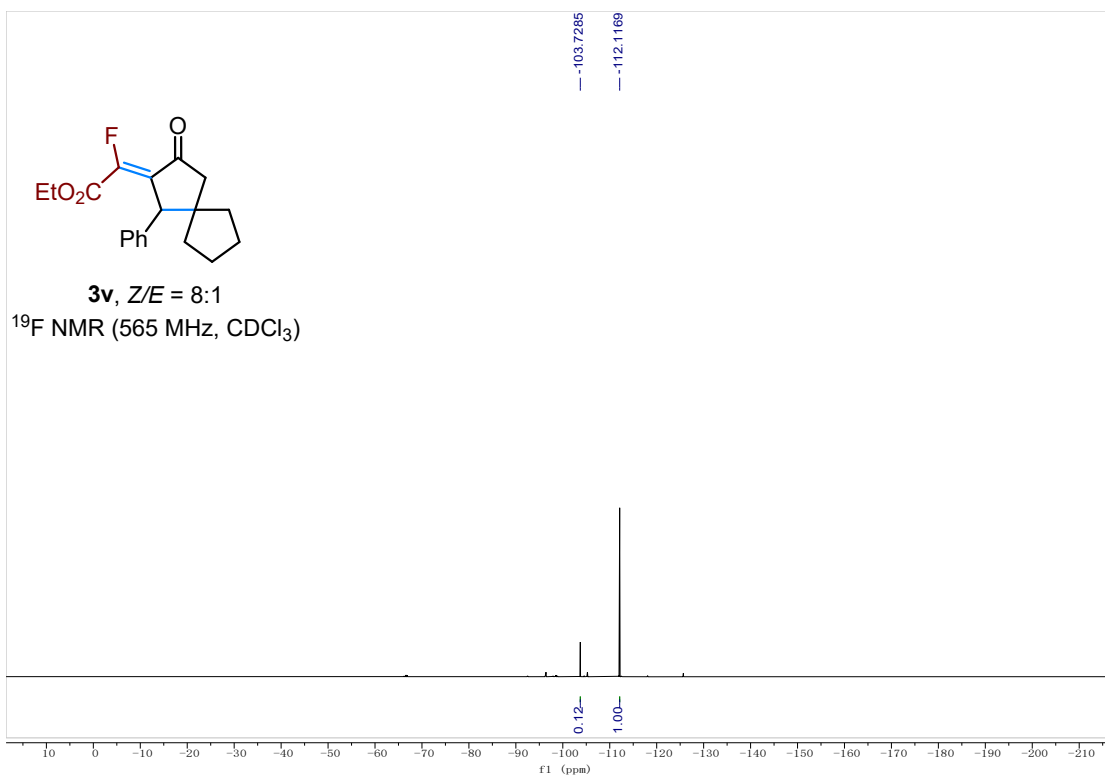

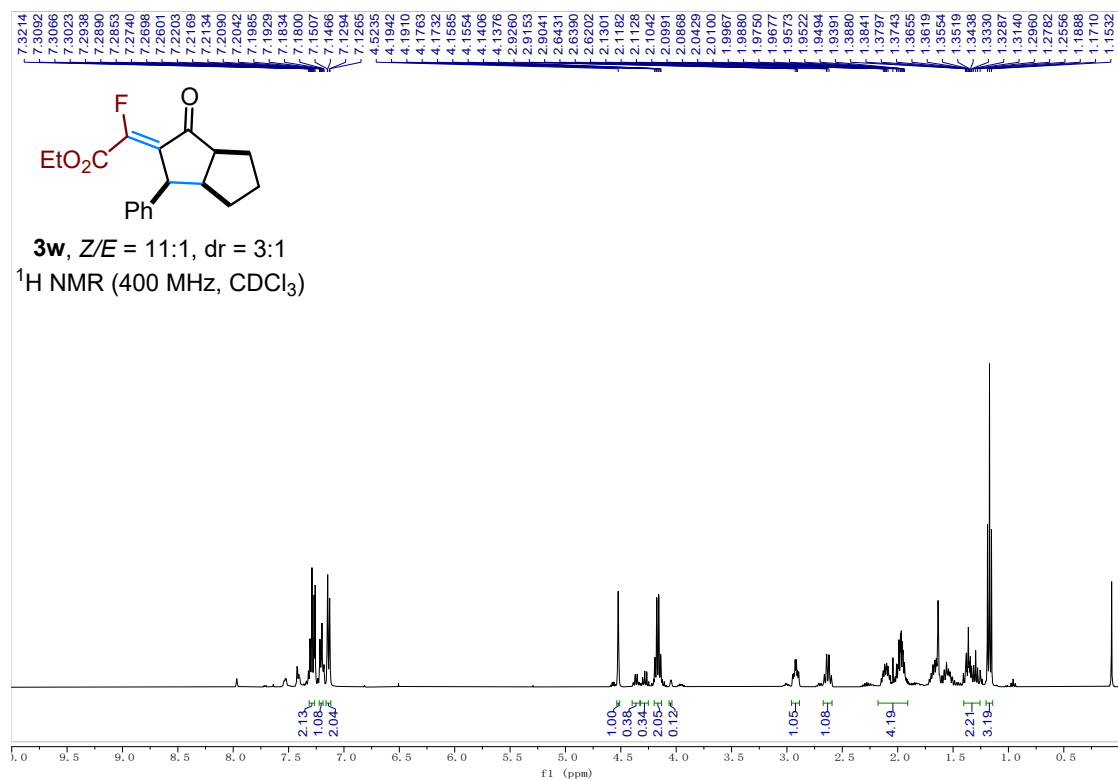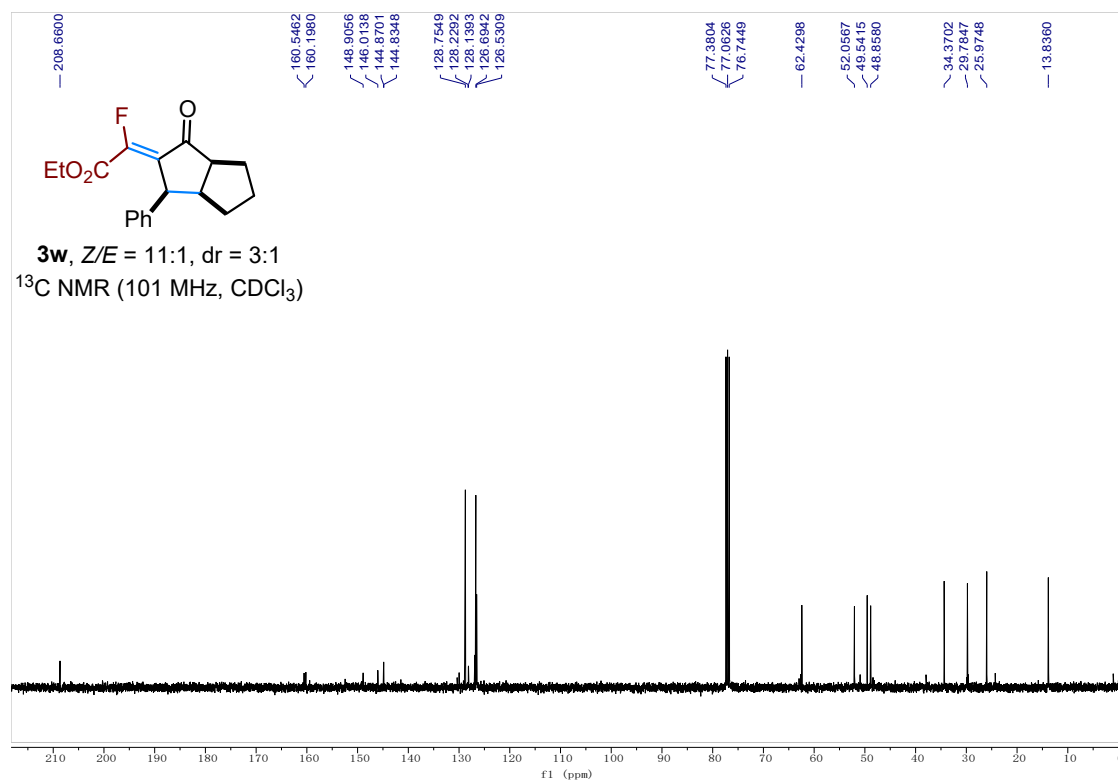

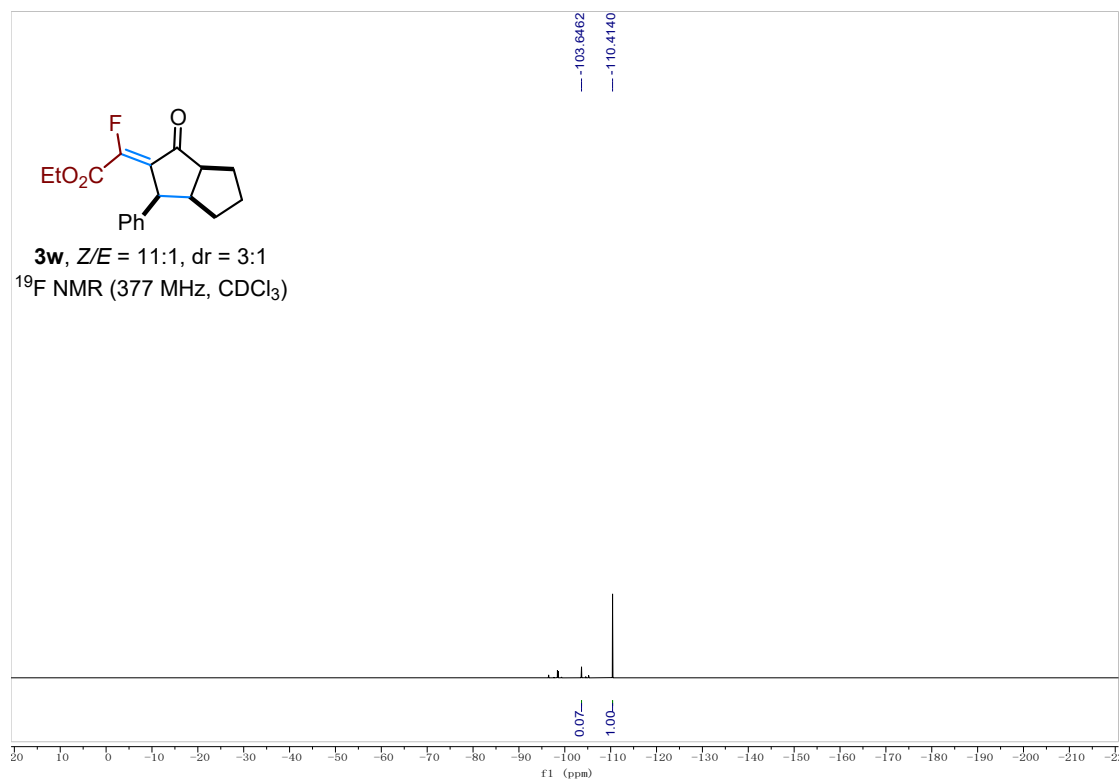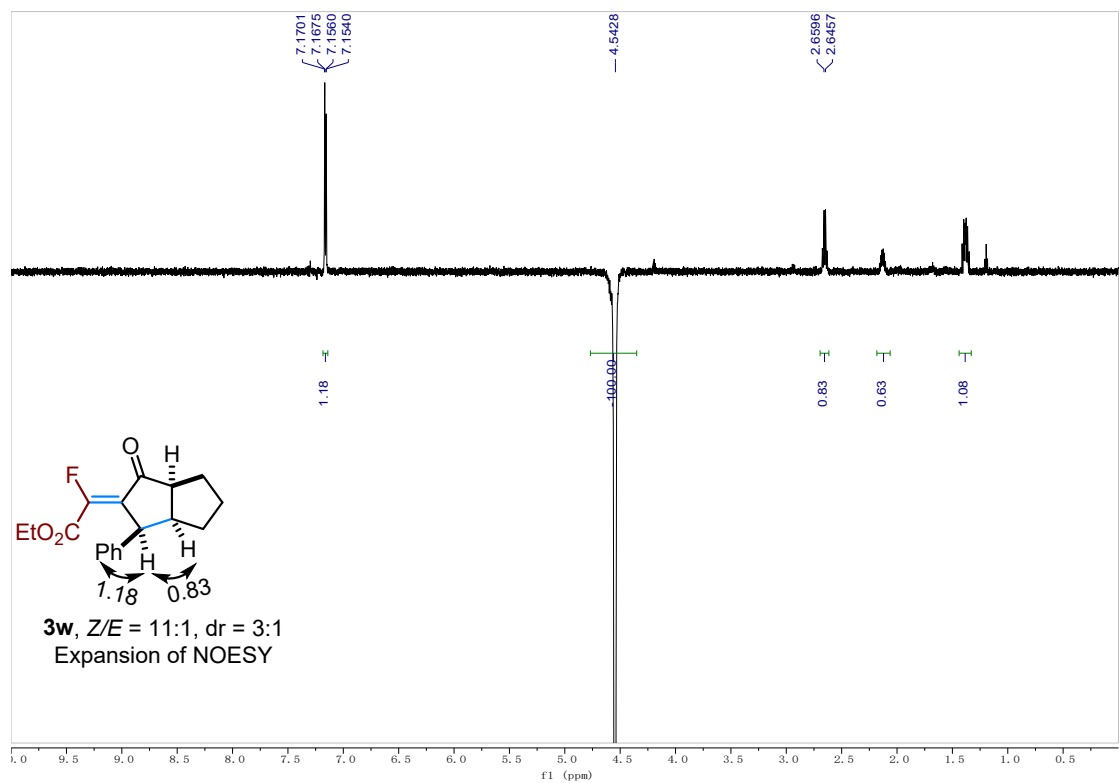

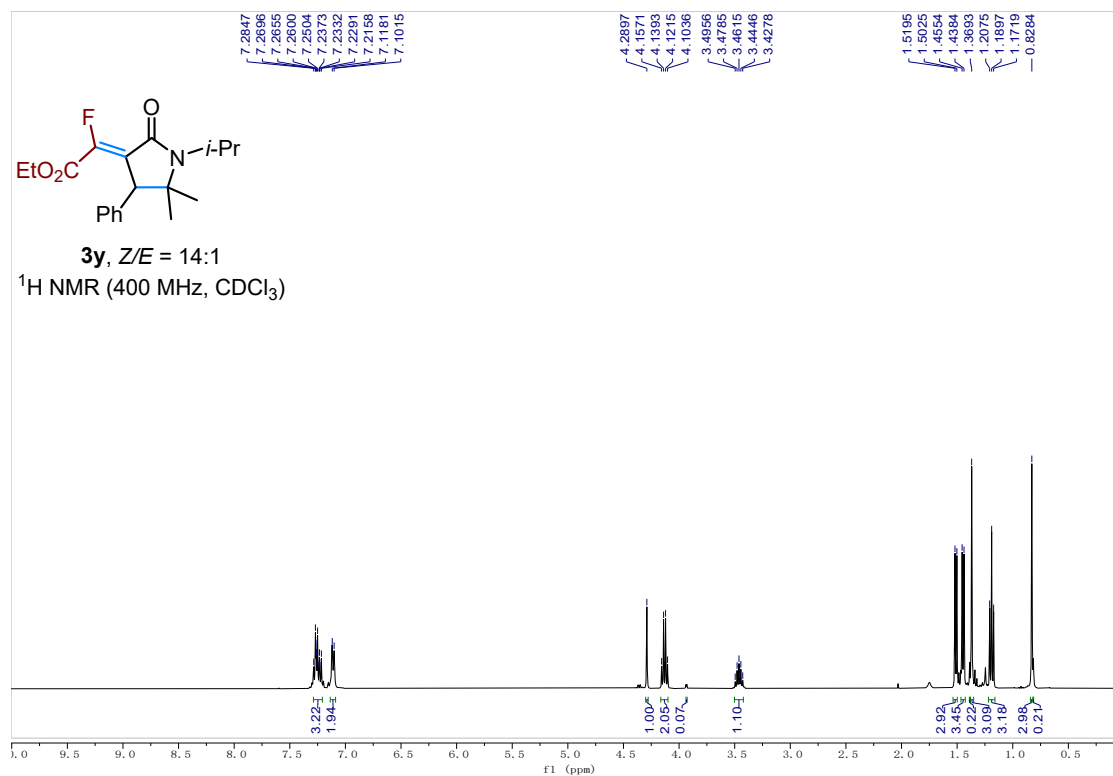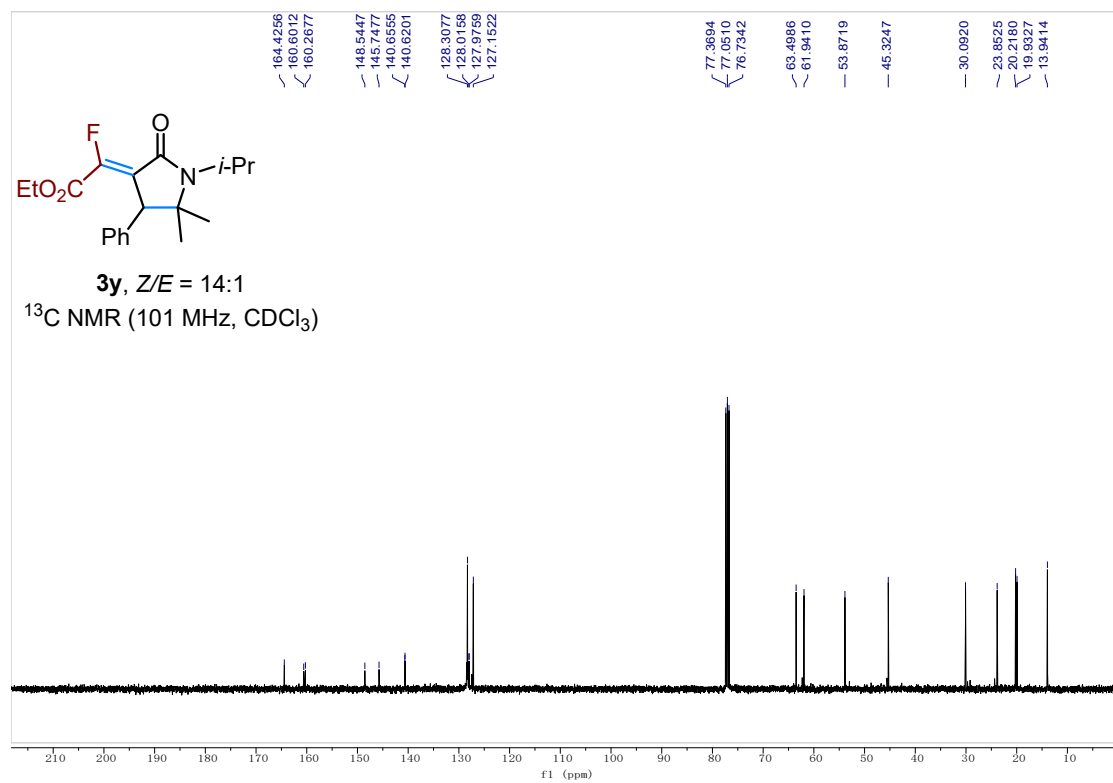

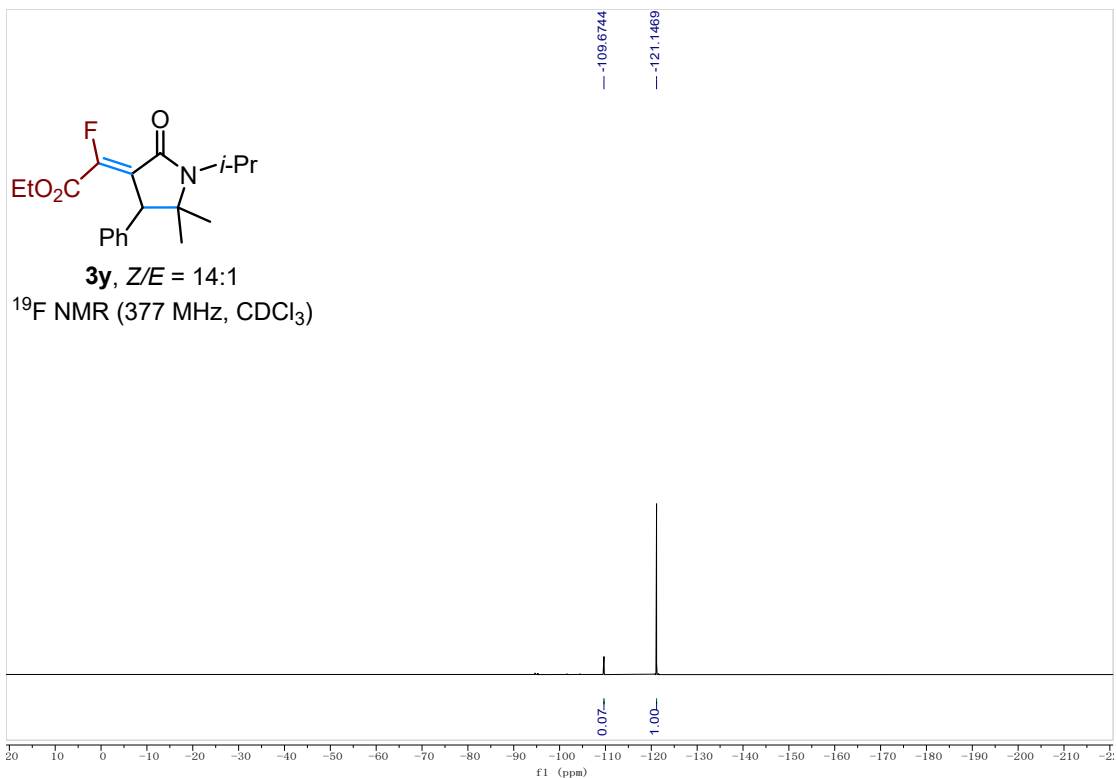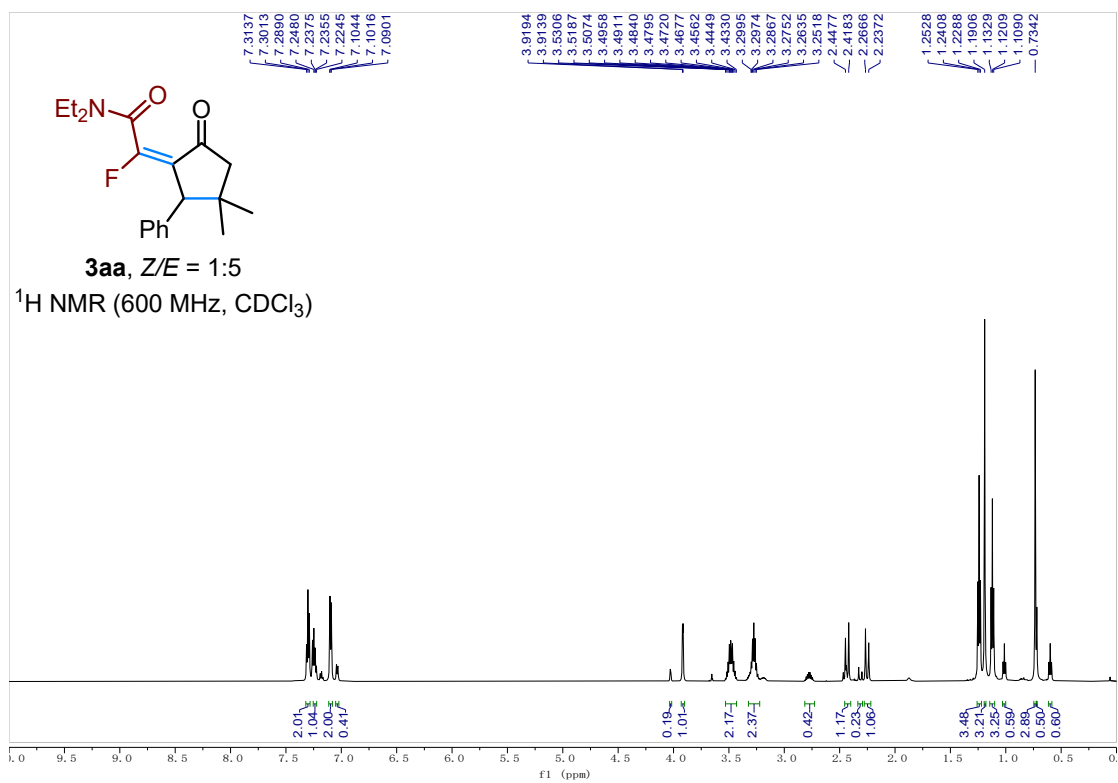

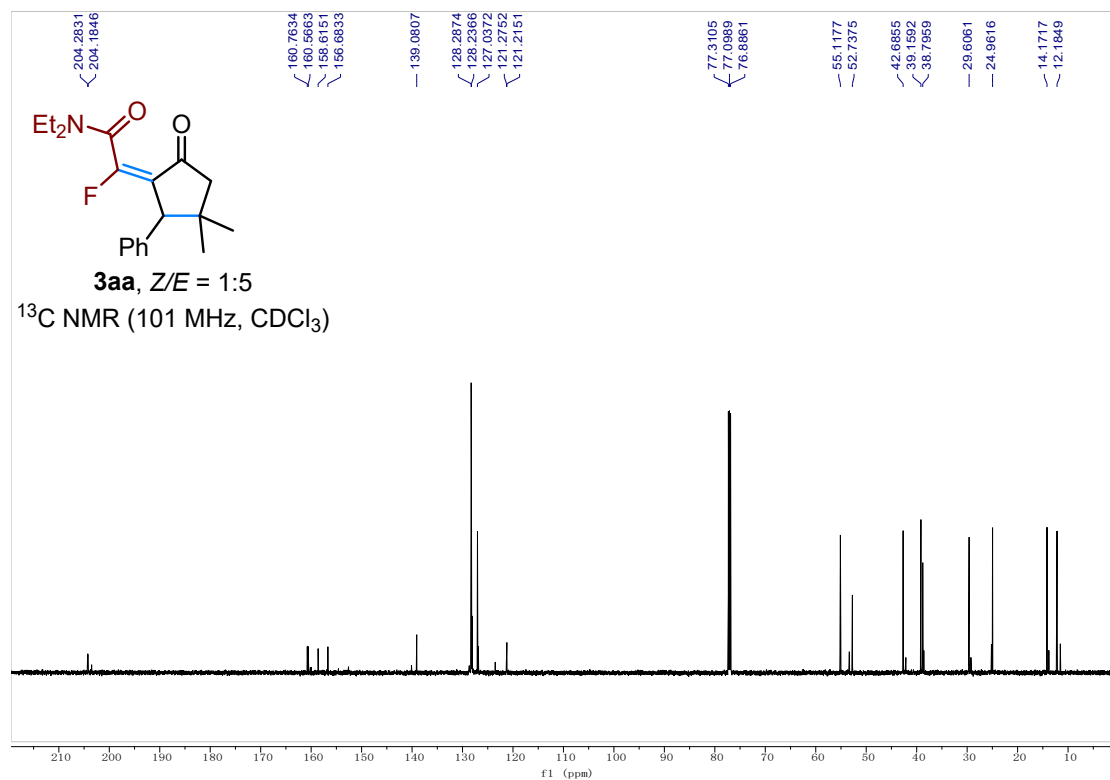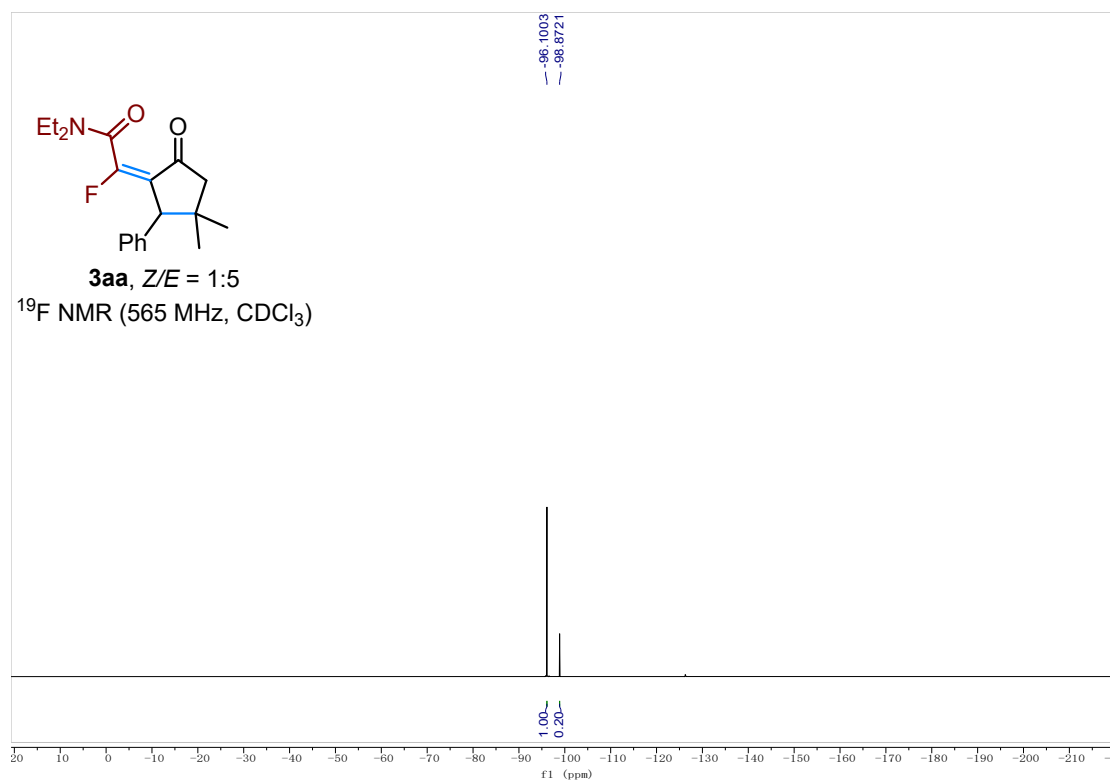



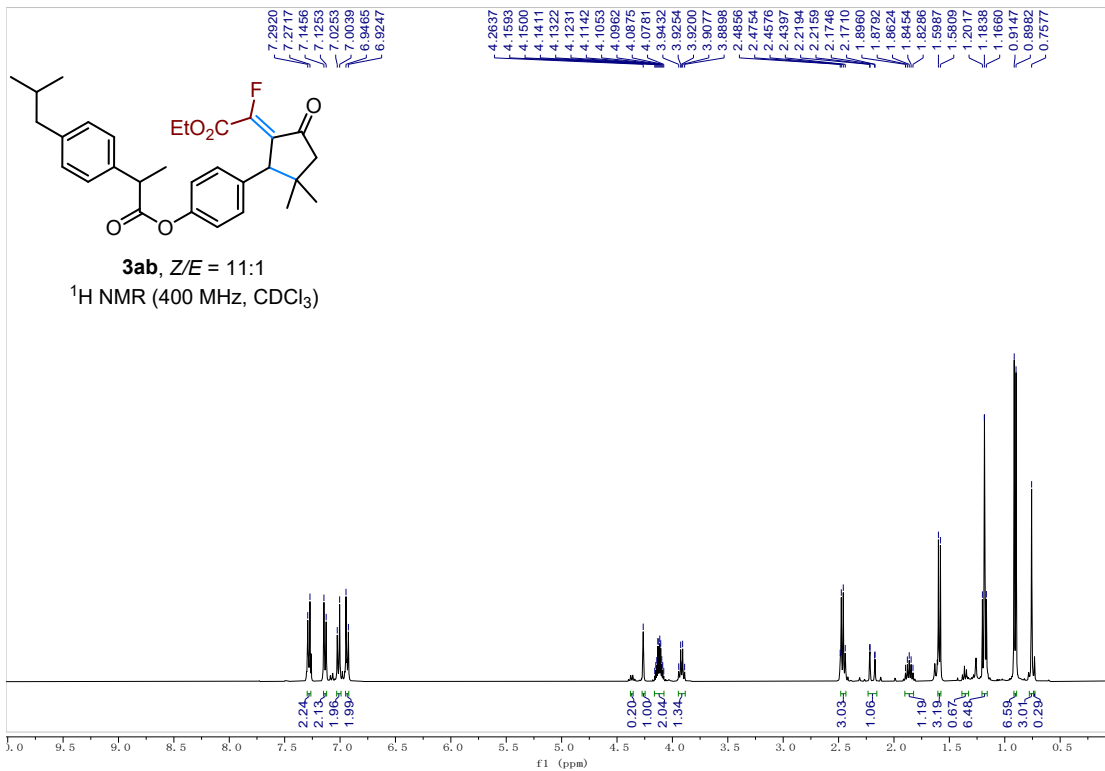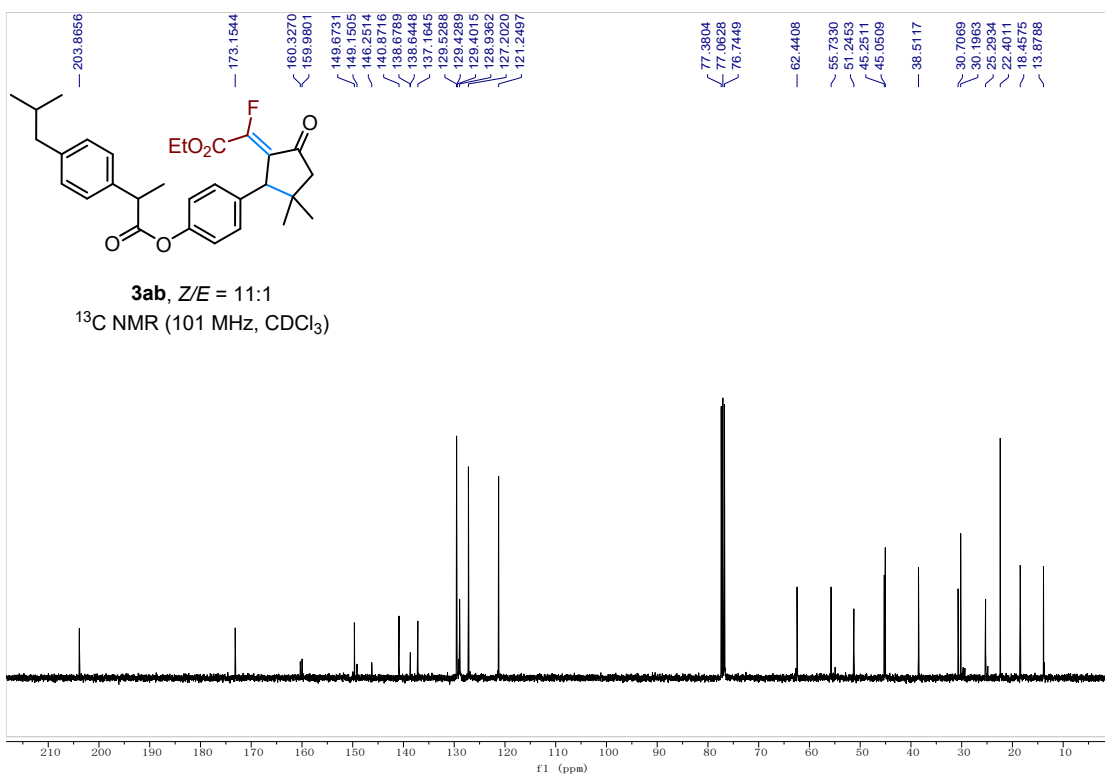

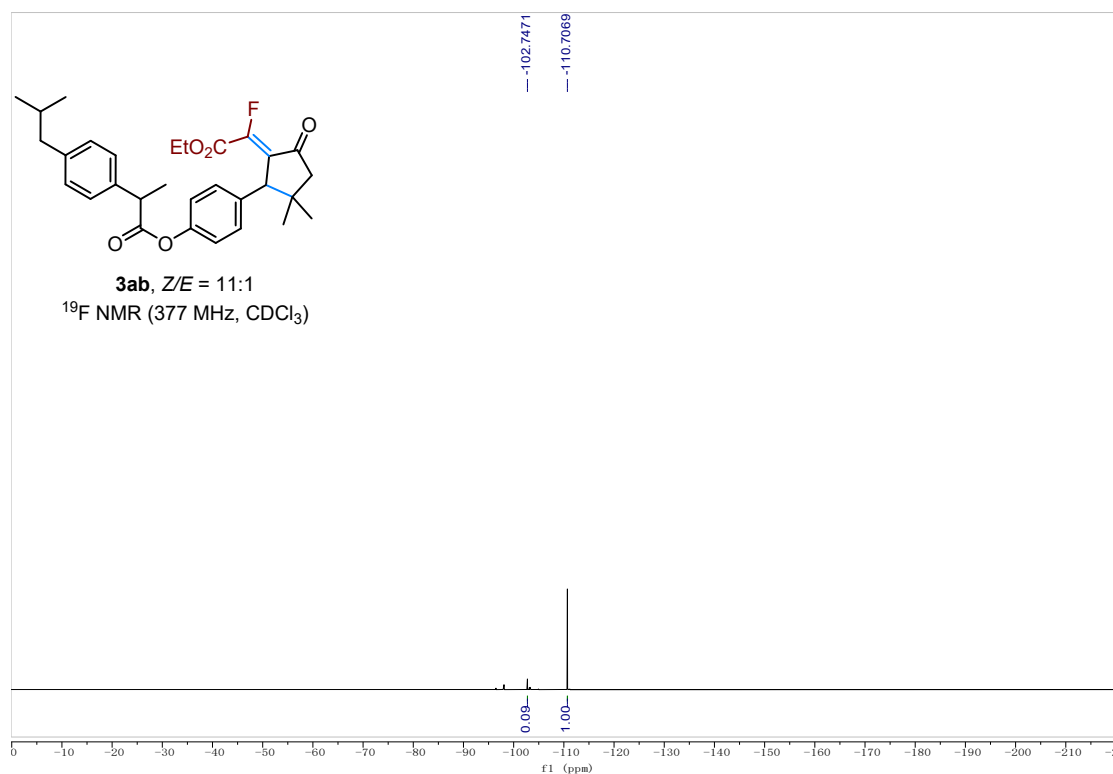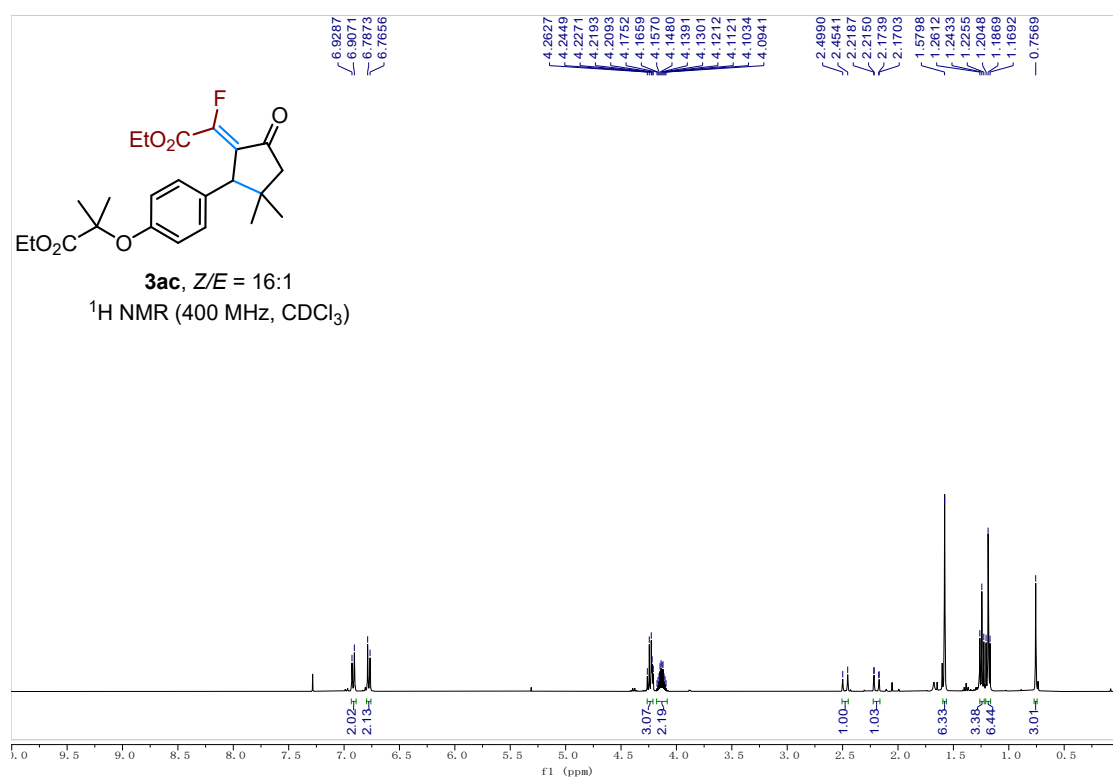

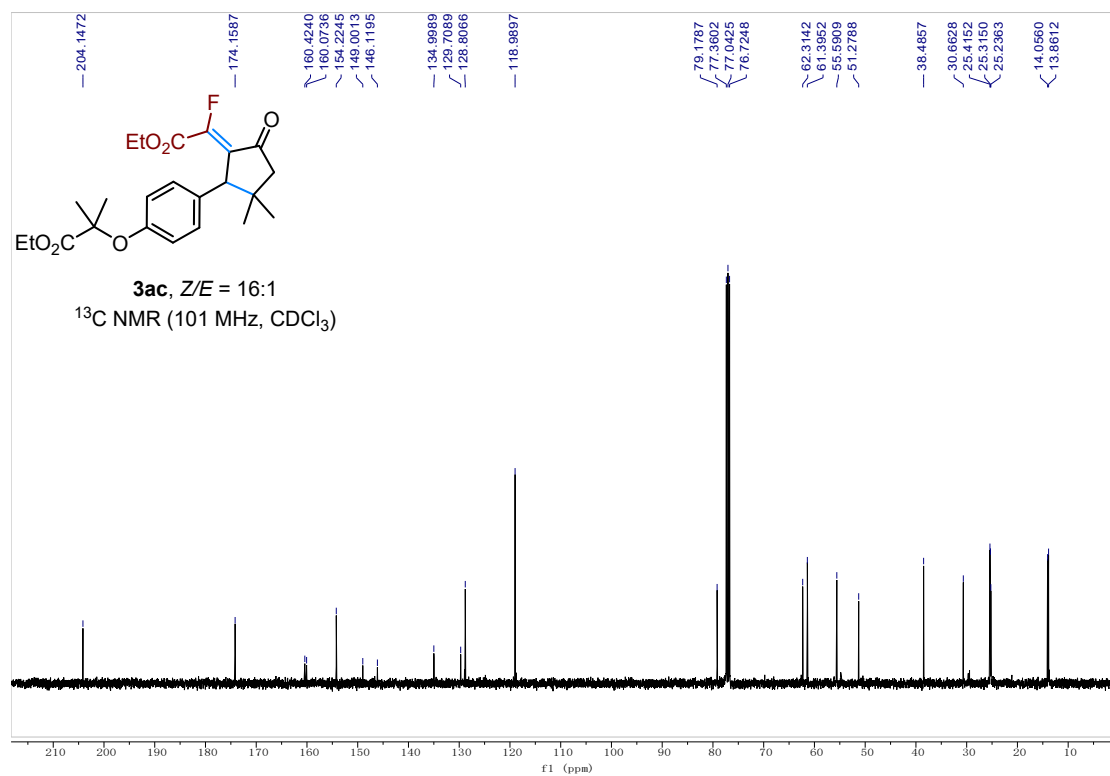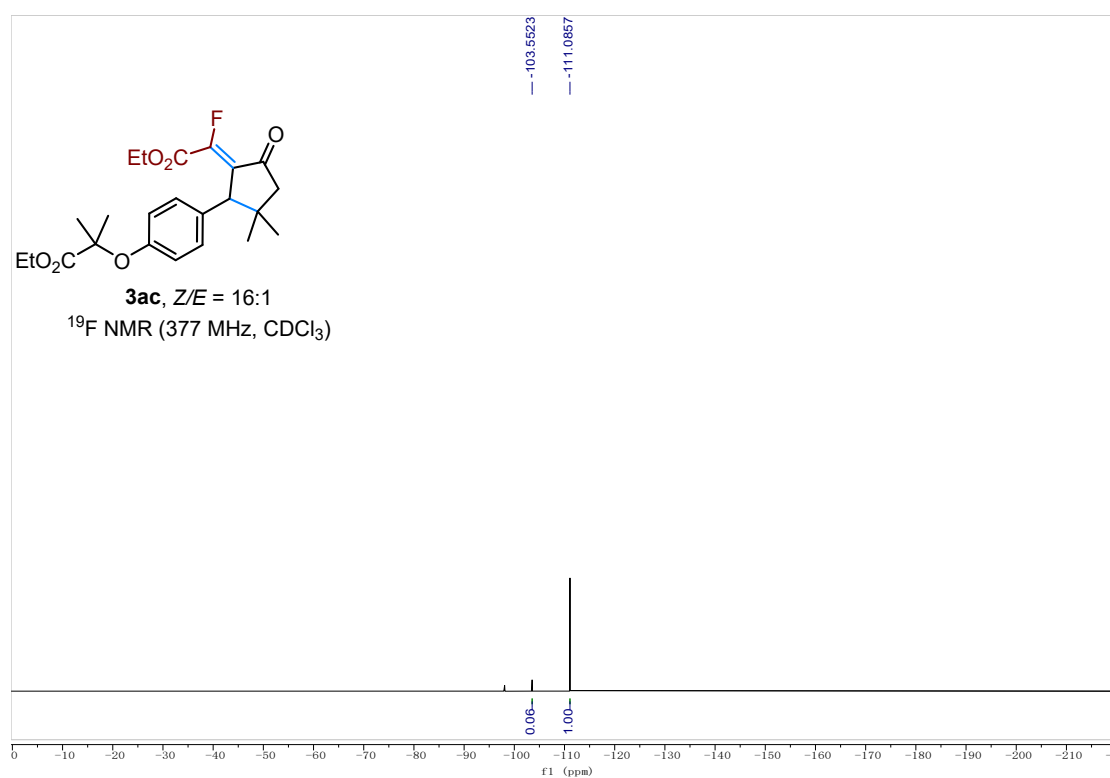

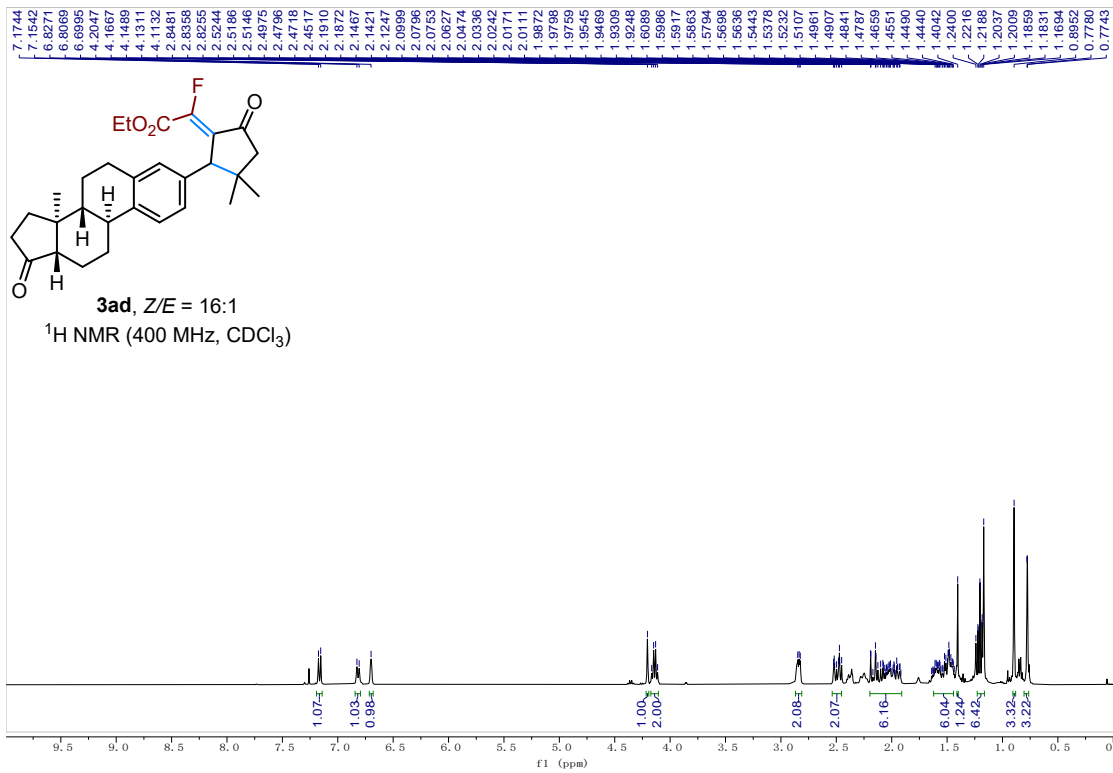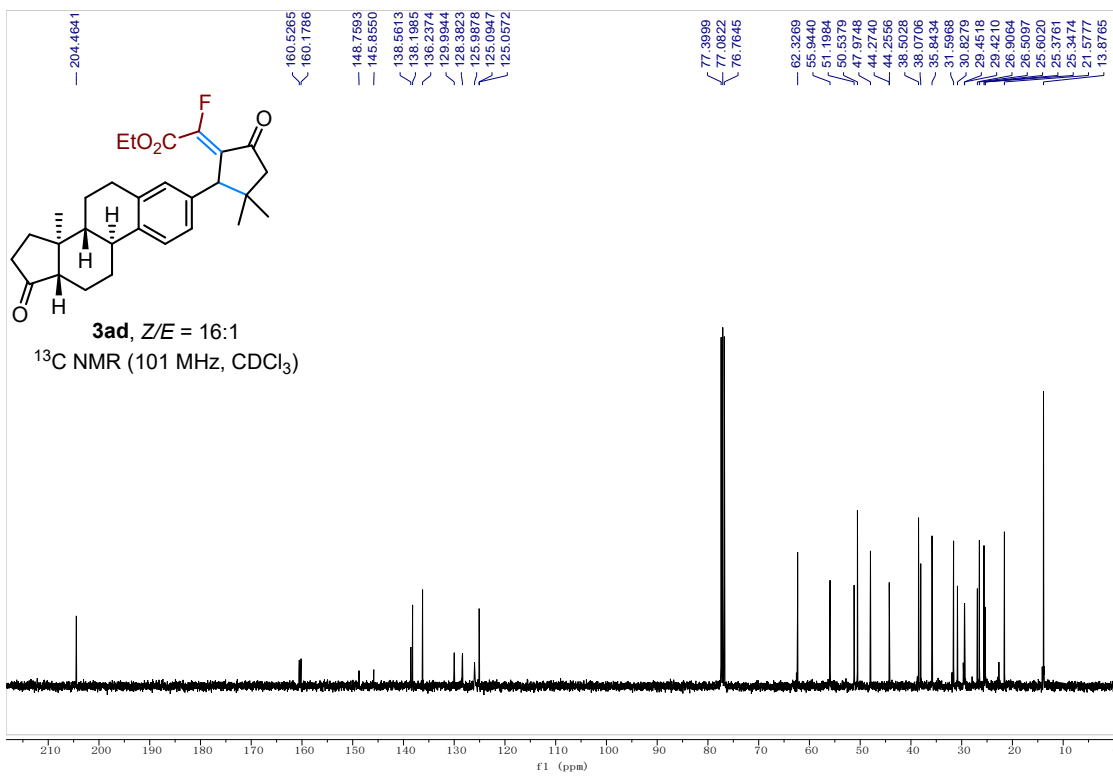

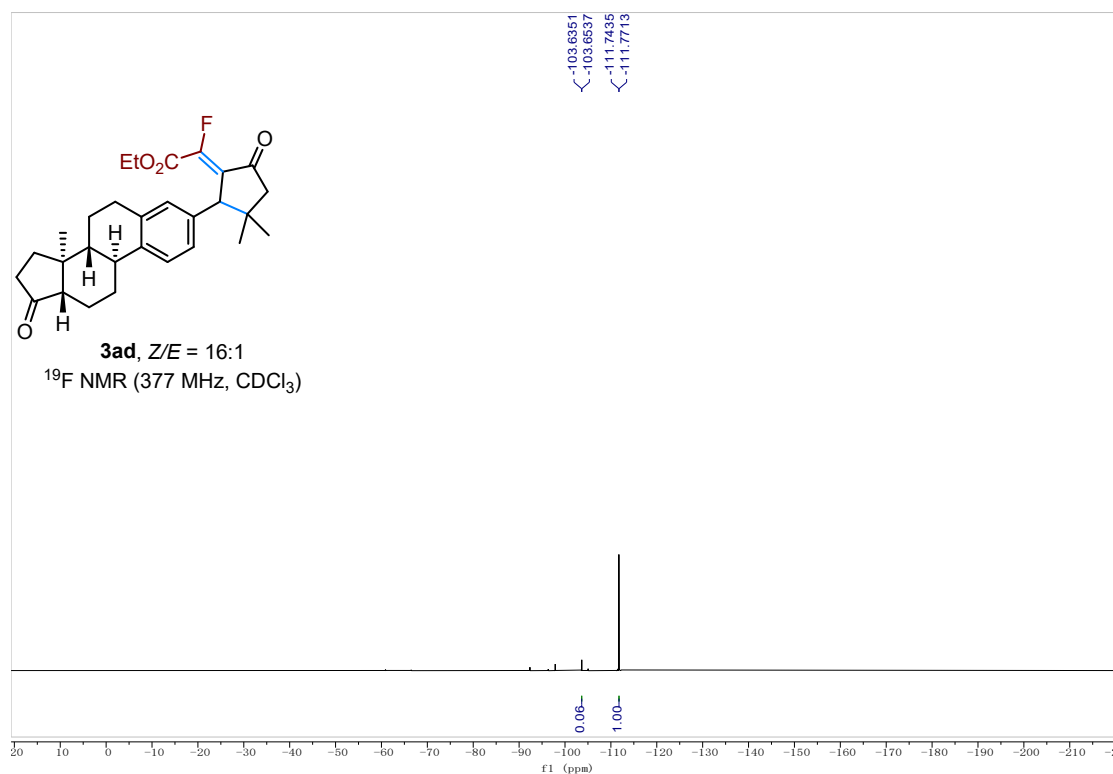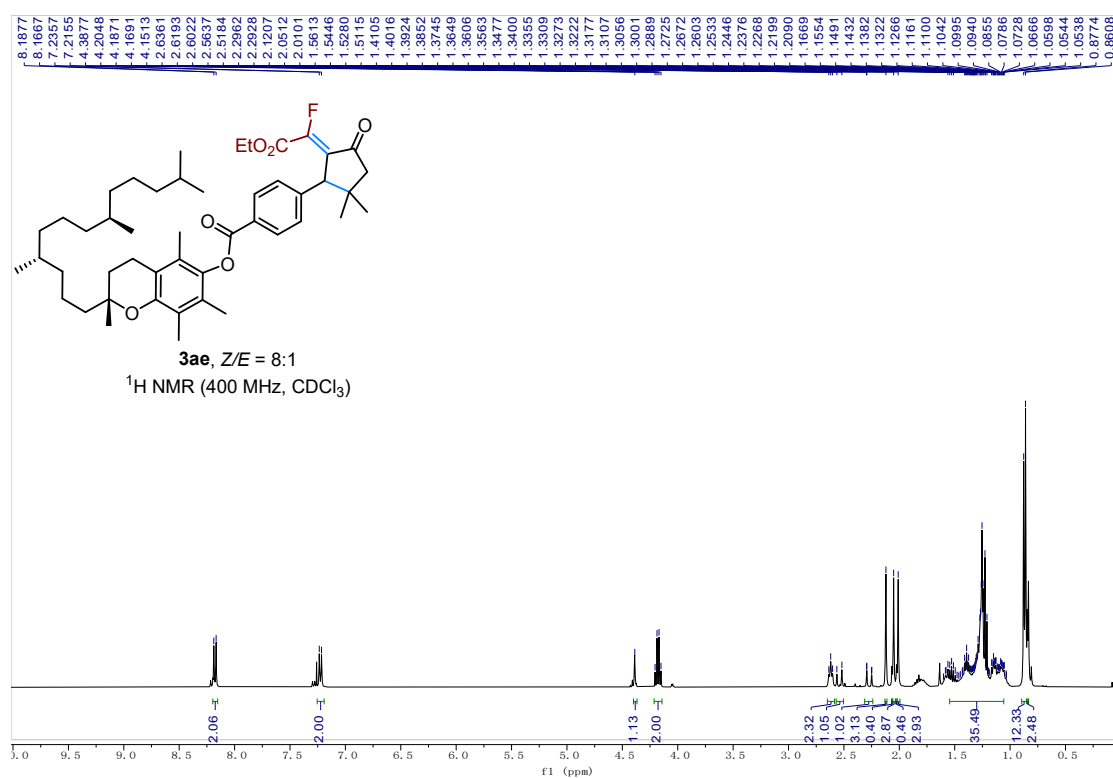

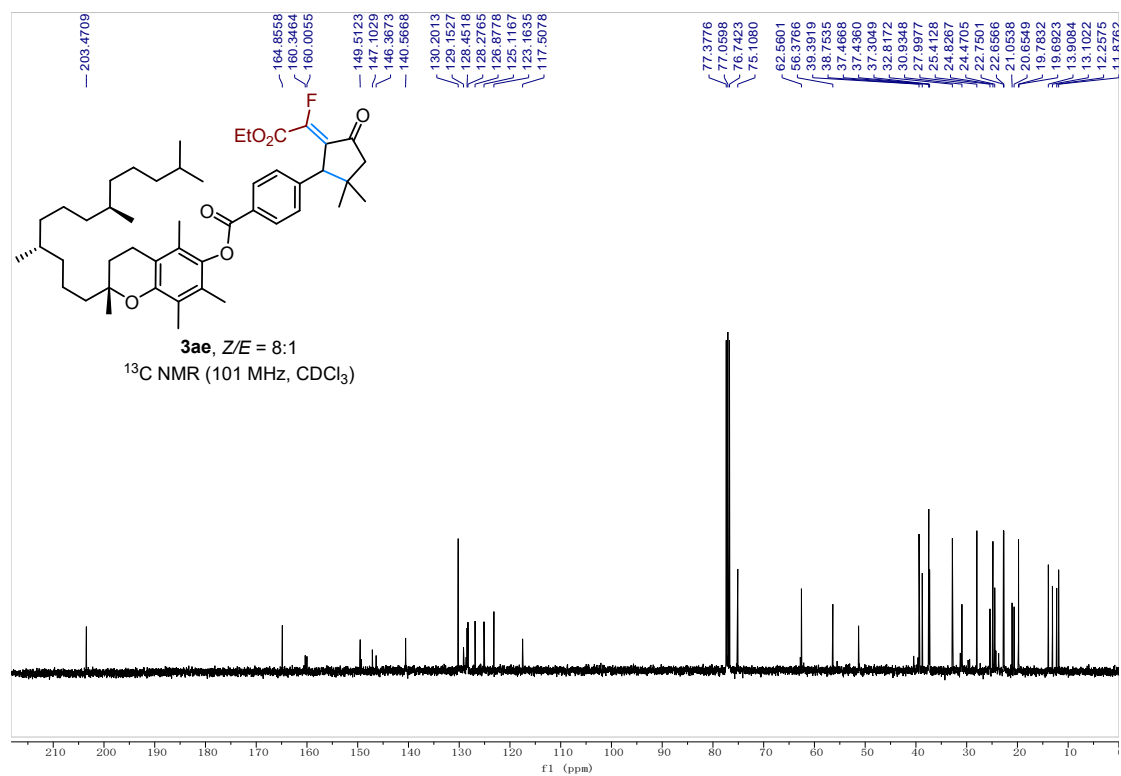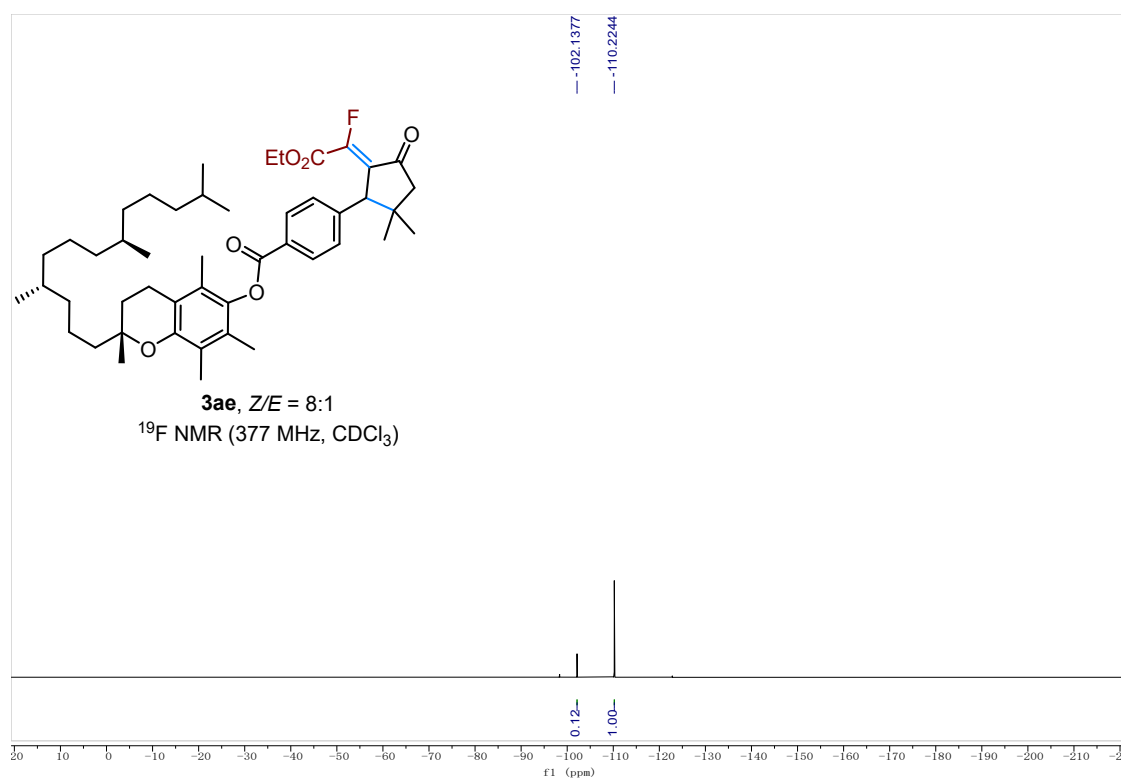

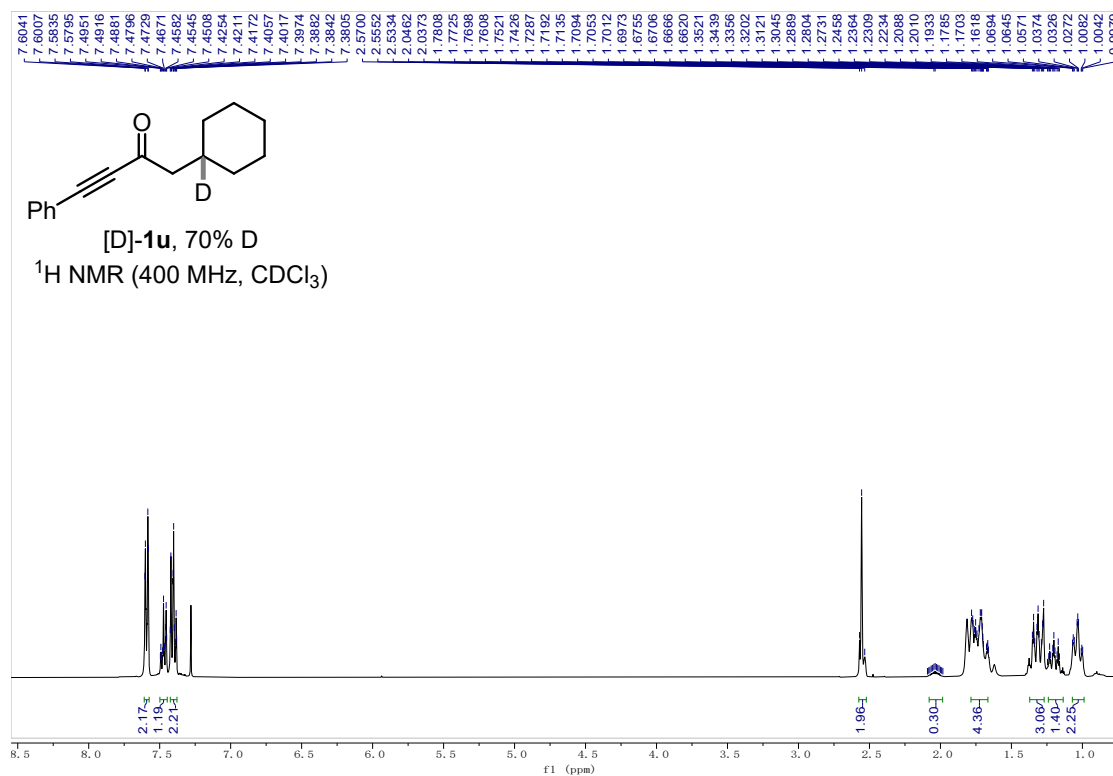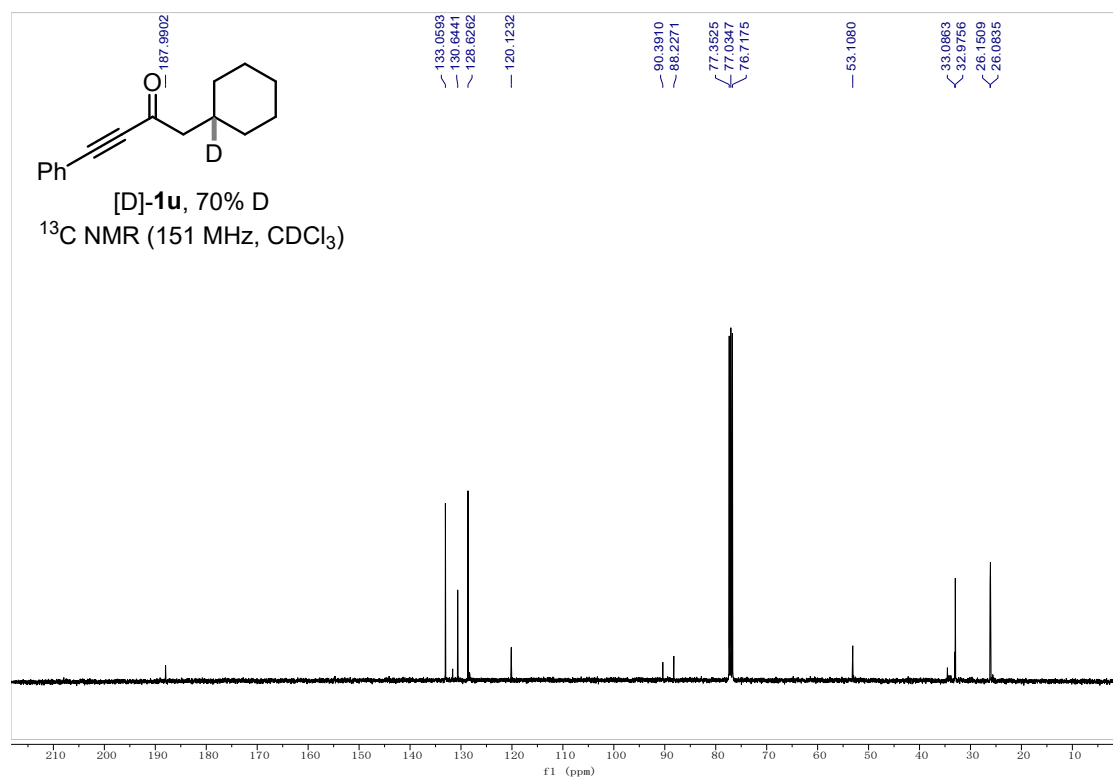

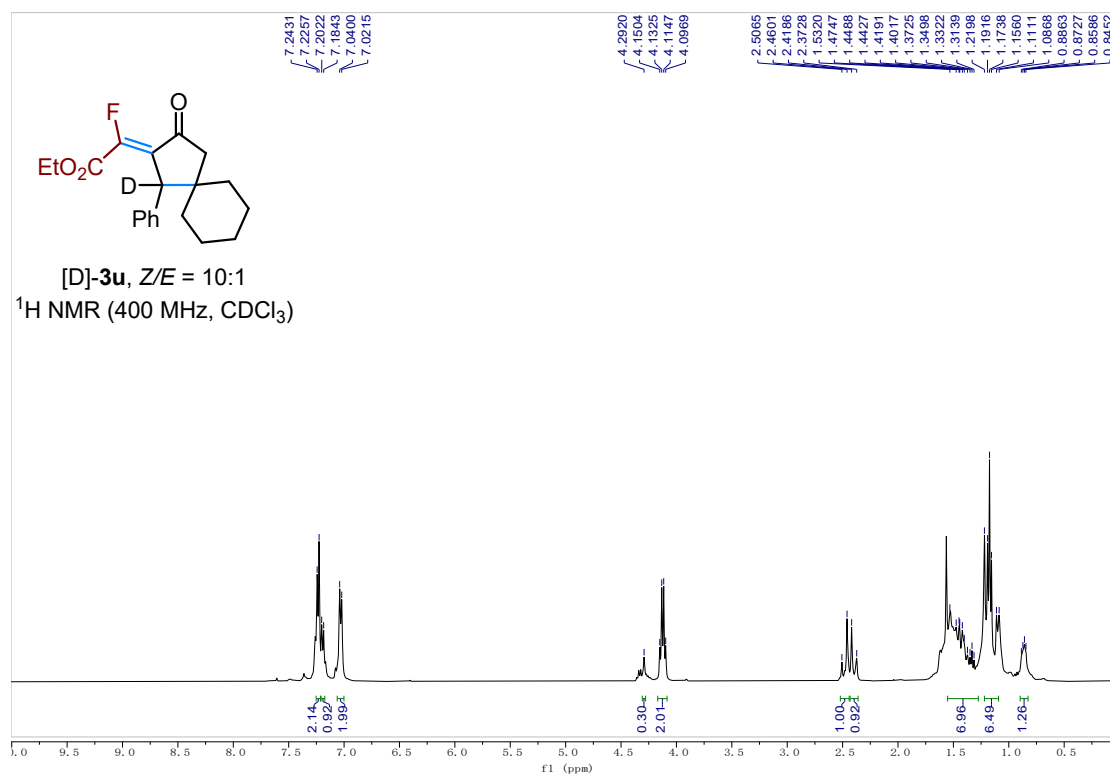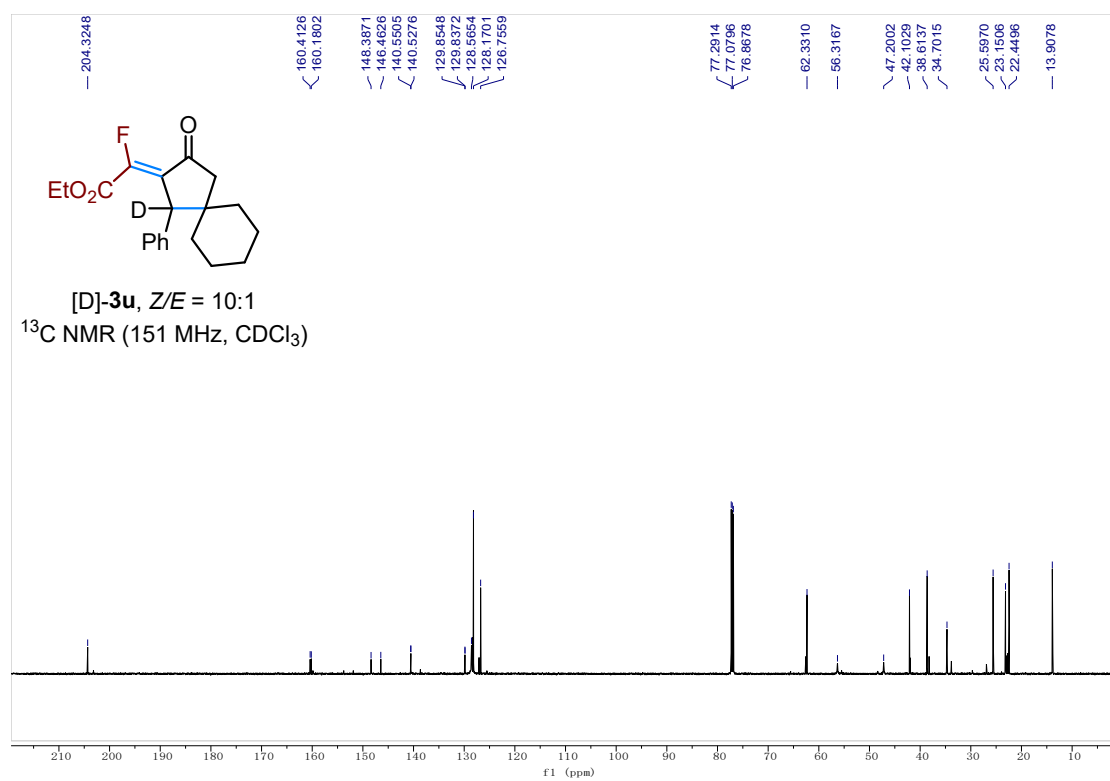



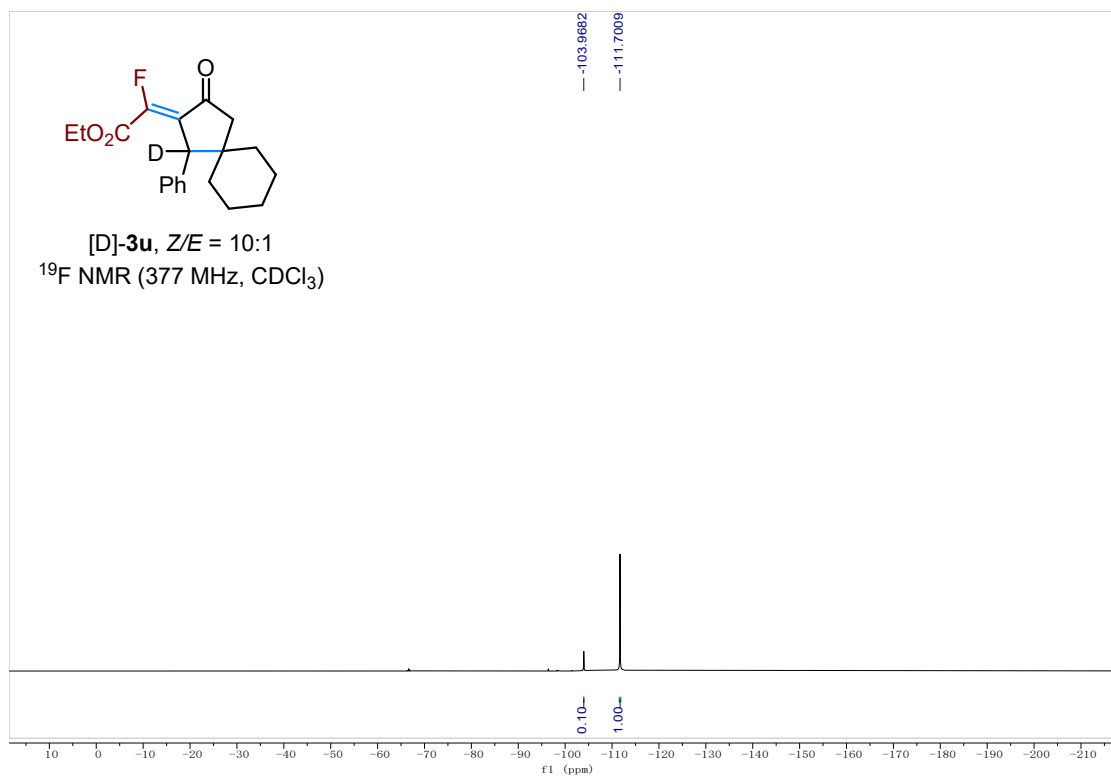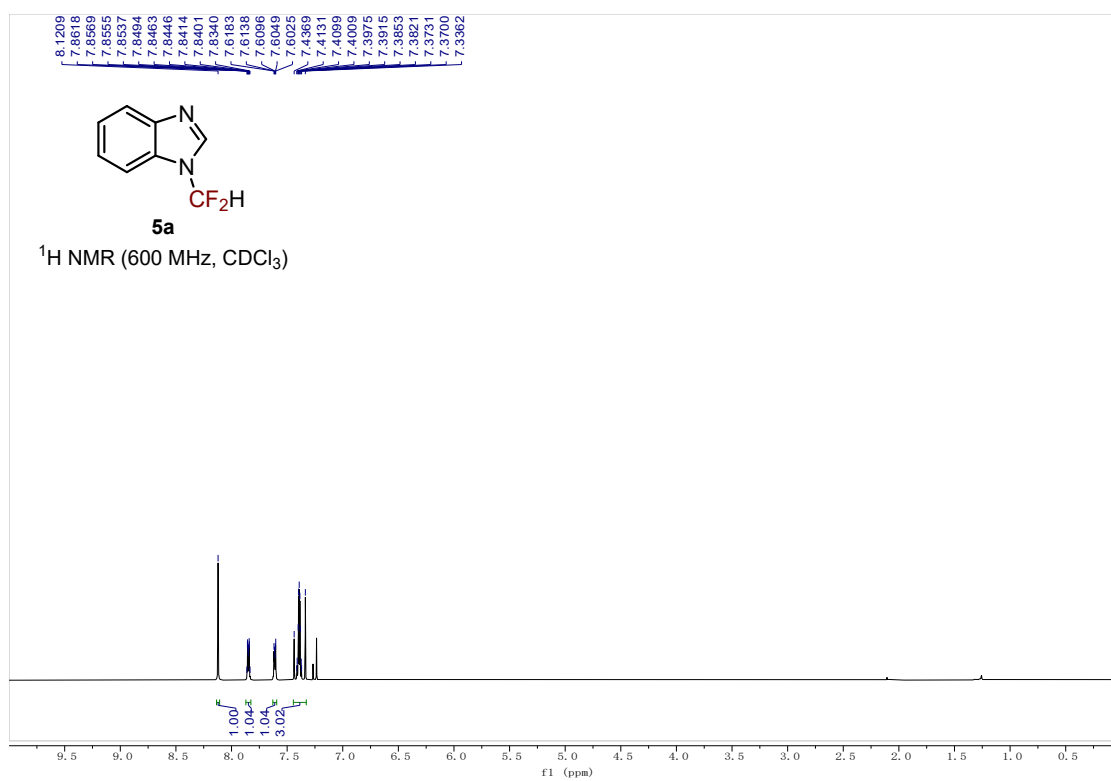

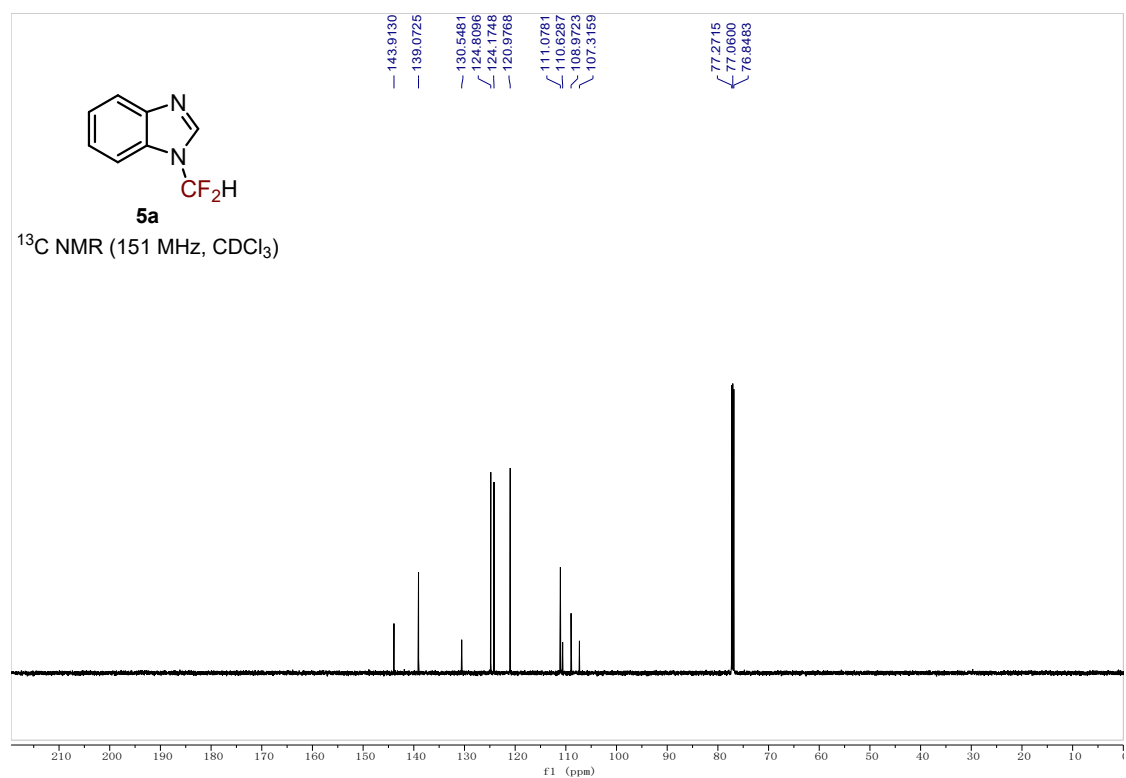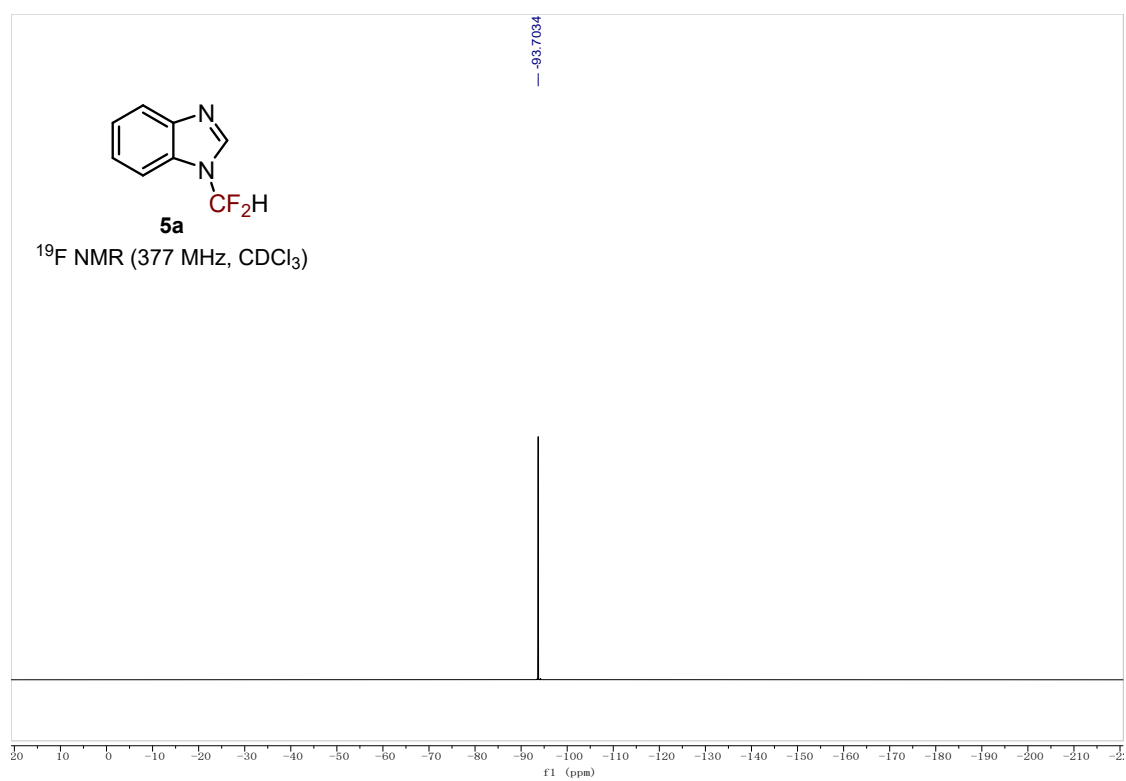

## 5. X-Ray Crystallographic Data

The crystal of (*Z*)-**3o** (major isomer) was recrystallized in ethyl acetate/petroleum ethers via slow evaporation at room temperature. Crystal data for (*Z*)-**3o** (C<sub>18</sub>H<sub>19</sub>FO<sub>5</sub>, 334.33): triclinic, space group P -1,  $a = 7.0823(8)$  Å,  $b = 8.7728(10)$  Å,  $c = 13.8942(15)$  Å,  $\alpha = 92.044(4)$ ,  $\beta = 102.990(4)$ ,  $\gamma = 94.510(4)$ ,  $U = 837.31(16)$  Å<sup>3</sup>,  $Z = 2$ ,  $T = 298(2)$  K, absorption coefficient 0.103 mm<sup>-1</sup>, reflections collected 3827, independent reflections 1889 [ $R(\text{int}) = 0.0760$ ], refinement by full-matrix least-squares on  $F^2$ , data/restraints/parameters 1889/1/228, goodness-of-fit on  $F^2 = 1.023$ , final  $R$  indices [ $I > 2\sigma(I)$ ]  $R_1 = 0.0758$ ,  $wR_2 = 0.2113$ , largest diff peak and hole 0.231 and -0.196 e.Å<sup>-3</sup>. Crystallographic data for the structure (*Z*)-**3o** have been deposited with the Cambridge Crystallographic Data Centre as supplementary publication no. CCDC 2215733.

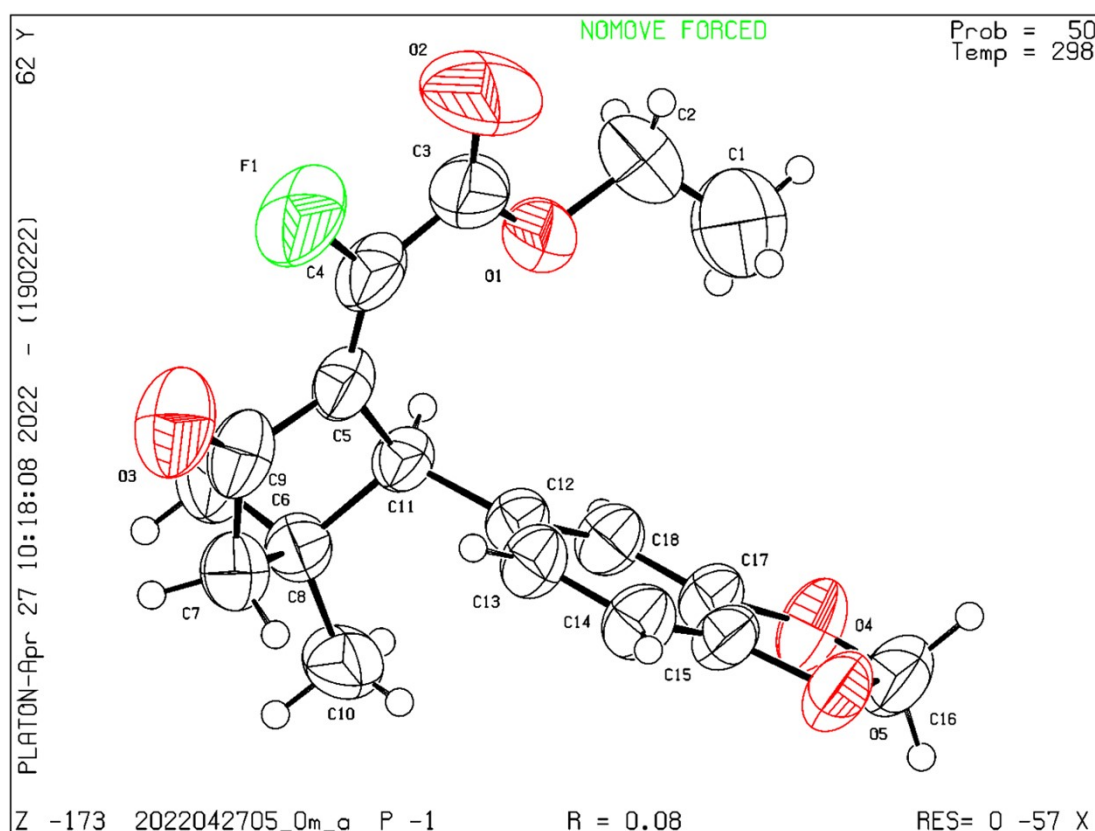

**Figure S1.** X-Ray crystal structure of (*Z*)-**3o** with the ellipsoid contour at 50% probability levels.

The crystal of (*Z*)-**3aa** (minor isomer) was recrystallized in ethyl acetate/petroleum ethers via slow evaporation at room temperature. Crystal data for (*Z*)-**3aa** (C<sub>19</sub>H<sub>24</sub>FNO<sub>2</sub>, 317.18): triclinic, space group P -1,  $a = 6.2396(2)$  Å,  $b = 9.9099(4)$  Å,  $c = 14.5635(6)$  Å,  $\alpha = 98.240(2)$ ,  $\beta = 98.468(2)$ ,  $\gamma = 91.823(2)$ ,  $U = 880.22(6)$  Å<sup>3</sup>,  $Z = 2$ ,  $T = 298$  K, absorption coefficient 0.682 mm<sup>-1</sup>, reflections

collected 3199, independent reflections 2453 [ $R(\text{int}) = 0.1314$ ], refinement by full-matrix least-squares on  $F^2$ , data/restraints/parameters 2453/0/213, goodness-of-fit on  $F^2 = 1.048$ , final  $R$  indices [ $I > 2s(I)$ ]  $R_1 = 0.0682$ ,  $wR_2 = 0.2032$ , largest diff peak and hole 0.391 and  $-0.244 \text{ e.}\text{\AA}^{-3}$ . Crystallographic data for the structure (*Z*)-**3aa** have been deposited with the Cambridge Crystallographic Data Centre as supplementary publication no. CCDC 2215372.

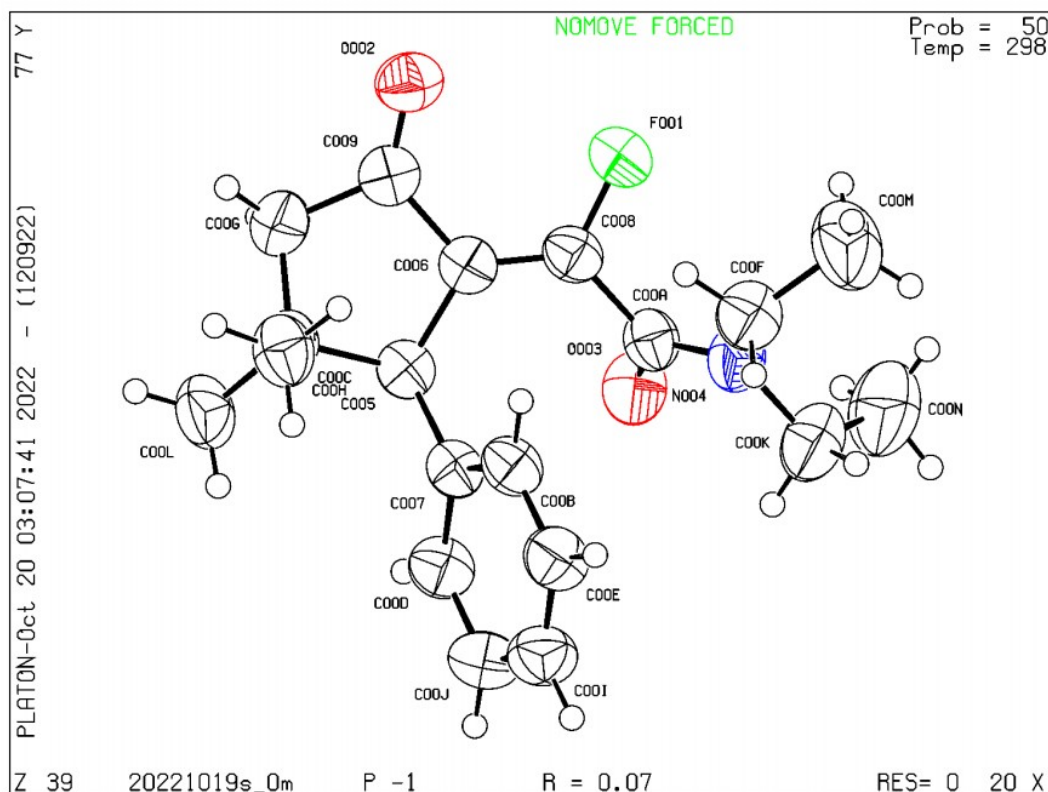

**Figure S2.** X-Ray crystal structure of (*Z*)-**3aa** with the ellipsoid contour at 50% probability levels.

## 6. Computational Data

**Computational details:** All density functional theory (DFT) calculations were performed using Gaussian 16.<sup>2</sup> Geometry optimizations and frequencies were calculated at the B3LYP-D3(BJ)/6-31g(d,p)-SMD(dichloromethane) level of theory.<sup>3,4</sup> Frequency calculations confirmed that optimized structures are minima (no imaginary frequency) or transition structures (one imaginary frequency). To obtain more accurate electronic energies, single-point energy calculations were performed at the  $\omega$ B97XD/def2-TZVP-SMD(dichloromethane) level of theory with the optimized structures. Grimme's quasi-RRHO correction<sup>5</sup> for the frequencies that are below 100 cm<sup>-1</sup> and concentration correction for all species (from 1 atm to 1 mol/L) are implemented by the GoodVibes program.<sup>6</sup>

---

<sup>3</sup> (a) Lee, C.; Yang, W.; Parr, R. G. Development of the Colle-Salvetti Correlation-Energy Formula into a Functional of the Electron Density. *Phys. Rev. B: Condens. Matter Mater. Phys.* 1988, **37**, 785. (b) Becke, A. D. Density-functional thermochemistry. III. The Role of Exact Exchange. *J. Chem. Phys.* 1993, **98**, 5648; (c) Grimme, S.; Antony, J.; Ehrlich, S.; Krieg, H. *J. Chem. Phys.* 2010, **132**, 154104.

<sup>4</sup> Marenich, A. V.; Cramer, C. J.; Truhlar, D. G. Universal Solvation Model Based on Solute Electron Density and on a Continuum Model of the Solvent Defined by the Bulk Dielectric Constant and Atomic Surface Tensions. *J. Phys. Chem. B* 2009, **113**, 6378.

<sup>5</sup> Grimme, S. Supramolecular Binding Thermodynamics by Dispersion-Corrected Density Functional Theory. *Chem. Eur. J.* 2012, **18**, 9955.

<sup>6</sup> Luchini, G.; Alegre-Requena J. V.; Guan, Y.; Funes-Ardoiz, I.; Paton, R. S. 2019, GoodVibes: GoodVibes 3.0.1 <http://doi.org/10.5281/zenodo.595246>

**Table S1.** The Gibbs free energies of (Z)-3a, (E)-3a, (Z)-3aa and (E)-3aa.

| Entry | structure | Calcd. G (hartree) | Calcd. ΔG (kcal/mol) |
|-------|-----------|--------------------|----------------------|
| 1     | (Z)-3a    | -984.58201         |                      |
| 2     | (E)-3a    | -984.58033         | -1.1                 |
| 3     | (Z)-3aa   | -1043.282793       |                      |
| 4     | (E)-3aa   | -1043.284176       | +0.9                 |

| The    | calculated | Cartesian | coordinates | of     | optimized | structures        |
|--------|------------|-----------|-------------|--------|-----------|-------------------|
| (Z)-3a |            |           |             | H      | -0.36199  | 0.68927 2.09937   |
| C      | -0.79992   | 0.29611   | -0.62188    | C      | 1.7829    | 3.0498 -0.09579   |
| C      | -2.27721   | 0.83163   | -0.8154     | H      | 0.88094   | 2.0548 -1.77759   |
| C      | -3.00389   | 0.33484   | 0.44731     | C      | 1.86111   | 3.1313 1.29664    |
| C      | -2.36284   | -1.00117  | 0.77325     | H      | 1.13637   | 2.32912 3.1617    |
| C      | -1.00051   | -1.00283  | 0.13713     | H      | 2.39174   | 3.70162 -0.71558  |
| H      | -2.80992   | 1.00649   | 1.29495     | H      | 2.5279    | 3.84784 1.76665   |
| H      | -4.08699   | 0.24127   | 0.33654     | H      | -0.37468  | 0.09835 -1.60683  |
| O      | -2.85799   | -1.89403  | 1.43751     |        |           |                   |
| C      | -0.12642   | -2.01176  | 0.287       | (E)-3a |           |                   |
| F      | -0.45921   | -3.10008  | 0.99742     | C      | 1.25966   | -0.62981 0.62967  |
| C      | -2.36784   | 2.34775   | -0.97937    | C      | 1.80378   | -1.92349 -0.10692 |
| H      | -3.41228   | 2.64447   | -1.12389    | C      | 0.83903   | -2.09088 -1.30181 |
| H      | -1.98381   | 2.87421   | -0.10195    | C      | -0.50575  | -1.61292 -0.78807 |
| H      | -1.80078   | 2.68681   | -1.85264    | C      | -0.2217   | -0.65922 0.32346  |
| C      | -2.87276   | 0.14113   | -2.05369    | H      | 1.13074   | -1.42665 -2.12714 |
| H      | -2.33865   | 0.44505   | -2.96013    | H      | 0.78339   | -3.10952 -1.69272 |
| H      | -2.81108   | -0.95067  | -1.98019    | O      | -1.60663  | -1.9705 -1.17415  |
| H      | -3.92802   | 0.40767   | -2.17373    | C      | -1.15988  | 0.04601 0.95723   |
| C      | 1.28472    | -2.1207   | -0.19551    | F      | -0.83365  | 0.8227 2.00866    |
| O      | 2.01128    | -3.03511  | 0.13961     | C      | 3.2613    | -1.81335 -0.55051 |
| O      | 1.62243    | -1.11164  | -1.00121    | H      | 3.57517   | -2.74342 -1.03649 |
| C      | 3.01633    | -1.03661  | -1.41677    | H      | 3.40845   | -0.99395 -1.25877 |
| H      | 2.98802    | -0.41532  | -2.31284    | H      | 3.92289   | -1.64328 0.30543  |
| H      | 3.35522    | -2.04025  | -1.68139    | C      | 1.64095   | -3.11712 0.84815  |
| C      | 3.87179    | -0.41669  | -0.32898    | H      | 2.28662   | -3.00109 1.72494  |
| H      | 4.89939    | -0.31615  | -0.69334    | H      | 0.60894   | -3.21599 1.20355  |
| H      | 3.49983    | 0.57541   | -0.06047    | H      | 1.91159   | -4.05209 0.34648  |
| H      | 3.88563    | -1.04554  | 0.56478     | C      | -2.63866  | 0.05967 0.69326   |
| C      | 0.1372     | 1.26619   | 0.07992     | O      | -3.4457   | -0.28102 1.53376  |
| C      | 0.22607    | 1.35393   | 1.47452     | O      | -2.90943  | 0.52324 -0.5232   |
| C      | 0.92977    | 2.12345   | -0.69455    | C      | -4.30676  | 0.49645 -0.93917  |
| C      | 1.07988    | 2.27903   | 2.07825     | H      | -4.76588  | -0.41399 -0.54896 |

|                |          |          |          |                |          |          |          |
|----------------|----------|----------|----------|----------------|----------|----------|----------|
| H              | -4.25519 | 0.43707  | -2.02739 | C              | 2.14056  | 3.1298   | 0.446    |
| C              | -5.03484 | 1.74225  | -0.47493 | H              | 1.02291  | 1.93175  | 1.84242  |
| H              | -6.05821 | 1.72976  | -0.86382 | C              | 2.75882  | 3.17472  | -0.80448 |
| H              | -5.08165 | 1.78489  | 0.61615  | H              | 3.20106  | 2.07314  | -2.60454 |
| H              | -4.53745 | 2.64399  | -0.84429 | H              | 2.1472   | 4.00415  | 1.09035  |
| C              | 1.92077  | 0.67179  | 0.20615  | H              | 3.25086  | 4.08277  | -1.13975 |
| C              | 1.5508   | 1.35358  | -0.96131 | H              | 0.09952  | -0.12426 | 1.35194  |
| C              | 2.9611   | 1.19484  | 0.98405  | N              | -2.517   | 0.63911  | 0.20778  |
| C              | 2.2125   | 2.52062  | -1.34448 | C              | -3.15836 | 1.94356  | 0.41609  |
| H              | 0.73471  | 0.98049  | -1.57193 | H              | -3.36748 | 2.37606  | -0.56393 |
| C              | 3.62366  | 2.36269  | 0.60485  | H              | -4.11229 | 1.76579  | 0.91942  |
| H              | 3.25021  | 0.68082  | 1.89657  | C              | -2.85787 | -0.45118 | 1.13067  |
| C              | 3.25276  | 3.02917  | -0.56412 | H              | -2.00409 | -1.12404 | 1.22084  |
| H              | 1.91127  | 3.03537  | -2.25221 | H              | -3.01638 | -0.00191 | 2.11459  |
| H              | 4.42505  | 2.75345  | 1.22511  | C              | -4.09296 | -1.22499 | 0.67591  |
| H              | 3.76471  | 3.93957  | -0.86101 | H              | -4.34017 | -2.00582 | 1.40235  |
| H              | 1.42926  | -0.7451  | 1.70443  | H              | -4.95947 | -0.5639  | 0.57497  |
| <b>(Z)-3aa</b> |          |          |          | H              | -3.90768 | -1.69962 | -0.2928  |
| C              | 0.80078  | -0.43728 | 0.57298  | C              | -2.27515 | 2.88119  | 1.23565  |
| C              | 1.77851  | -1.51136 | 1.20435  | H              | -2.78493 | 3.83671  | 1.39697  |
| C              | 2.117    | -2.43243 | 0.0151   | H              | -2.0435  | 2.4491   | 2.21484  |
| C              | 0.86185  | -2.4559  | -0.84411 | H              | -1.33487 | 3.07532  | 0.7125   |
| C              | 0.08748  | -1.22936 | -0.50911 | <b>(E)-3aa</b> |          |          |          |
| H              | 2.92318  | -2.00068 | -0.59348 | C              | 1.51258  | -0.81396 | 0.61303  |
| H              | 2.4228   | -3.44104 | 0.30488  | C              | 2.01287  | -2.07326 | -0.20717 |
| O              | 0.56023  | -3.31508 | -1.65658 | C              | 1.01826  | -2.15996 | -1.38582 |
| C              | -1.06156 | -0.85698 | -1.08236 | C              | -0.29764 | -1.62284 | -0.84819 |
| F              | -1.64844 | -1.59946 | -2.0405  | C              | 0.02206  | -0.8191  | 0.35668  |
| C              | 3.02408  | -0.90442 | 1.84703  | H              | 1.32706  | -1.49959 | -2.20769 |
| H              | 3.64822  | -1.69615 | 2.27536  | H              | 0.90267  | -3.16585 | -1.79781 |
| H              | 3.62637  | -0.35376 | 1.11988  | O              | -1.40702 | -1.79517 | -1.33337 |
| H              | 2.75689  | -0.21526 | 2.65531  | C              | -0.89583 | -0.1665  | 1.0723   |
| C              | 0.98807  | -2.30958 | 2.25429  | F              | -0.50347 | 0.55777  | 2.1458   |
| H              | 0.68352  | -1.66424 | 3.08508  | C              | 3.46239  | -1.96237 | -0.67658 |
| H              | 0.08352  | -2.75684 | 1.82623  | H              | 3.75128  | -2.86836 | -1.22026 |
| H              | 1.59875  | -3.12265 | 2.66068  | H              | 3.60809  | -1.10707 | -1.34166 |
| C              | -1.75743 | 0.47035  | -0.8959  | H              | 4.14484  | -1.85    | 0.17268  |
| O              | -1.5785  | 1.32766  | -1.76518 | C              | 1.84869  | -3.31353 | 0.6862   |
| C              | 1.47534  | 0.82152  | 0.05622  | H              | 2.51161  | -3.25565 | 1.55593  |
| C              | 2.09167  | 0.88122  | -1.20057 | H              | 0.82119  | -3.41338 | 1.05366  |
| C              | 1.50598  | 1.9614   | 0.86974  | H              | 2.09465  | -4.22432 | 0.13011  |
| C              | 2.731    | 2.04578  | -1.62585 | C              | -2.40143 | -0.18809 | 0.95478  |
| H              | 2.0605   | 0.01973  | -1.85989 |                |          |          |          |

|   |          |          |          |
|---|----------|----------|----------|
| O | -3.01893 | -0.92205 | 1.7316   |
| C | 2.16192  | 0.50593  | 0.22982  |
| C | 1.76252  | 1.23359  | -0.90036 |
| C | 3.20784  | 1.01148  | 1.0113   |
| C | 2.39567  | 2.42914  | -1.24098 |
| H | 0.94701  | 0.87149  | -1.51773 |
| C | 3.84327  | 2.20751  | 0.67469  |
| H | 3.52088  | 0.46316  | 1.89555  |
| C | 3.4397   | 2.92107  | -0.45487 |
| H | 2.06988  | 2.97813  | -2.11973 |
| H | 4.64899  | 2.58366  | 1.29838  |
| H | 3.92966  | 3.8539   | -0.7172  |
| H | 1.72157  | -0.98331 | 1.67325  |
| N | -2.97128 | 0.65872  | 0.07403  |
| C | -4.43488 | 0.69184  | -0.01286 |
| H | -4.83075 | 0.46385  | 0.97821  |
| H | -4.72464 | 1.71527  | -0.26768 |
| C | -2.2004  | 1.49245  | -0.85886 |
| H | -1.36174 | 0.91554  | -1.24807 |
| H | -2.85558 | 1.70154  | -1.70769 |
| C | -1.71581 | 2.79368  | -0.22478 |
| H | -1.17231 | 3.39316  | -0.96215 |
| H | -2.55878 | 3.38565  | 0.14592  |
| H | -1.04309 | 2.59554  | 0.61428  |
| C | -4.97222 | -0.2998  | -1.04248 |
| H | -6.06373 | -0.23243 | -1.09797 |
| H | -4.56648 | -0.09554 | -2.0385  |
| H | -4.70186 | -1.32224 | -0.76501 |
